# Supplementary material
Source: PubMed Central journal article supplement (PMC5543920)
Supplement: jciinsight-2-93230-s001.pdf [file jciinsight-2-93230-s001.pdf]

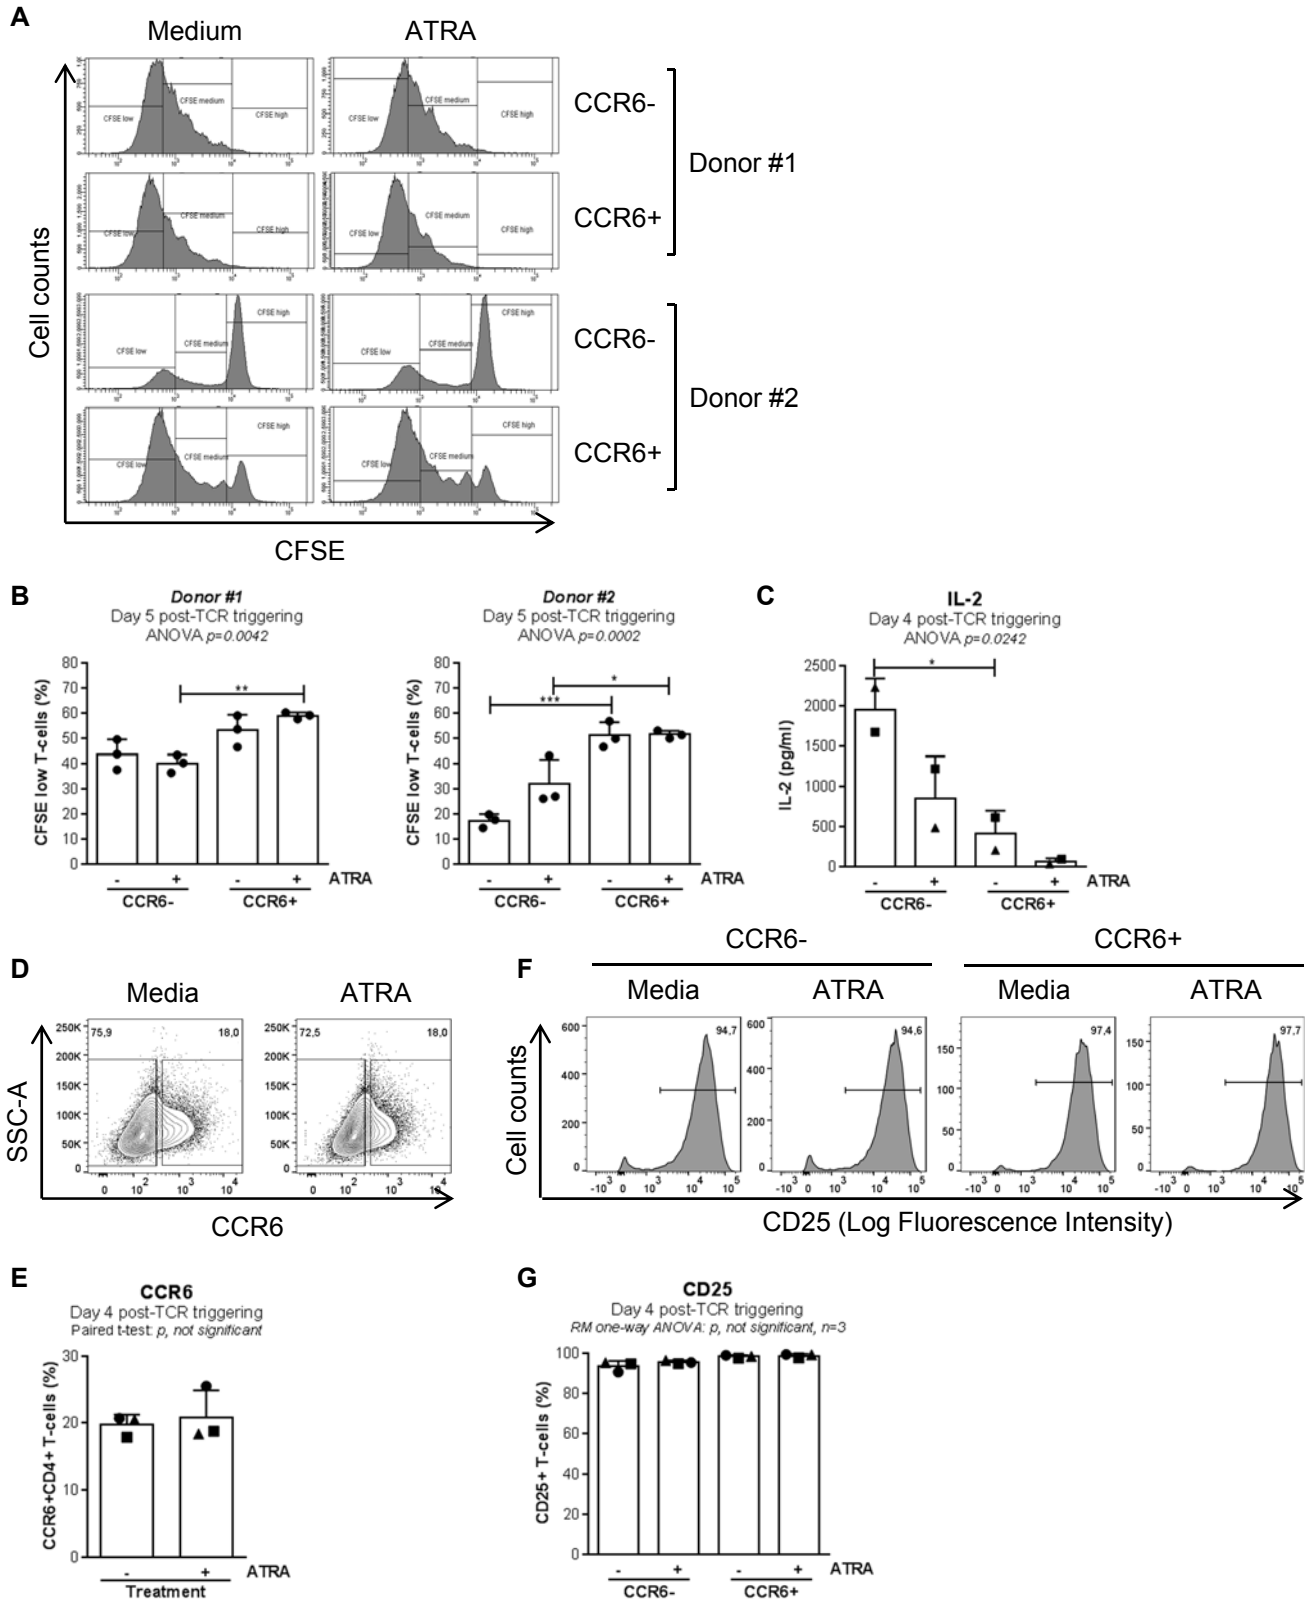

**Suppl. Figure 1: Proliferation and IL-2 production of CCR6<sup>+</sup> versus CCR6<sup>-</sup> T-cells upon exposure to ATRA.** (A-B) FACS-sorted memory CCR6<sup>+</sup> and CCR6<sup>-</sup> T-cells were loaded with CFSE (0.5  $\mu$ M) and stimulated *via* CD3/CD28 for five days in the presence/absence of ATRA (10 nM). Shown are (A) flow cytometry histograms and (B) bar graph representation of CFSE dilution (CFSE<sup>low</sup>) in n=2 independent donors; each point represent one experimental triplicate (mean $\pm$ SD of triplicate wells). (C) Levels of IL-2 were quantified by ELISA in cell culture supernatants of FACS-sorted memory CCR6<sup>+</sup> and CCR6<sup>-</sup> T-cells at day 4 post-TCR triggering in presence or absence of ATRA. Shown are results from n=2 different donors (mean $\pm$ SD). (D-G) Total memory CD4<sup>+</sup> T-cells were stimulated *via* the TCR in the presence or absence of ATRA (10 nM) for 4 days. The expression of CCR6 and CD25 was analyzed by flow cytometry. Shown are histograms from one representative donor for CCR6 expression on total memory T-cells (D) and CD25 expression on CCR6<sup>+</sup>/CCR6<sup>-</sup> T-cells (F), as well as statistical analysis on n=3 different HIV-uninfected individuals (mean $\pm$ SEM; each symbol represents one different donor) (E, G). RM one-way ANOVA p-values (G) or ordinary one-way ANOVA (B, C, D), with the significance of the Tukey's multiple comparisons test, or Paired t-Test p-values (F) are indicated on the figures. Each symbol represents one triplicate value (B) or one different donor (C, E, G).

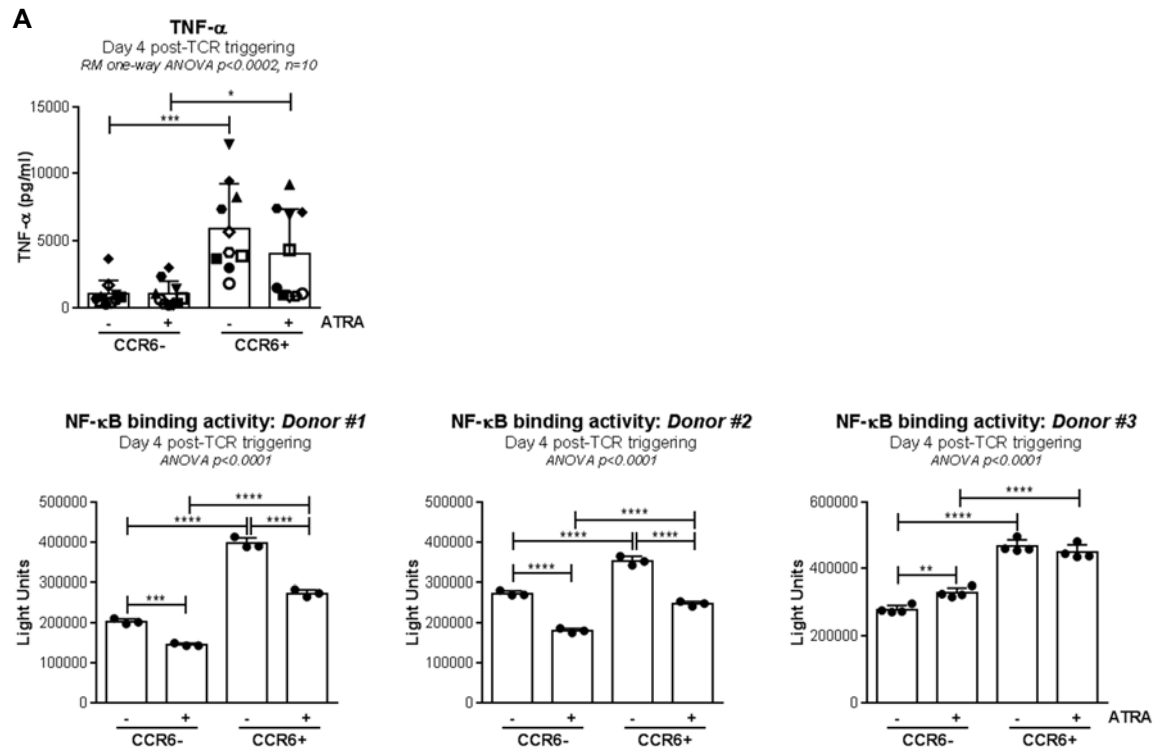

**Suppl. Figure 2: TNF- $\alpha$  production and NF- $\kappa$ B DNA-binding activity in CCR6<sup>+</sup> versus CCR6<sup>-</sup> T-cells in the presence or absence of ATRA.** Memory CCR6<sup>+</sup> and CCR6<sup>-</sup> were sorted from HIV-uninfected donors, as described in Figure 1, and stimulated for 4 days *via* CD3/CD28 in presence/absence of ATRA (10 nM). **(A)** TNF- $\alpha$  levels were measured by ELISA (mean $\pm$ SEM) in cell culture supernatants ( $n=10$ ). **(B)** Nuclear and cytoplasmic fractions were separated using the BD transfactor extraction kit. The active form of NF- $\kappa$ B-p65 was quantified in the nuclear fractions using an activity-based ELISA assay; the specificity of NF- $\kappa$ B-p65 DNA-binding activity was determined using wild type and mutated NF- $\kappa$ B-p65 duplex competitors (data not shown). Shown is the NF- $\kappa$ B-p65 DNA-binding activity in nuclear extracts ( $n=3$ ; mean $\pm$ SD of triplicate wells). RM one-way ANOVA  $p$ -values **(A)** or ordinary one-way ANOVA **(B)** with the significance of the Tukey's multiple comparisons test are indicated on the figures. Each symbol represents one different donor **(A)** or one triplicate value **(B)**.

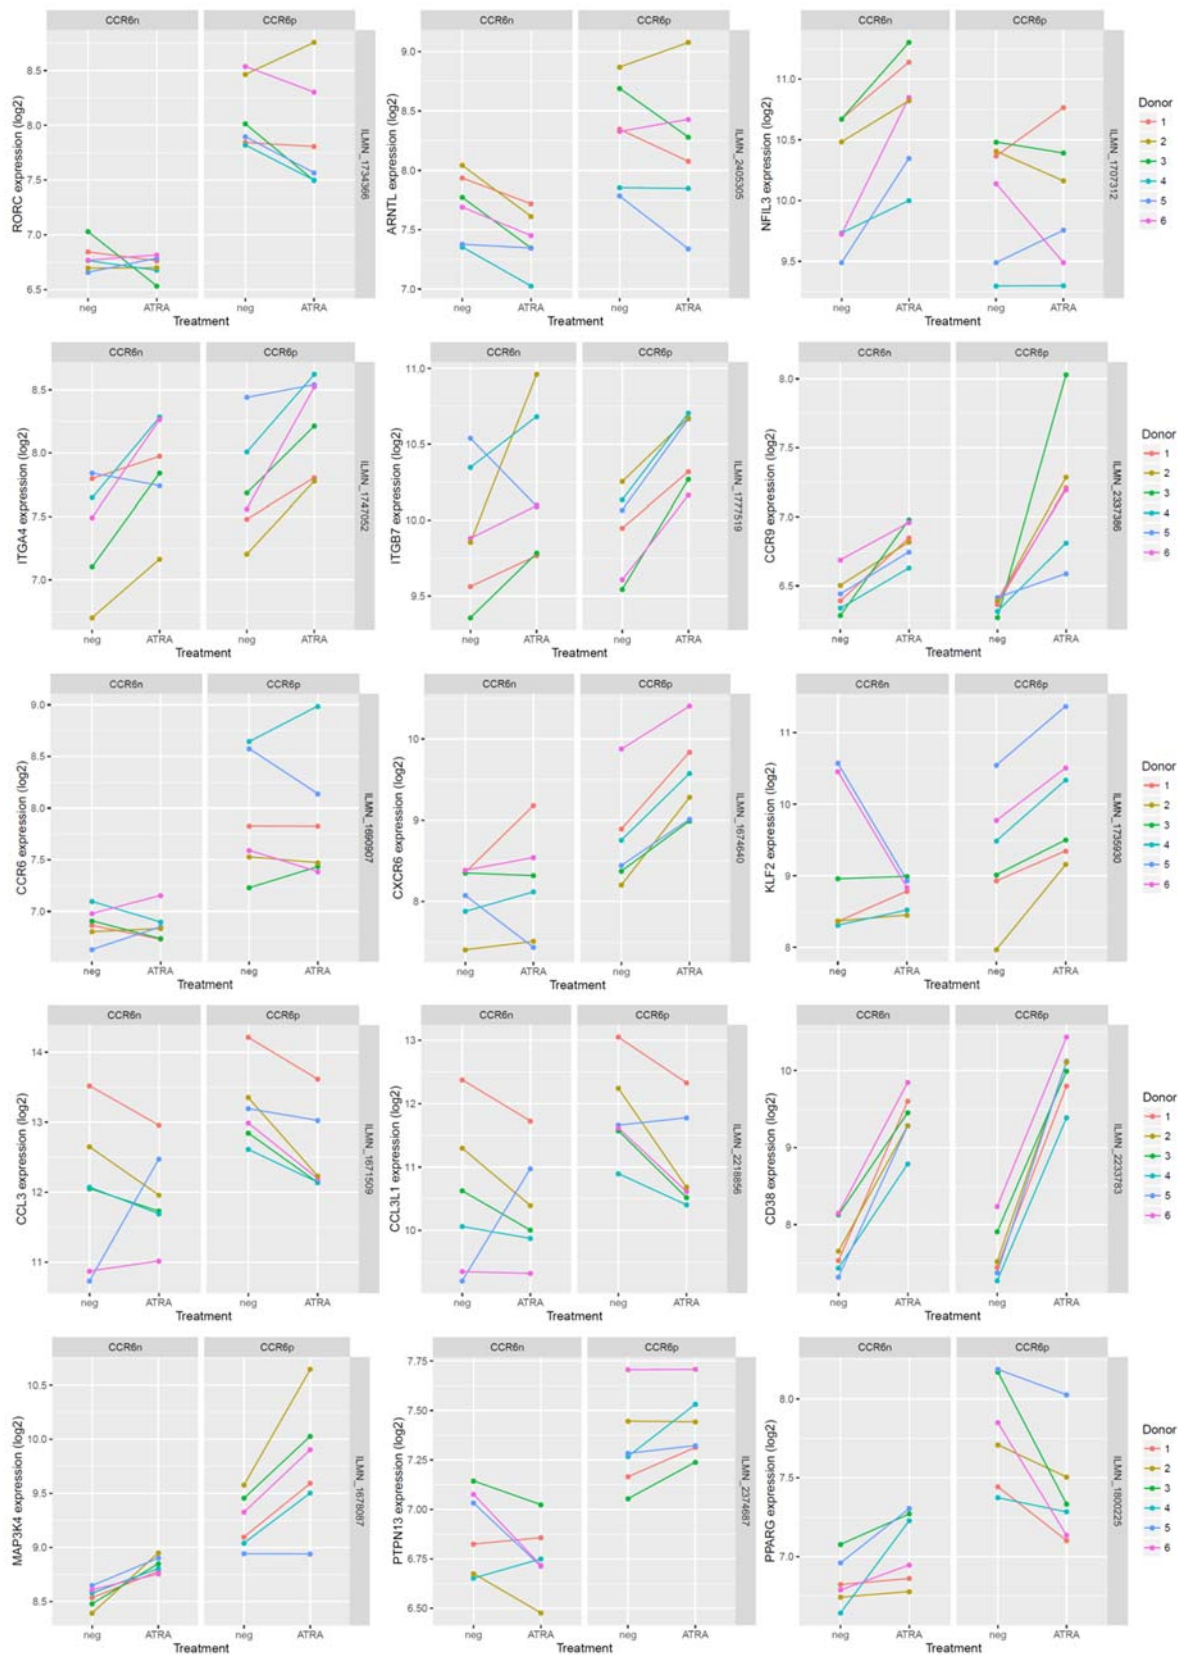

**Suppl. Figure 3: ATRA promotes differential gene expression in CCR6<sup>-</sup> and CCR6<sup>+</sup> T-cells.** Genome-wide transcriptional profiles were generated as described in Figure 3. Probe sets differentially expressed between CCR6<sup>+</sup> versus CCR6<sup>-</sup> T-cells were identified based on p-values (<0.05) and FC ratios (1.3 cut-off). Shown are line plots of Log<sub>2</sub> FC values in gene expression of n=15 selected genes. Results from each donor are indicated with a different color code (n=6).

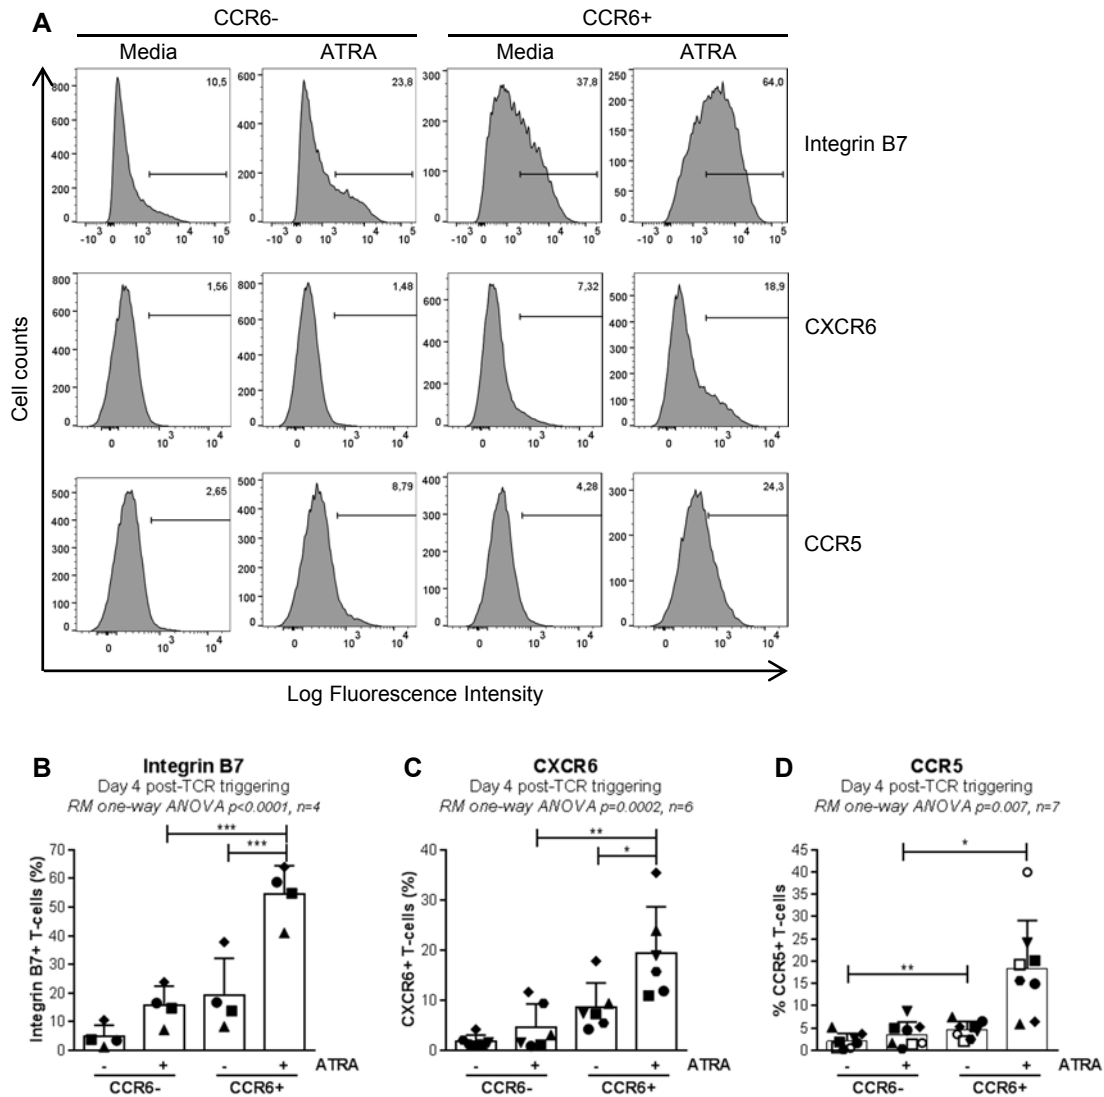

**Suppl. Figure 4: ATRA preferentially up-regulates integrin  $\beta 7$ , CXCR6, and CCR5 expression on CCR6<sup>+</sup> T-cells.** Memory CCR6<sup>+</sup> and CCR6<sup>-</sup> T cells were sorted and stimulated via CD3/CD28 in the presence/absence of ATRA (10 nM) for 4 days as described in Figure 1. The expression of integrin  $\beta 7$ , CXCR6 and CCR5 was analyzed by flow cytometry. Shown are histograms from one representative donor (A) and statistical analysis of integrin  $\beta 7$  (B,  $n = 4$ ), CXCR6 (C,  $n = 6$ ) and CCR5 (D,  $n = 7$ ) expression in different HIV-uninfected individuals (each symbol represents one different donor; mean  $\pm$  SEM). (B, C, D) RM one-way ANOVA  $p$ -values with the significance of the Tukey's multiple comparisons test are indicated on the figures. Each symbol represents one different donor.

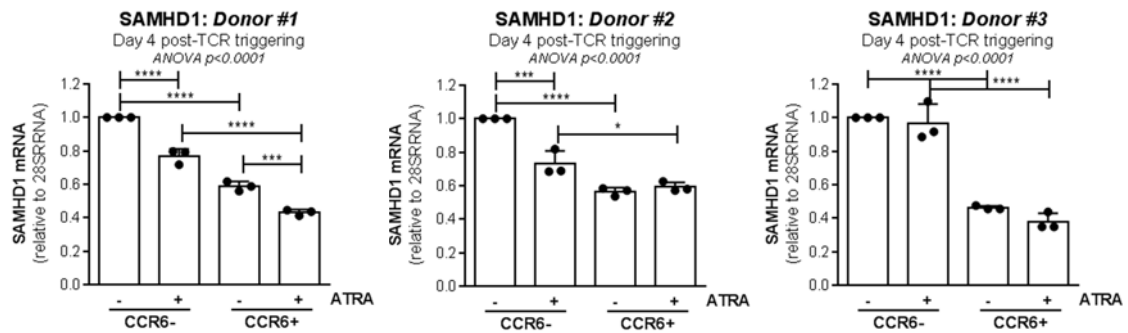

**Suppl. Figure 5: CCR6<sup>+</sup> versus CCR6<sup>-</sup> T-cells express lower levels of SAMHD1 mRNA.** Memory CCR6<sup>+</sup> and CCR6<sup>-</sup> T cells were sorted and stimulated as described in Figure 1. Four days post-TCR-triggering, RNA from cells was extracted and SAMHD1 mRNA quantification was performed by SYBR Green real-time RT-PCR. Results were generated with cells from n=3 different HIV-uninfected individuals (mean±SD of triplicate wells). One-way ANOVA p-values and the significance of the Tukey's multiple comparisons test are indicated on the figures. Each symbol represents one triplicate value.

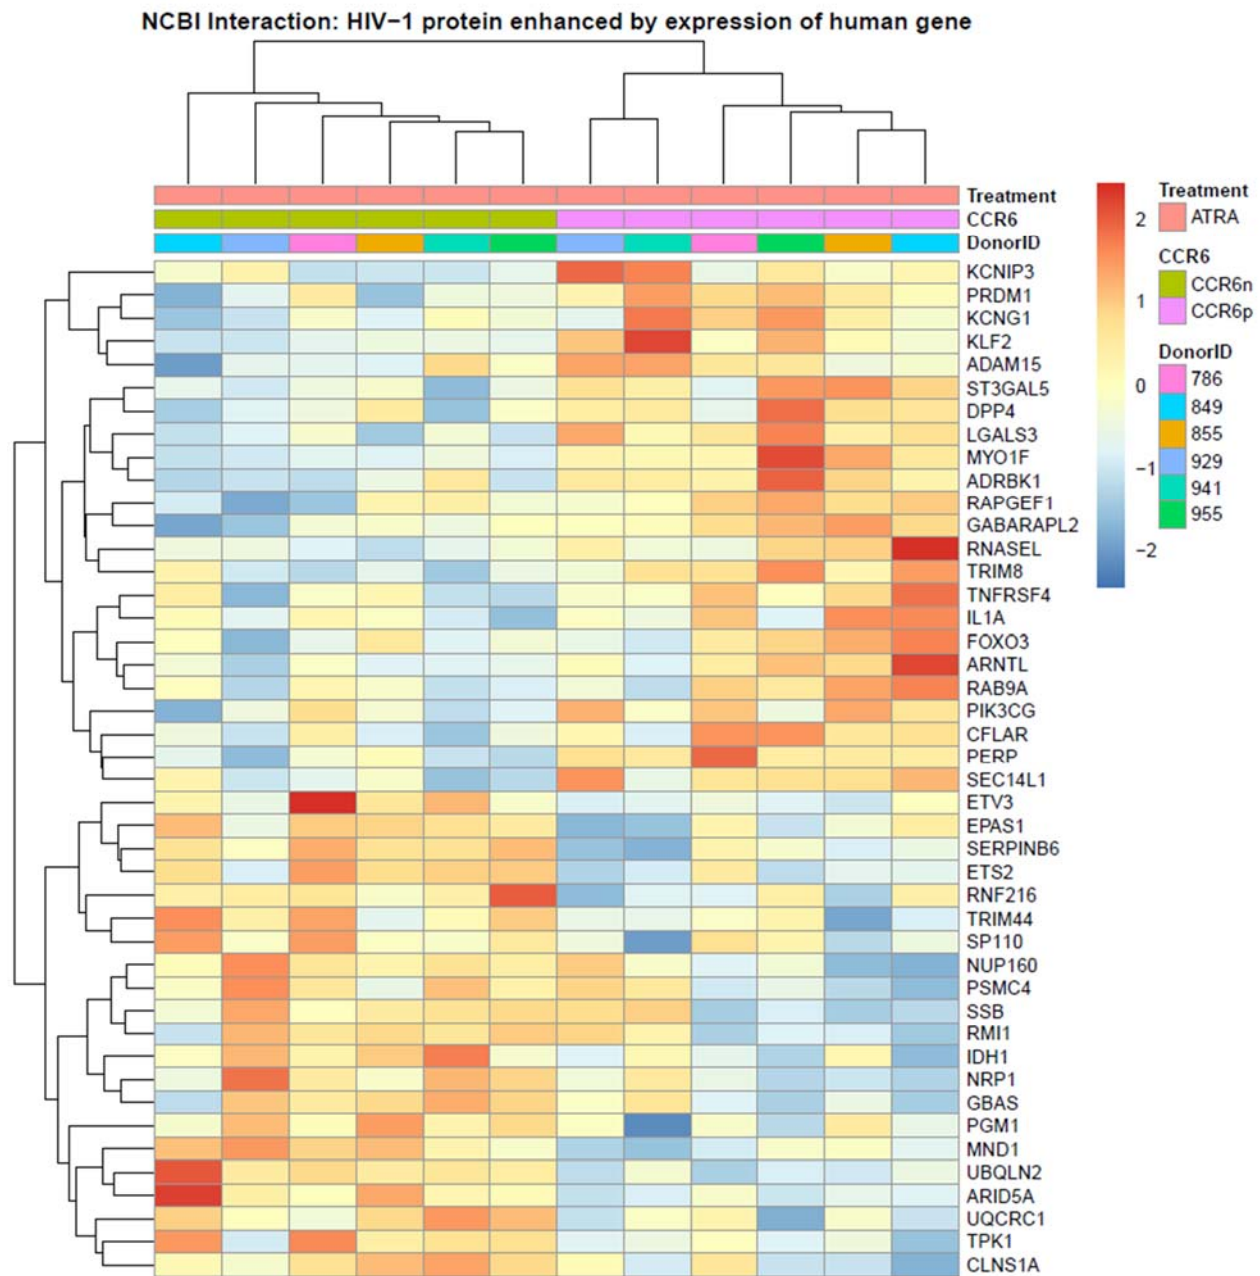

**Suppl. Figure 6:** Meta-analysis using the NCBI HIV interaction database identifying HIV-1 proteins enhanced by expression of human genes in ATRA-treated T-cells. Genome-wide transcriptional profiles were generated as described in [Figure 3](#). Differentially expressed genes between ATRA-treated CCR6<sup>+</sup> and ATRA-treated CCR6<sup>-</sup> ( $p < 0.05$ , FC cut-off 1.3) were matched to the lists of human genes previously identified to interact with HIV-1 proteins. Shown are significant probes with the smallest p-values for each overlapping gene. Heatmap cells are scaled by the expression level z-scores for each probe individually. Results from each donor are indicated with a different color code ( $n=6$ ).

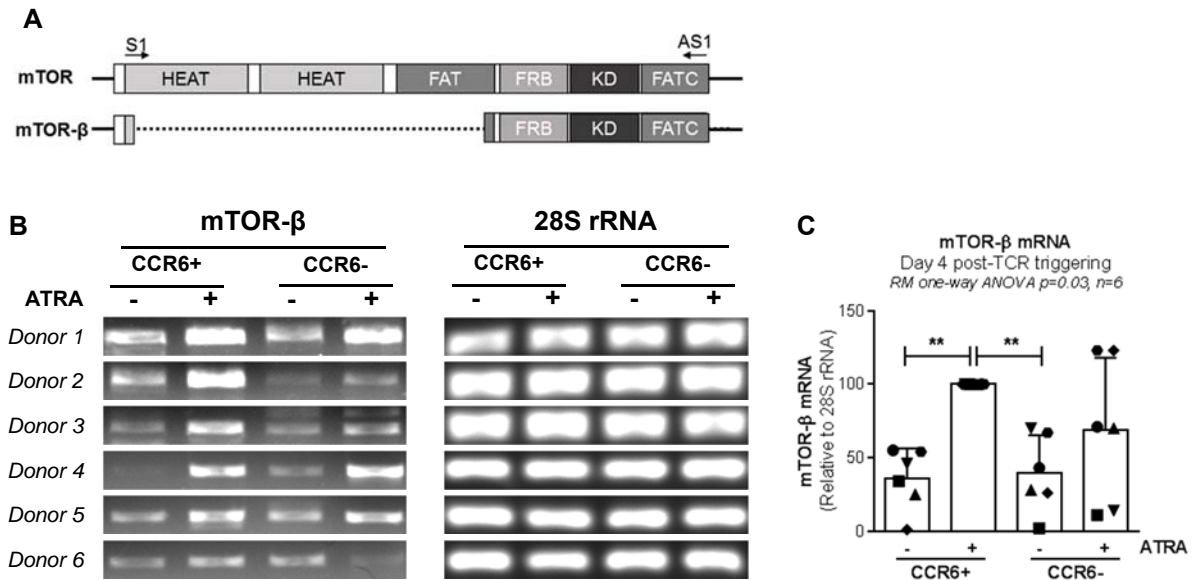

**Suppl. Figure 7: Increased expression of mTOR-β mRNA in memory CCR6<sup>+</sup> T-cells upon exposure to ATRA.** **(A)** Schematic representation of domain organization of the full-length mTOR (2,549 amino-acids) and the mTOR-β splicing isoform (706 amino-acids) and the localization of primers used for semi-quantitative RT-PCR. **(B)** Memory CCR6<sup>+</sup> and CCR6<sup>-</sup> T cells were sorted and stimulated as described in Figure 1. Four days post-TCR-triggering, cells were harvested and total RNA was extracted. A set of mTOR primers previously described (S1 and AS1; Panasyuk *et al.*, JBC, 2009) to amplify the coding sequence of mTOR-β was used for semi-quantitative RT-PCR reactions. A set of primers specific for 28S rRNA were used in parallel for the normalization of mTOR-β mRNA. **(B)** Shown are levels of mTOR mRNA (left panels; 2,118 Kb) and 28S rRNA (right panels; 100 Kb), as visualized by agarose gel electrophoresis, and **(C)** statistical analysis of mTOR-β expression relative to 28S rRNA quantified by densitometry. Results were generated with cells from  $n=6$  different HIV-uninfected individuals (mean $\pm$ SEM). **(C)** RM one-way ANOVA  $p$ -values and the significance of the Tukey's multiple comparisons test are indicated on the figures. Each symbol represents one different donor.



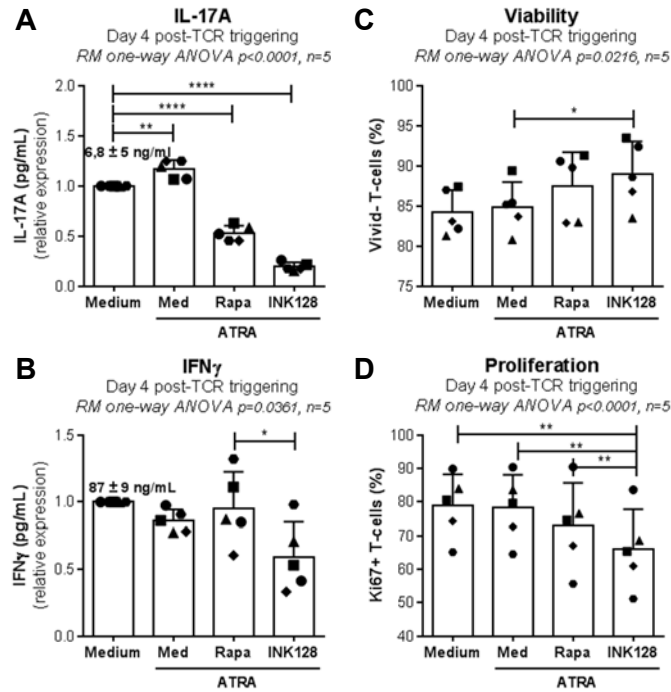

**Suppl. Figure 8: mTOR inhibitors strongly inhibit IL-17A production without interfering with cell viability, cell cycle progression, and IFN- $\gamma$  production.** Memory CD4<sup>+</sup> T-cells were sorted and stimulated in the presence/absence of ATRA, rapamycin and/or INK128 for 4 days, as in Figure 4. **(A-B)** Levels of IL-17A and IFN- $\gamma$  were quantified in cell culture supernatants by ELISA. Shown are IL-17A **(A)** or IFN- $\gamma$  **(B)** production (mean $\pm$ SEM;  $n=5$ ) relative to memory CD4<sup>+</sup> T-cells untreated (Medium; considered as 1), with the range of IL-17A and IFN- $\gamma$  absolute values and paired t-test p-values being indicated. In parallel, cells were stained on the surface with a viability dye and intracellular using Ki67 Abs at day 4 post-stimulation. Shown are statistical analysis of **(C)** cell viability (vivid-) and **(D)** cell cycle progression (Ki67<sup>+</sup>) (mean $\pm$ SEM;  $n=5$ ). RM one-way ANOVA p-values and the significance of the Tukey's multiple comparisons test are indicated on the figures. Each symbol represents one different donor.

| <b>Supplemental Table 1: Transcripts differentially expressed by CCR6+ versus CCR6- T-cells upon TCR triggering in the absence of ATRA</b> |               |           |              |                                                                                                            |
|--------------------------------------------------------------------------------------------------------------------------------------------|---------------|-----------|--------------|------------------------------------------------------------------------------------------------------------|
| <b>ProbeID</b>                                                                                                                             | <b>SYMBOL</b> | <b>FC</b> | <b>adj.P</b> | <b>Definition</b>                                                                                          |
| 4220246                                                                                                                                    | CCL20         | 11,9      | 2E-13        | Homo sapiens chemokine (C-C motif) ligand 20 (CCL20), mRNA.                                                |
| 730753                                                                                                                                     | IL22          | 10,6      | 3E-10        | Homo sapiens interleukin 22 (IL22), mRNA.                                                                  |
| 5360682                                                                                                                                    | IL17F         | 9,9       | 2E-04        | Homo sapiens interleukin 17F (IL17F), mRNA.                                                                |
| 6590332                                                                                                                                    | IL22          | 6,9       | 1E-08        | Homo sapiens interleukin 22 (IL22), mRNA.                                                                  |
| 1980288                                                                                                                                    | CTSH          | 6,2       | 4E-15        | Homo sapiens cathepsin H (CTSH), transcript variant 1, mRNA.                                               |
| 6200019                                                                                                                                    | KLRB1         | 4,6       | 4E-06        | Homo sapiens killer cell lectin-like receptor subfamily B, member 1 (KLRB1), mRNA.                         |
| 4670162                                                                                                                                    | CTSH          | 4,2       | 2E-13        | Homo sapiens cathepsin H (CTSH), transcript variant 1, mRNA.                                               |
| 540670                                                                                                                                     | IL4I1         | 4,0       | 2E-10        | Homo sapiens interleukin 4 induced 1 (IL4I1), transcript variant 2, mRNA.                                  |
| 630725                                                                                                                                     | IFNG          | 3,1       | 1E-04        | Homo sapiens interferon, gamma (IFNG), mRNA.                                                               |
| 1980309                                                                                                                                    | IL8           | 3,0       | 7E-04        | Homo sapiens interleukin 8 (IL8), mRNA.                                                                    |
| 70551                                                                                                                                      | IQCG          | 3,0       | 3E-05        | Homo sapiens IQ motif containing G (IQCG), mRNA.                                                           |
| 1110180                                                                                                                                    | RORA          | 2,7       | 8E-05        | Homo sapiens RAR-related orphan receptor A (RORA), transcript variant 3, mRNA.                             |
| 2750196                                                                                                                                    | CSF2          | 2,7       | 8E-04        | Homo sapiens colony stimulating factor 2 (granulocyte-macrophage) (CSF2), mRNA.                            |
| 6550008                                                                                                                                    | IL26          | 2,6       | 7E-07        | Homo sapiens interleukin 26 (IL26), mRNA.                                                                  |
| 610524                                                                                                                                     | CCL3L1        | 2,6       | 5E-03        | Homo sapiens chemokine (C-C motif) ligand 3-like 1 (CCL3L1), mRNA.                                         |
| 5490768                                                                                                                                    | GPR56         | 2,5       | 1E-03        | Homo sapiens G protein-coupled receptor 56 (GPR56), transcript variant 3, mRNA.                            |
| 1570553                                                                                                                                    | IL8           | 2,5       | 7E-04        | Homo sapiens interleukin 8 (IL8), mRNA.                                                                    |
| 4250053                                                                                                                                    | CCL3L1        | 2,5       | 2E-03        | Homo sapiens chemokine (C-C motif) ligand 3-like 1 (CCL3L1), mRNA.                                         |
| 5360064                                                                                                                                    | GNLY          | 2,5       | 2E-03        | Homo sapiens granulysin (GNLY), transcript variant 519, mRNA.                                              |
| 4070091                                                                                                                                    | RORC          | 2,5       | 6E-07        | Homo sapiens RAR-related orphan receptor C (RORC), transcript variant 2, mRNA.                             |
| 4890241                                                                                                                                    | GPR56         | 2,5       | 2E-03        | Homo sapiens G protein-coupled receptor 56 (GPR56), transcript variant 2, mRNA.                            |
| 2000129                                                                                                                                    | TMPRSS6       | 2,4       | 2E-02        | Homo sapiens transmembrane protease, serine 6 (TMPRSS6), mRNA.                                             |
| 3780053                                                                                                                                    | PALLD         | 2,3       | 2E-04        | Homo sapiens palladin, cytoskeletal associated protein (PALLD), transcript variant 2, mRNA.                |
| 2810010                                                                                                                                    | CCL3L3        | 2,3       | 4E-03        | Homo sapiens chemokine (C-C motif) ligand 3-like 3 (CCL3L3), mRNA.                                         |
| 7200703                                                                                                                                    | KAT2B         | 2,3       | 5E-08        | Homo sapiens K(lysine) acetyltransferase 2B (KAT2B), mRNA.                                                 |
| 6590682                                                                                                                                    | CCL3          | 2,3       | 4E-03        | Homo sapiens chemokine (C-C motif) ligand 3 (CCL3), mRNA.                                                  |
| 6560201                                                                                                                                    | LOC728835     | 2,3       | 1E-02        | PREDICTED: Homo sapiens similar to cytokine, transcript variant 3 (LOC728835), mRNA.                       |
| 6370356                                                                                                                                    | EEF1A2        | 2,3       | 2E-02        | Homo sapiens eukaryotic translation elongation factor 1 alpha 2 (EEF1A2), mRNA.                            |
| 6400564                                                                                                                                    | HS.560343     | 2,2       | 2E-04        | Homo sapiens mRNA; cDNA DKFZp686M2414 (from clone DKFZp686M2414)                                           |
| 6580041                                                                                                                                    | GNLY          | 2,2       | 1E-02        | Homo sapiens granulysin (GNLY), transcript variant NKG5, mRNA.                                             |
| 840386                                                                                                                                     | TNFRSF18      | 2,1       | 8E-03        | Homo sapiens tumor necrosis factor receptor superfamily, member 18 (TNFRSF18), transcript variant 2, mRNA. |
| 630161                                                                                                                                     | RCAN2         | 2,1       | 5E-04        | Homo sapiens regulator of calcineurin 2 (RCAN2), mRNA.                                                     |
| 4390450                                                                                                                                    | SGK           | 2,1       | 2E-03        | Homo sapiens serum/glucocorticoid regulated kinase (SGK), mRNA.                                            |
| 10685                                                                                                                                      | ANTXR2        | 2,1       | 1E-05        | Homo sapiens anthrax toxin receptor 2 (ANTXR2), mRNA.                                                      |
| 5860093                                                                                                                                    | NLF2          | 2,1       | 5E-04        | PREDICTED: Homo sapiens nuclear localized factor 2 (NLF2), mRNA.                                           |

|         |          |     |       |                                                                                                                             |
|---------|----------|-----|-------|-----------------------------------------------------------------------------------------------------------------------------|
| 2970575 | CCL4L2   | 2,0 | 1E-02 | Homo sapiens chemokine (C-C motif) ligand 4-like 2 (CCL4L2), mRNA.                                                          |
| 5890470 | CCR6     | 2,0 | 6E-04 | Homo sapiens chemokine (C-C motif) receptor 6 (CCR6), transcript variant 2, mRNA.                                           |
| 1410209 | SGK1     | 2,0 | 2E-03 | Homo sapiens serum/glucocorticoid regulated kinase 1 (SGK1), transcript variant 1, mRNA.                                    |
| 4890553 | RORC     | 1,9 | 3E-06 | Homo sapiens RAR-related orphan receptor C (RORC), transcript variant 2, mRNA.                                              |
| 1570484 | ATF5     | 1,9 | 1E-03 | Homo sapiens activating transcription factor 5 (ATF5), mRNA.                                                                |
| 520066  | TNFRSF18 | 1,9 | 1E-02 | Homo sapiens tumor necrosis factor receptor superfamily, member 18 (TNFRSF18), transcript variant 3, mRNA.                  |
| 830019  | PPARG    | 1,9 | 3E-06 | Homo sapiens peroxisome proliferator-activated receptor gamma (PPARG), transcript variant 2, mRNA.                          |
| 670255  | GADD45A  | 1,9 | 1E-02 | Homo sapiens growth arrest and DNA-damage-inducible, alpha (GADD45A), mRNA.                                                 |
| 2030324 | SGK1     | 1,9 | 3E-03 | Homo sapiens serum/glucocorticoid regulated kinase 1 (SGK1), transcript variant 1, mRNA.                                    |
| 5290040 | TNFRSF4  | 1,9 | 3E-03 | Homo sapiens tumor necrosis factor receptor superfamily, member 4 (TNFRSF4), mRNA.                                          |
| 3800019 | NCR3     | 1,9 | 3E-04 | Homo sapiens natural cytotoxicity triggering receptor 3 (NCR3), mRNA.                                                       |
| 1230201 | CTLA4    | 1,9 | 3E-03 | Homo sapiens cytotoxic T-lymphocyte-associated protein 4 (CTLA4), transcript variant 1, mRNA.                               |
| 2680189 | LAG3     | 1,9 | 3E-02 | Homo sapiens lymphocyte-activation gene 3 (LAG3), mRNA.                                                                     |
| 5670040 | ELOVL6   | 1,9 | 1E-05 | Homo sapiens ELOVL family member 6, elongation of long chain fatty acids (FEN1/Elo2, SUR4/Elo3-like, yeast), mRNA.          |
| 3940435 | EMP1     | 1,9 | 2E-04 | Homo sapiens epithelial membrane protein 1 (EMP1), mRNA.                                                                    |
| 5420091 | LTB      | 1,9 | 6E-04 | Homo sapiens lymphotoxin beta (TNF superfamily, member 3) (LTB), transcript variant 1, mRNA.                                |
| 4880673 | GADD45A  | 1,9 | 1E-02 | Homo sapiens growth arrest and DNA-damage-inducible, alpha (GADD45A), mRNA.                                                 |
| 7380273 | GPR114   | 1,9 | 2E-04 | Homo sapiens G protein-coupled receptor 114 (GPR114), mRNA.                                                                 |
| 4010768 | CTLA4    | 1,9 | 5E-03 | Homo sapiens cytotoxic T-lymphocyte-associated protein 4 (CTLA4), transcript variant 1, mRNA.                               |
| 6770673 | SOCS2    | 1,8 | 5E-04 | Homo sapiens suppressor of cytokine signaling 2 (SOCS2), mRNA.                                                              |
| 4220068 | CD70     | 1,8 | 1E-05 | Homo sapiens CD70 molecule (CD70), mRNA.                                                                                    |
| 7050019 | VIM      | 1,8 | 2E-04 | Homo sapiens vimentin (VIM), mRNA.                                                                                          |
| 870630  | CA2      | 1,8 | 2E-04 | Homo sapiens carbonic anhydrase II (CA2), mRNA.                                                                             |
| 5420377 | LGALS3   | 1,8 | 1E-04 | Homo sapiens lectin, galactoside-binding, soluble, 3 (galectin 3) (LGALS3), mRNA.                                           |
| 3140088 | IL23R    | 1,8 | 1E-05 | Homo sapiens interleukin 23 receptor (IL23R), mRNA.                                                                         |
| 4490673 | TWIST1   | 1,8 | 4E-04 | Homo sapiens twist homolog 1 (Drosophila) (TWIST1), mRNA.                                                                   |
| 270068  | SMOX     | 1,8 | 9E-04 | Homo sapiens spermine oxidase (SMOX), transcript variant 4, mRNA.                                                           |
| 2230379 | NAMPT    | 1,8 | 9E-03 | Homo sapiens nicotinamide phosphoribosyltransferase (NAMPT), mRNA.                                                          |
| 4250678 | MGC16121 | 1,8 | 8E-03 | PREDICTED: Homo sapiens hypothetical protein MGC16121 (MGC16121), mRNA.                                                     |
| 5700753 | CEACAM1  | 1,8 | 2E-05 | Homo sapiens carcinoembryonic antigen-related cell adhesion molecule 1 (CEACAM1), transcript variant 2, mRNA.               |
| 4220468 | ATP1B1   | 1,8 | 3E-02 | Homo sapiens ATPase, Na <sup>+</sup> /K <sup>+</sup> transporting, beta 1 polypeptide (ATP1B1), transcript variant 2, mRNA. |
| 520553  | NCALD    | 1,8 | 6E-03 | Homo sapiens neurocalcin delta (NCALD), transcript variant 3, mRNA.                                                         |
| 7560273 | ZBTB32   | 1,8 | 1E-02 | Homo sapiens zinc finger and BTB domain containing 32 (ZBTB32), mRNA.                                                       |
| 3290008 | ERN1     | 1,8 | 1E-02 | Homo sapiens endoplasmic reticulum to nucleus signalling 1 (ERN1), transcript variant 2, mRNA.                              |
| 610332  | CHN1     | 1,8 | 2E-04 | Homo sapiens chimerin (chimaerin) 1 (CHN1), transcript variant 2, mRNA.                                                     |
| 2030687 | C3ORF59  | 1,8 | 2E-04 | Homo sapiens chromosome 3 open reading frame 59 (C3orf59), mRNA.                                                            |
| 3710553 | SMOX     | 1,7 | 4E-04 | Homo sapiens spermine oxidase (SMOX), transcript variant 2, mRNA.                                                           |

|         |           |     |       |                                                                                                                             |
|---------|-----------|-----|-------|-----------------------------------------------------------------------------------------------------------------------------|
| 650328  | TNFRSF4   | 1,7 | 6E-04 | Homo sapiens tumor necrosis factor receptor superfamily, member 4 (TNFRSF4), mRNA.                                          |
| 6060482 | ATP1B1    | 1,7 | 8E-03 | Homo sapiens ATPase, Na+/K+ transporting, beta 1 polypeptide (ATP1B1), transcript variant 1, mRNA.                          |
| 1030743 | LTA       | 1,7 | 1E-02 | Homo sapiens lymphotoxin alpha (TNF superfamily, member 1) (LTA), transcript variant 2, mRNA.                               |
| 770682  | MGC29506  | 1,7 | 1E-03 | Homo sapiens hypothetical protein MGC29506 (MGC29506), mRNA.                                                                |
| 4180452 | ATP1B1    | 1,7 | 1E-02 | Homo sapiens ATPase, Na+/K+ transporting, beta 1 polypeptide (ATP1B1), transcript variant 1, mRNA.                          |
| 7210170 | DSE       | 1,7 | 3E-03 | Homo sapiens dermatan sulfate epimerase (DSE), transcript variant 1, mRNA.                                                  |
| 6510026 | IL23A     | 1,7 | 4E-02 | Homo sapiens interleukin 23, alpha subunit p19 (IL23A), mRNA.                                                               |
| 3140520 | TMOD1     | 1,7 | 3E-02 | Homo sapiens tropomodulin 1 (TMOD1), mRNA.                                                                                  |
| 2570402 | KIF5C     | 1,7 | 2E-04 | Homo sapiens kinesin family member 5C (KIF5C), mRNA.                                                                        |
| 380019  | DDIT4L    | 1,7 | 2E-02 | Homo sapiens DNA-damage-inducible transcript 4-like (DDIT4L), mRNA.                                                         |
| 60093   | NCALD     | 1,7 | 1E-02 | Homo sapiens neurocalcin delta (NCALD), mRNA.                                                                               |
| 4780128 | ATF3      | 1,7 | 2E-02 | Homo sapiens activating transcription factor 3 (ATF3), transcript variant 4, mRNA.                                          |
| 610270  | ELL2      | 1,7 | 7E-05 | Homo sapiens elongation factor, RNA polymerase II, 2 (ELL2), mRNA.                                                          |
| 6520180 | IL18RAP   | 1,7 | 3E-02 | Homo sapiens interleukin 18 receptor accessory protein (IL18RAP), mRNA.                                                     |
| 6660382 | CDKN1A    | 1,7 | 2E-03 | Homo sapiens cyclin-dependent kinase inhibitor 1A (p21, Cip1) (CDKN1A), transcript variant 1, mRNA.                         |
| 1470762 | AUTS2     | 1,7 | 6E-06 | Homo sapiens autism susceptibility candidate 2 (AUTS2), mRNA.                                                               |
| 5900725 | PHLDA1    | 1,7 | 4E-03 | Homo sapiens pleckstrin homology-like domain, family A, member 1 (PHLDA1), mRNA.                                            |
| 7650524 | BCAT1     | 1,7 | 2E-02 | Homo sapiens branched chain aminotransferase 1, cytosolic (BCAT1), mRNA.                                                    |
| 5860356 | PTPRM     | 1,7 | 5E-04 | Homo sapiens protein tyrosine phosphatase, receptor type, M (PTPRM), mRNA.                                                  |
| 1230070 | NDRG1     | 1,6 | 3E-02 | Homo sapiens N-myc downstream regulated gene 1 (NDRG1), mRNA.                                                               |
| 6650722 | IL23R     | 1,6 | 7E-05 | Homo sapiens interleukin 23 receptor (IL23R), mRNA.                                                                         |
| 830593  | VIM       | 1,6 | 3E-04 | Homo sapiens vimentin (VIM), mRNA.                                                                                          |
| 5810136 | SLAMF1    | 1,6 | 2E-03 | Homo sapiens signaling lymphocytic activation molecule family member 1 (SLAMF1), mRNA.                                      |
| 4830255 | DPP4      | 1,6 | 2E-03 | Homo sapiens dipeptidyl-peptidase 4 (DPP4), mRNA.                                                                           |
| 2750367 | PMAIP1    | 1,6 | 3E-02 | Homo sapiens phorbol-12-myristate-13-acetate-induced protein 1 (PMAIP1), mRNA.                                              |
| 2060674 | CA2       | 1,6 | 2E-03 | Homo sapiens carbonic anhydrase II (CA2), mRNA.                                                                             |
| 7160010 | RNF19A    | 1,6 | 3E-02 | Homo sapiens ring finger protein 19A (RNF19A), transcript variant 2, mRNA.                                                  |
| 6400333 | CTLA4     | 1,6 | 1E-02 | Homo sapiens cytotoxic T-lymphocyte-associated protein 4 (CTLA4), transcript variant 1, mRNA.                               |
| 2810767 | EBI3      | 1,6 | 2E-02 | Homo sapiens Epstein-Barr virus induced 3 (EBI3), mRNA.                                                                     |
| 1980672 | IL1A      | 1,6 | 9E-03 | Homo sapiens interleukin 1, alpha (IL1A), mRNA.                                                                             |
| 7320731 | MAP3K4    | 1,6 | 3E-03 | Homo sapiens mitogen-activated protein kinase kinase kinase 4 (MAP3K4), transcript variant 1, mRNA.                         |
| 5310053 | LTB       | 1,6 | 1E-02 | Homo sapiens lymphotoxin beta (TNF superfamily, member 3) (LTB), transcript variant 1, mRNA.                                |
| 7550112 | CITED2    | 1,6 | 2E-04 | Homo sapiens Cbp/p300-interacting transactivator, with Glu/Asp-rich carboxy-terminal domain, 2, transcript variant 1, mRNA. |
| 5860204 | FKBP11    | 1,6 | 2E-04 | Homo sapiens FK506 binding protein 11, 19 kDa (FKBP11), mRNA.                                                               |
| 6550333 | CXCR6     | 1,6 | 3E-02 | Homo sapiens chemokine (C-X-C motif) receptor 6 (CXCR6), mRNA.                                                              |
| 450674  | C10ORF128 | 1,6 | 1E-02 | PREDICTED: Homo sapiens chromosome 10 open reading frame 128, transcript variant 5 (C10orf128), mRNA.                       |
| 3890138 | MTMR11    | 1,6 | 2E-02 | Homo sapiens myotubularin related protein 11 (MTMR11), mRNA.                                                                |

|         |           |     |       |                                                                                                                         |
|---------|-----------|-----|-------|-------------------------------------------------------------------------------------------------------------------------|
| 2070037 | ICOS      | 1,6 | 7E-05 | Homo sapiens inducible T-cell co-stimulator (ICOS), mRNA.                                                               |
| 4260386 | CTSL1     | 1,6 | 4E-02 | Homo sapiens cathepsin L1 (CTSL1), transcript variant 2, mRNA.                                                          |
| 2760544 | PBX4      | 1,6 | 2E-02 | Homo sapiens pre-B-cell leukemia homeobox 4 (PBX4), mRNA.                                                               |
| 2640301 | TNF       | 1,6 | 3E-03 | Homo sapiens tumor necrosis factor (TNF superfamily, member 2) (TNF), mRNA.                                             |
| 1770114 | PDE4D     | 1,6 | 3E-02 | Homo sapiens phosphodiesterase 4D, cAMP-specific (phosphodiesterase E3 dunce homolog, Drosophila) (PDE4D), mRNA.        |
| 5670424 | GNA15     | 1,6 | 5E-03 | Homo sapiens guanine nucleotide binding protein (G protein), alpha 15 (Gq class) (GNA15), mRNA.                         |
| 10332   | HIPK2     | 1,6 | 4E-04 | Homo sapiens homeodomain interacting protein kinase 2 (HIPK2), mRNA.                                                    |
| 5910523 | LMO4      | 1,6 | 2E-04 | Homo sapiens LIM domain only 4 (LMO4), mRNA.                                                                            |
| 1440437 | LOC151162 | 1,6 | 1E-05 | Homo sapiens hypothetical LOC151162 (LOC151162), non-coding RNA.                                                        |
| 4670193 | PRF1      | 1,6 | 1E-02 | Homo sapiens perforin 1 (pore forming protein) (PRF1), transcript variant 1, mRNA.                                      |
| 3930750 | IRAK2     | 1,6 | 2E-02 | Homo sapiens interleukin-1 receptor-associated kinase 2 (IRAK2), mRNA.                                                  |
| 2070039 | INSIG2    | 1,6 | 2E-02 | Homo sapiens insulin induced gene 2 (INSIG2), mRNA.                                                                     |
| 4210397 | GLDC      | 1,6 | 1E-02 | Homo sapiens glycine dehydrogenase (decarboxylating) (GLDC), mRNA.                                                      |
| 2450554 | RBPJ      | 1,6 | 2E-04 | Homo sapiens recombination signal binding protein for immunoglobulin kappa J region (RBPJ), transcript variant 4, mRNA. |
| 7510377 | MSC       | 1,6 | 1E-02 | Homo sapiens musculin (activated B-cell factor-1) (MSC), mRNA.                                                          |
| 3850246 | HOPX      | 1,6 | 4E-02 | Homo sapiens HOP homeobox (HOPX), transcript variant 3, mRNA.                                                           |
| 1690692 | SOCS2     | 1,6 | 3E-03 | Homo sapiens suppressor of cytokine signaling 2 (SOCS2), mRNA.                                                          |
| 3120370 | CD68      | 1,6 | 4E-02 | Homo sapiens CD68 antigen (CD68), mRNA.                                                                                 |
| 6220746 | GLIPR1    | 1,6 | 9E-03 | Homo sapiens GLI pathogenesis-related 1 (GLIPR1), mRNA.                                                                 |
| 2100296 | NAPSA     | 1,6 | 2E-02 | Homo sapiens napsin A aspartic peptidase (NAPSA), mRNA.                                                                 |
| 5860722 | MIR155HG  | 1,6 | 2E-02 | Homo sapiens MIR155 host gene (non-protein coding) (MIR155HG), non-coding RNA.                                          |
| 7380181 | ELOVL6    | 1,6 | 4E-05 | Homo sapiens ELOVL family member 6, elongation of long chain fatty acids (FEN1/Elo2, SUR4/Elo3-like, yeast), mRNA.      |
| 3060523 | NAMPT     | 1,5 | 4E-02 | Homo sapiens nicotinamide phosphoribosyltransferase (NAMPT), mRNA.                                                      |
| 6220288 | PRDM1     | 1,5 | 4E-03 | Homo sapiens PR domain containing 1, with ZNF domain (PRDM1), transcript variant 1, mRNA.                               |
| 7380255 | ARAP3     | 1,5 | 2E-03 | Homo sapiens ArfGAP with RhoGAP domain, ankyrin repeat and PH domain 3 (ARAP3), mRNA.                                   |
| 6040626 | CA9       | 1,5 | 2E-02 | Homo sapiens carbonic anhydrase IX (CA9), mRNA.                                                                         |
| 380672  | ZC3H12C   | 1,5 | 1E-03 | Homo sapiens zinc finger CCCH-type containing 12C (ZC3H12C), mRNA.                                                      |
| 5670367 | PHLDA1    | 1,5 | 3E-02 | Homo sapiens pleckstrin homology-like domain, family A, member 1 (PHLDA1), mRNA.                                        |
| 3310142 | TTC39C    | 1,5 | 2E-03 | Homo sapiens tetratricopeptide repeat domain 39C (TTC39C), mRNA.                                                        |
| 3190133 | FTHL12    | 1,5 | 1E-02 | Homo sapiens ferritin, heavy polypeptide-like 12 (FTHL12) on chromosome 9.                                              |
| 7150519 | ARNTL     | 1,5 | 6E-03 | Homo sapiens aryl hydrocarbon receptor nuclear translocator-like (ARNTL), transcript variant 2, mRNA.                   |
| 4150520 | RIPK2     | 1,5 | 3E-03 | Homo sapiens receptor-interacting serine-threonine kinase 2 (RIPK2), mRNA.                                              |
| 5570114 | GADD45G   | 1,5 | 4E-03 | Homo sapiens growth arrest and DNA-damage-inducible, gamma (GADD45G), mRNA.                                             |
| 5220240 | FTH1      | 1,5 | 3E-03 | Homo sapiens ferritin, heavy polypeptide 1 (FTH1), mRNA.                                                                |
| 6480630 | ATP9A     | 1,5 | 3E-02 | Homo sapiens ATPase, class II, type 9A (ATP9A), mRNA.                                                                   |
| 990719  | HS.579530 | 1,5 | 8E-03 | AGENCOURT_14354957 NIH_MGC_191 Homo sapiens cDNA clone IMAGE:30413554 5, mRNA sequence                                  |
| 7570673 | UPP1      | 1,5 | 2E-02 | Homo sapiens uridine phosphorylase 1 (UPP1), transcript variant 1, mRNA.                                                |

|         |              |     |       |                                                                                                                         |
|---------|--------------|-----|-------|-------------------------------------------------------------------------------------------------------------------------|
| 4730181 | FTHL12       | 1,5 | 3E-02 | Homo sapiens ferritin, heavy polypeptide-like 12 (FTHL12) on chromosome 9.                                              |
| 3460008 | TMEM173      | 1,5 | 4E-04 | Homo sapiens transmembrane protein 173 (TMEM173), nuclear gene encoding mitochondrial protein, mRNA.                    |
| 1470520 | CMTM6        | 1,5 | 6E-04 | Homo sapiens CKLF-like MARVEL transmembrane domain containing 6 (CMTM6), mRNA.                                          |
| 3060128 | CHSY1        | 1,5 | 4E-03 | Homo sapiens chondroitin sulfate synthase 1 (CHSY1), mRNA.                                                              |
| 6510689 | HABP4        | 1,5 | 4E-04 | Homo sapiens hyaluronan binding protein 4 (HABP4), mRNA.                                                                |
| 4540086 | LOC100129066 | 1,5 | 2E-03 | Homo sapiens hypothetical LOC100129066 (LOC100129066), non-coding RNA.                                                  |
| 1470465 | DUSP16       | 1,5 | 3E-02 | Homo sapiens dual specificity phosphatase 16 (DUSP16), mRNA.                                                            |
| 1030102 | RGS16        | 1,5 | 7E-03 | Homo sapiens regulator of G-protein signalling 16 (RGS16), mRNA.                                                        |
| 7570408 | CCL5         | 1,5 | 4E-02 | Homo sapiens chemokine (C-C motif) ligand 5 (CCL5), mRNA.                                                               |
| 1230048 | ABCB1        | 1,5 | 4E-04 | Homo sapiens ATP-binding cassette, sub-family B (MDR/TAP), member 1 (ABCB1), mRNA.                                      |
| 4220767 | SMAD7        | 1,5 | 2E-04 | Homo sapiens SMAD family member 7 (SMAD7), mRNA.                                                                        |
| 1820328 | FERMT2       | 1,5 | 1E-03 | Homo sapiens fermitin family homolog 2 (Drosophila) (FERMT2), mRNA.                                                     |
| 2480577 | PDE4B        | 1,5 | 3E-04 | Homo sapiens phosphodiesterase 4B, cAMP-specific (phosphodiesterase E4 dunce homolog, Drosophila) (PDE4B)               |
| 5390161 | DUSP5        | 1,5 | 4E-02 | Homo sapiens dual specificity phosphatase 5 (DUSP5), mRNA.                                                              |
| 3610730 | KCNN4        | 1,5 | 1E-02 | Homo sapiens potassium intermediate/small conductance calcium-activated channel, subfamily N, member 4 (KCNN4), mRNA.   |
| 6180427 | G0S2         | 1,5 | 2E-02 | Homo sapiens G0/G1switch 2 (G0S2), mRNA.                                                                                |
| 940504  | RUNX2        | 1,5 | 4E-02 | Homo sapiens runt-related transcription factor 2 (RUNX2), transcript variant 1, mRNA.                                   |
| 4120039 | FTHL2        | 1,5 | 3E-02 | Homo sapiens ferritin, heavy polypeptide-like 2 (FTHL2) on chromosome 1.                                                |
| 6180070 | FTHL11       | 1,5 | 2E-02 | Homo sapiens ferritin, heavy polypeptide-like 11 (FTHL11) on chromosome 8.                                              |
| 270408  | P4HA2        | 1,5 | 4E-02 | Homo sapiens prolyl 4-hydroxylase, alpha polypeptide II (P4HA2), transcript variant 3, mRNA.                            |
| 3290458 | FEZ1         | 1,5 | 8E-03 | Homo sapiens fasciculation and elongation protein zeta 1 (zygin I) (FEZ1), transcript variant 1, mRNA.                  |
| 450553  | AHNAK        | 1,5 | 3E-02 | Homo sapiens AHNAK nucleoprotein (AHNAK), transcript variant 1, mRNA.                                                   |
| 3450092 | PELI1        | 1,5 | 4E-02 | Homo sapiens pellino homolog 1 (Drosophila) (PELI1), mRNA.                                                              |
| 450538  | RBPJ         | 1,5 | 1E-02 | Homo sapiens recombination signal binding protein for immunoglobulin kappa J region (RBPJ), transcript variant 1, mRNA. |
| 4150189 | CTSL1        | 1,5 | 5E-02 | Homo sapiens cathepsin L1 (CTSL1), transcript variant 1, mRNA.                                                          |
| 5560338 | IVNS1ABP     | 1,5 | 5E-03 | Homo sapiens influenza virus NS1A binding protein (IVNS1ABP), mRNA.                                                     |
| 430019  | LOC391045    | 1,5 | 4E-02 | PREDICTED: Homo sapiens similar to Solute carrier family 2, facilitated glucose transporter member 3                    |
| 2650193 | SDC4         | 1,5 | 2E-03 | Homo sapiens syndecan 4 (SDC4), mRNA.                                                                                   |
| 7160609 | WDR51B       | 1,5 | 2E-03 | Homo sapiens WD repeat domain 51B (WDR51B), mRNA.                                                                       |
| 4780615 | ANXA2        | 1,5 | 4E-02 | Homo sapiens annexin A2 (ANXA2), transcript variant 1, mRNA.                                                            |
| 5690397 | LOC642590    | 1,5 | 3E-03 | PREDICTED: Homo sapiens misc_RNA (LOC642590), miscRNA.                                                                  |
| 540706  | HLF          | 1,5 | 3E-02 | Homo sapiens hepatic leukemia factor (HLF), mRNA.                                                                       |
| 1470593 | LST1         | 1,5 | 1E-04 | Homo sapiens leukocyte specific transcript 1 (LST1), transcript variant 5, mRNA.                                        |
| 1450193 | LGALS1       | 1,5 | 4E-02 | Homo sapiens lectin, galactoside-binding, soluble, 1 (LGALS1), mRNA.                                                    |
| 3990224 | TNFRSF25     | 1,5 | 1E-02 | Homo sapiens tumor necrosis factor receptor superfamily, member 25 (TNFRSF25), transcript variant 10, mRNA.             |
| 4250192 | HS.576633    | 1,5 | 9E-03 | BX447862 Homo sapiens T CELLS (JURKAT CELL LINE) Homo sapiens cDNA clone CS0DH002YG04 3-PRIME                           |
| 5490070 | TGFBR2       | 1,5 | 2E-03 | Homo sapiens transforming growth factor, beta receptor II (70/80kDa) (TGFBR2), transcript variant 1, mRNA.              |

|         |              |     |       |                                                                                                                             |
|---------|--------------|-----|-------|-----------------------------------------------------------------------------------------------------------------------------|
| 2230367 | CERK         | 1,5 | 1E-03 | Homo sapiens ceramide kinase (CERK), transcript variant 1, mRNA.                                                            |
| 4860280 | HS.37648     | 1,5 | 3E-04 | Homo sapiens cDNA FLJ31407 fis, clone NT2NE2000137                                                                          |
| 6580402 | LOC646463    | 1,5 | 1E-02 | PREDICTED: Homo sapiens similar to Ubiquitin-conjugating enzyme E2 H (Ubiquitin-protein ligase H)                           |
| 6620392 | LFNG         | 1,5 | 3E-03 | Homo sapiens LFNG O-fucosylpeptide 3-beta-N-acetylglucosaminyltransferase (LFNG), transcript variant 1, mRNA.               |
| 7570367 | GPR65        | 1,5 | 1E-02 | Homo sapiens G protein-coupled receptor 65 (GPR65), mRNA.                                                                   |
| 1070451 | ANXA5        | 1,5 | 4E-05 | Homo sapiens annexin A5 (ANXA5), mRNA.                                                                                      |
| 6020523 | PPP2R2B      | 1,5 | 8E-03 | Homo sapiens protein phosphatase 2 (formerly 2A), regulatory subunit B, beta isoform (PPP2R2B), transcript variant 4, mRNA. |
| 5860348 | SC4MOL       | 1,5 | 8E-03 | Homo sapiens sterol-C4-methyl oxidase-like (SC4MOL), transcript variant 2, mRNA.                                            |
| 240653  | TM6SF1       | 1,5 | 2E-02 | Homo sapiens transmembrane 6 superfamily member 1 (TM6SF1), mRNA.                                                           |
| 1510364 | GBP5         | 1,5 | 3E-02 | Homo sapiens guanylate binding protein 5 (GBP5), mRNA.                                                                      |
| 670161  | CAST         | 1,5 | 1E-02 | Homo sapiens calpastatin (CAST), transcript variant 11, mRNA.                                                               |
| 3310692 | SPRY1        | 1,5 | 2E-02 | Homo sapiens sprouty homolog 1, antagonist of FGF signaling (Drosophila) (SPRY1), transcript variant 2, mRNA.               |
| 4120689 | FES          | 1,5 | 4E-02 | Homo sapiens feline sarcoma oncogene (FES), mRNA.                                                                           |
| 7210450 | LMO4         | 1,5 | 7E-03 | Homo sapiens LIM domain only 4 (LMO4), mRNA.                                                                                |
| 4280435 | LST1         | 1,5 | 9E-04 | Homo sapiens leukocyte specific transcript 1 (LST1), transcript variant 4, mRNA.                                            |
| 7610187 | ATF4         | 1,5 | 3E-03 | Homo sapiens activating transcription factor 4 (tax-responsive enhancer element B67) (ATF4), transcript variant 2, mRNA.    |
| 6560091 | TGFBR2       | 1,5 | 3E-03 | Homo sapiens transforming growth factor, beta receptor II (70/80kDa) (TGFBR2), transcript variant 1, mRNA.                  |
| 3460142 | SH2D2A       | 1,4 | 4E-03 | Homo sapiens SH2 domain protein 2A (SH2D2A), mRNA.                                                                          |
| 5270112 | HMGCS1       | 1,4 | 2E-02 | Homo sapiens 3-hydroxy-3-methylglutaryl-Coenzyme A synthase 1 (soluble) (HMGCS1), transcript variant 2, mRNA.               |
| 4150201 | BCL2         | 1,4 | 4E-02 | Homo sapiens B-cell CLL/lymphoma 2 (BCL2), nuclear gene encoding mitochondrial protein, transcript variant alpha, mRNA.     |
| 5390661 | VLDLR        | 1,4 | 2E-02 | Homo sapiens very low density lipoprotein receptor (VLDLR), transcript variant 2, mRNA.                                     |
| 2230113 | TANK         | 1,4 | 2E-03 | Homo sapiens TRAF family member-associated NFKB activator (TANK), transcript variant 1, mRNA.                               |
| 2000239 | LOC100134728 | 1,4 | 3E-02 | PREDICTED: Homo sapiens similar to LOC392621 (LOC100134728), mRNA.                                                          |
| 4900747 | C11ORF75     | 1,4 | 5E-04 | Homo sapiens chromosome 11 open reading frame 75 (C11orf75), mRNA.                                                          |
| 6450139 | FTHL3        | 1,4 | 4E-02 | Homo sapiens ferritin, heavy polypeptide-like 3 (FTHL3), non-coding RNA.                                                    |
| 1240553 | SESN1        | 1,4 | 4E-02 | Homo sapiens sestrin 1 (SESN1), mRNA.                                                                                       |
| 580706  | CCR2         | 1,4 | 2E-02 | Homo sapiens chemokine (C-C motif) receptor 2 (CCR2), transcript variant A, mRNA.                                           |
| 4040187 | C6ORF190     | 1,4 | 5E-02 | Homo sapiens chromosome 6 open reading frame 190 (C6orf190), mRNA.                                                          |
| 4150014 | CEACAM1      | 1,4 | 5E-03 | Homo sapiens carcinoembryonic antigen-related cell adhesion molecule 1 (biliary glycoprotein) (CEACAM1)                     |
| 6760546 | TIPARP       | 1,4 | 1E-02 | Homo sapiens TCDD-inducible poly(ADP-ribose) polymerase (TIPARP), mRNA.                                                     |
| 3060692 | CERK         | 1,4 | 6E-03 | Homo sapiens ceramide kinase (CERK), transcript variant 2, mRNA.                                                            |
| 2350398 | H2AFB1       | 1,4 | 5E-05 | Homo sapiens H2A histone family, member B1 (H2AFB1), mRNA.                                                                  |
| 6200692 | FOXO3        | 1,4 | 2E-02 | Homo sapiens forkhead box O3 (FOXO3), transcript variant 2, mRNA.                                                           |
| 2190452 | PIM3         | 1,4 | 3E-02 | PREDICTED: Homo sapiens pim-3 oncogene (PIM3), mRNA.                                                                        |
| 6860196 | WIPF1        | 1,4 | 4E-04 | Homo sapiens WAS/WASL interacting protein family, member 1 (WIPF1), transcript variant 2, mRNA.                             |
| 110433  | ASS1         | 1,4 | 4E-02 | Homo sapiens argininosuccinate synthetase 1 (ASS1), transcript variant 1, mRNA.                                             |
| 5690291 | LOC642590    | 1,4 | 1E-04 | PREDICTED: Homo sapiens misc_RNA (LOC642590), miscRNA.                                                                      |

|         |           |     |       |                                                                                                                       |
|---------|-----------|-----|-------|-----------------------------------------------------------------------------------------------------------------------|
| 6840475 | HS.397465 | 1,4 | 1E-03 | Homo sapiens mRNA; cDNA DKFZp686F1546 (from clone DKFZp686F1546)                                                      |
| 650241  | IER5      | 1,4 | 1E-02 | Homo sapiens immediate early response 5 (IER5), mRNA.                                                                 |
| 990735  | RNF149    | 1,4 | 2E-03 | Homo sapiens ring finger protein 149 (RNF149), mRNA.                                                                  |
| 1260523 | CYTIP     | 1,4 | 2E-03 | Homo sapiens cytohesin 1 interacting protein (CYTIP), mRNA.                                                           |
| 2030286 | JMY       | 1,4 | 5E-03 | Homo sapiens junction mediating and regulatory protein, p53 cofactor (JMY), mRNA.                                     |
| 4280228 | IVNS1ABP  | 1,4 | 5E-03 | Homo sapiens influenza virus NS1A binding protein (IVNS1ABP), mRNA.                                                   |
| 1190026 | APOBEC3G  | 1,4 | 2E-02 | Homo sapiens apolipoprotein B mRNA editing enzyme, catalytic polypeptide-like 3G (APOBEC3G), mRNA.                    |
| 1030463 | PROK2     | 1,4 | 3E-02 | Homo sapiens prokineticin 2 (PROK2), mRNA.                                                                            |
| 3940390 | TBXAS1    | 1,4 | 2E-02 | Homo sapiens thromboxane A synthase 1 (platelet, cytochrome P450, family 5, subfamily A) (TBXAS1)                     |
| 4560193 | CD44      | 1,4 | 3E-03 | Homo sapiens CD44 molecule (Indian blood group) (CD44), transcript variant 5, mRNA.                                   |
| 650112  | LST1      | 1,4 | 2E-02 | Homo sapiens leukocyte specific transcript 1 (LST1), transcript variant 1, mRNA.                                      |
| 3870706 | FURIN     | 1,4 | 2E-02 | Homo sapiens furin (paired basic amino acid cleaving enzyme) (FURIN), mRNA.                                           |
| 3130301 | PIM1      | 1,4 | 7E-03 | Homo sapiens pim-1 oncogene (PIM1), mRNA.                                                                             |
| 7400133 | CUGBP2    | 1,4 | 1E-03 | Homo sapiens CUG triplet repeat, RNA binding protein 2 (CUGBP2), transcript variant 3, mRNA.                          |
| 5360736 | HABP4     | 1,4 | 4E-03 | Homo sapiens hyaluronan binding protein 4 (HABP4), mRNA.                                                              |
| 4610180 | PIK3C2B   | 1,4 | 6E-03 | Homo sapiens phosphoinositide-3-kinase, class 2, beta polypeptide (PIK3C2B), mRNA.                                    |
| 520278  | FAM100B   | 1,4 | 2E-02 | Homo sapiens family with sequence similarity 100, member B (FAM100B), mRNA.                                           |
| 940041  | TWSG1     | 1,4 | 1E-03 | Homo sapiens twisted gastrulation homolog 1 (Drosophila) (TWSG1), mRNA.                                               |
| 3360112 | TMEM2     | 1,4 | 2E-03 | Homo sapiens transmembrane protein 2 (TMEM2), mRNA.                                                                   |
| 2000646 | B4GALT4   | 1,4 | 7E-03 | Homo sapiens UDP-Gal:betaGlcNAc beta 1,4- galactosyltransferase, polypeptide 4 (B4GALT4), transcript variant 2, mRNA. |
| 1410181 | SAMSN1    | 1,4 | 2E-02 | Homo sapiens SAM domain, SH3 domain and nuclear localization signals 1 (SAMSN1), mRNA.                                |
| 4040754 | PERP      | 1,4 | 8E-04 | Homo sapiens PERP, TP53 apoptosis effector (PERP), mRNA.                                                              |
| 6250100 | CSNK1E    | 1,4 | 5E-03 | Homo sapiens casein kinase 1, epsilon (CSNK1E), transcript variant 1, mRNA.                                           |
| 3800465 | FAM174B   | 1,4 | 2E-02 | Homo sapiens family with sequence similarity 174, member B (FAM174B), mRNA.                                           |
| 4640446 | FHL1      | 1,4 | 3E-03 | Homo sapiens four and a half LIM domains 1 (FHL1), mRNA.                                                              |
| 5080021 | BIRC3     | 1,4 | 5E-02 | Homo sapiens baculoviral IAP repeat-containing 3 (BIRC3), transcript variant 1, mRNA.                                 |
| 270338  | TRAT1     | 1,4 | 1E-02 | Homo sapiens T cell receptor associated transmembrane adaptor 1 (TRAT1), mRNA.                                        |
| 1260193 | RAB11FIP5 | 1,4 | 3E-02 | Homo sapiens RAB11 family interacting protein 5 (class I) (RAB11FIP5), mRNA.                                          |
| 6110291 | RDX       | 1,4 | 2E-02 | Homo sapiens radixin (RDX), mRNA.                                                                                     |
| 1110373 | C15ORF48  | 1,4 | 4E-02 | Homo sapiens chromosome 15 open reading frame 48 (C15orf48), transcript variant 2, mRNA.                              |
| 2060047 | B4GALT5   | 1,4 | 8E-03 | Homo sapiens UDP-Gal:betaGlcNAc beta 1,4- galactosyltransferase, polypeptide 5 (B4GALT5), mRNA.                       |
| 3940703 | RORA      | 1,4 | 5E-03 | Homo sapiens RAR-related orphan receptor A (RORA), transcript variant 3, mRNA.                                        |
| 3800202 | LOC390530 | 1,4 | 3E-02 | PREDICTED: Homo sapiens similar to Ig heavy chain V-I region HG3 precursor (LOC390530), mRNA.                         |
| 3400598 | WIPI1     | 1,4 | 2E-02 | Homo sapiens WD repeat domain, phosphoinositide interacting 1 (WIPI1), mRNA.                                          |
| 4760056 | ELOVL4    | 1,4 | 2E-04 | Homo sapiens elongation of very long chain fatty acids (FEN1/Elo2, SUR4/Elo3, yeast)-like 4 (ELOVL4), mRNA.           |
| 1090292 | BMI1      | 1,4 | 5E-03 | Homo sapiens BMI1 polycomb ring finger oncogene (BMI1), mRNA.                                                         |
| 1850437 | UBR5      | 1,4 | 3E-02 | Homo sapiens ubiquitin protein ligase E3 component n-recognin 5 (UBR5), mRNA.                                         |



|         |           |     |       |                                                                                                                          |
|---------|-----------|-----|-------|--------------------------------------------------------------------------------------------------------------------------|
| 3180494 | BCL2      | 1,4 | 5E-02 | Homo sapiens B-cell CLL/lymphoma 2 (BCL2), nuclear gene encoding mitochondrial protein, transcript variant alpha, mRNA.  |
| 3130358 | HS.25892  | 1,4 | 2E-02 | Homo sapiens cDNA FLJ38860 fis, clone MESAN2011977                                                                       |
| 1240593 | CFLAR     | 1,4 | 5E-02 | Homo sapiens CASP8 and FADD-like apoptosis regulator (CFLAR), mRNA.                                                      |
| 6900630 | ATP2B4    | 1,4 | 6E-03 | Homo sapiens ATPase, Ca <sup>++</sup> transporting, plasma membrane 4 (ATP2B4), transcript variant 2, mRNA.              |
| 4150639 | RBMS1     | 1,4 | 2E-03 | Homo sapiens RNA binding motif, single stranded interacting protein 1 (RBMS1), transcript variant 3, mRNA.               |
| 2490195 | S100A10   | 1,4 | 3E-02 | Homo sapiens S100 calcium binding protein A10 (annexin II ligand, calpactin I, light polypeptide (p11)) (S100A10), mRNA. |
| 7510719 | TRAF3IP2  | 1,4 | 4E-02 | Homo sapiens TRAF3 interacting protein 2 (TRAF3IP2), transcript variant 2, mRNA.                                         |
| 2640255 | LOC641848 | 1,4 | 9E-03 | PREDICTED: Homo sapiens similar to ribosomal protein S3a (LOC641848), mRNA.                                              |
| 7550500 | JUNB      | 1,4 | 5E-02 | Homo sapiens jun B proto-oncogene (JUNB), mRNA.                                                                          |
| 290468  | EIF2C2    | 1,4 | 4E-02 | Homo sapiens eukaryotic translation initiation factor 2C, 2 (EIF2C2), mRNA.                                              |
| 4860068 | STX1A     | 1,4 | 4E-02 | Homo sapiens syntaxin 1A (brain) (STX1A), mRNA.                                                                          |
| 4920053 | BTG3      | 1,4 | 1E-02 | Homo sapiens BTG family, member 3 (BTG3), mRNA.                                                                          |
| 2750685 | LOC392437 | 1,4 | 3E-02 | PREDICTED: Homo sapiens misc_RNA (LOC392437), miscRNA.                                                                   |
| 3890193 | CLIC4     | 1,4 | 2E-02 | Homo sapiens chloride intracellular channel 4 (CLIC4), nuclear gene encoding mitochondrial protein, mRNA.                |
| 6220593 | MGAT4A    | 1,4 | 4E-03 | Homo sapiens mannosyl (alpha-1,3-)-glycoprotein beta-1,4-N-acetylglucosaminyltransferase, isozyme A (MGAT4A)             |
| 1980044 | ZFC3H1    | 1,4 | 1E-02 | Homo sapiens zinc finger, C3H1-type containing (ZFC3H1), mRNA.                                                           |
| 4120369 | APOBEC3G  | 1,4 | 3E-02 | Homo sapiens apolipoprotein B mRNA editing enzyme, catalytic polypeptide-like 3G (APOBEC3G), mRNA.                       |
| 2680670 | HS.415576 | 1,4 | 8E-04 | Homo sapiens cDNA FLJ25252 fis, clone STM03814                                                                           |
| 4590370 | SLC2A1    | 1,4 | 1E-02 | Homo sapiens solute carrier family 2 (facilitated glucose transporter), member 1 (SLC2A1), mRNA.                         |
| 5870482 | KDM5B     | 1,4 | 1E-02 | Homo sapiens lysine (K)-specific demethylase 5B (KDM5B), mRNA.                                                           |
| 2490537 | TNFRSF1B  | 1,4 | 2E-03 | Homo sapiens tumor necrosis factor receptor superfamily, member 1B (TNFRSF1B), mRNA.                                     |
| 5290136 | LOC283953 | 1,4 | 3E-02 | PREDICTED: Homo sapiens hypothetical LOC283953 (LOC283953), mRNA.                                                        |
| 2060291 | STOM      | 1,4 | 5E-02 | Homo sapiens stomatin (STOM), transcript variant 1, mRNA.                                                                |
| 2640377 | PGCP      | 1,4 | 8E-03 | Homo sapiens plasma glutamate carboxypeptidase (PGCP), mRNA.                                                             |
| 4570398 | F2R       | 1,4 | 2E-02 | Homo sapiens coagulation factor II (thrombin) receptor (F2R), mRNA.                                                      |
| 730528  | PLAUR     | 1,4 | 3E-02 | Homo sapiens plasminogen activator, urokinase receptor (PLAUR), transcript variant 1, mRNA.                              |
| 6100482 | ATP2B4    | 1,4 | 2E-02 | Homo sapiens ATPase, Ca <sup>++</sup> transporting, plasma membrane 4 (ATP2B4), transcript variant 1, mRNA.              |
| 940673  | PACAP     | 1,4 | 4E-02 | Homo sapiens proapoptotic caspase adaptor protein (PACAP), mRNA.                                                         |
| 6040554 | WDR67     | 1,4 | 1E-02 | Homo sapiens WD repeat domain 67 (WDR67), mRNA.                                                                          |
| 1740136 | SLC38A2   | 1,4 | 4E-02 | Homo sapiens solute carrier family 38, member 2 (SLC38A2), mRNA.                                                         |
| 4480446 | LOC654350 | 1,4 | 2E-02 | PREDICTED: Homo sapiens similar to rat ribosomal protein L9 homologue (LOC654350), mRNA.                                 |
| 4880397 | ZBTB17    | 1,4 | 5E-02 | Homo sapiens zinc finger and BTB domain containing 17 (ZBTB17), mRNA.                                                    |
| 1770730 | SPAG9     | 1,4 | 2E-02 | Homo sapiens sperm associated antigen 9 (SPAG9), mRNA.                                                                   |
| 5960670 | ARID3B    | 1,4 | 4E-03 | Homo sapiens AT rich interactive domain 3B (BRIGHT-like) (ARID3B), mRNA.                                                 |
| 50332   | MDFIC     | 1,4 | 4E-02 | Homo sapiens MyoD family inhibitor domain containing (MDFIC), mRNA.                                                      |
| 2060037 | ZBTB43    | 1,3 | 5E-02 | Homo sapiens zinc finger and BTB domain containing 43 (ZBTB43), mRNA.                                                    |
| 7210259 | ANAPC1    | 1,3 | 1E-02 | Homo sapiens anaphase promoting complex subunit 1 (ANAPC1), mRNA.                                                        |

|         |           |     |       |                                                                                                                    |
|---------|-----------|-----|-------|--------------------------------------------------------------------------------------------------------------------|
| 7330044 | DYNLT3    | 1,3 | 2E-02 | Homo sapiens dynein, light chain, Tctex-type 3 (DYNLT3), mRNA.                                                     |
| 1470014 | LOC124220 | 1,3 | 3E-02 | Homo sapiens similar to common salivary protein 1 (LOC124220), mRNA.                                               |
| 4670059 | ZAK       | 1,3 | 3E-03 | Homo sapiens sterile alpha motif and leucine zipper containing kinase AZK (ZAK), transcript variant 2, mRNA.       |
| 7040431 | PRDM8     | 1,3 | 1E-02 | Homo sapiens PR domain containing 8 (PRDM8), transcript variant 1, mRNA.                                           |
| 4260309 | MAST4     | 1,3 | 8E-03 | Homo sapiens microtubule associated serine/threonine kinase family member 4 (MAST4), transcript variant 2, mRNA.   |
| 2940451 | RAB9A     | 1,3 | 2E-02 | Homo sapiens RAB9A, member RAS oncogene family (RAB9A), mRNA.                                                      |
| 830164  | ZFP36L1   | 1,3 | 5E-02 | Homo sapiens zinc finger protein 36, C3H type-like 1 (ZFP36L1), mRNA.                                              |
| 2680386 | PSCDBP    | 1,3 | 2E-02 | Homo sapiens pleckstrin homology, Sec7 and coiled-coil domains, binding protein (PSCDBP), mRNA.                    |
| 2640224 | VEGFA     | 1,3 | 1E-02 | Homo sapiens vascular endothelial growth factor A (VEGFA), transcript variant 2, mRNA.                             |
| 1580520 | PTPN13    | 1,3 | 1E-02 | Homo sapiens protein tyrosine phosphatase, non-receptor type 13 (APO-1/CD95 (Fas)-associated phosphatase) (PTPN13) |
| 5960465 | BUB3      | 1,3 | 5E-02 | Homo sapiens BUB3 budding uninhibited by benzimidazoles 3 homolog (yeast) (BUB3), transcript variant 1, mRNA.      |
| 6580408 | CTSW      | 1,3 | 2E-02 | Homo sapiens cathepsin W (CTSW), mRNA.                                                                             |
| 670286  | CDK6      | 1,3 | 2E-02 | Homo sapiens cyclin-dependent kinase 6 (CDK6), mRNA.                                                               |
| 6760619 | ASMTL     | 1,3 | 1E-02 | Homo sapiens acetylserotonin O-methyltransferase-like (ASMTL), mRNA.                                               |
| 7050619 | LRRFIP2   | 1,3 | 5E-02 | Homo sapiens leucine rich repeat (in FLII) interacting protein 2 (LRRFIP2), transcript variant 2, mRNA.            |
| 1440324 | PPARG     | 1,3 | 4E-03 | Homo sapiens peroxisome proliferator-activated receptor gamma (PPARG), transcript variant 1, mRNA.                 |
| 6860411 | ST7       | 1,3 | 3E-02 | Homo sapiens suppression of tumorigenicity 7 (ST7), transcript variant a, mRNA.                                    |
| 6040097 | ARAP3     | 1,3 | 3E-03 | Homo sapiens ArfGAP with RhoGAP domain, ankyrin repeat and PH domain 3 (ARAP3), mRNA.                              |
| 7200286 | HS.529631 | 1,3 | 3E-03 | Homo sapiens cDNA FLJ38251 fis, clone FCBBF3000184                                                                 |
| 4570575 | ST7       | 1,3 | 2E-02 | Homo sapiens suppression of tumorigenicity 7 (ST7), transcript variant a, mRNA.                                    |
| 7320551 | LYN       | 1,3 | 8E-03 | Homo sapiens v-yes-1 Yamaguchi sarcoma viral related oncogene homolog (LYN), mRNA.                                 |
| 4250670 | SLC43A3   | 1,3 | 3E-02 | Homo sapiens solute carrier family 43, member 3 (SLC43A3), mRNA.                                                   |
| 6400632 | RTTN      | 1,3 | 4E-02 | Homo sapiens rotatin (RTTN), mRNA.                                                                                 |
| 2060477 | AGPAT9    | 1,3 | 2E-02 | Homo sapiens 1-acylglycerol-3-phosphate O-acyltransferase 9 (AGPAT9), mRNA.                                        |
| 5080487 | GRPEL2    | 1,3 | 2E-03 | Homo sapiens GrpE-like 2, mitochondrial (E. coli) (GRPEL2), nuclear gene encoding mitochondrial protein, mRNA.     |
| 2640551 | CMPK1     | 1,3 | 2E-02 | Homo sapiens cytidine monophosphate (UMP-CMP) kinase 1, cytosolic (CMPK1), mRNA.                                   |
| 4290082 | LOC646786 | 1,3 | 4E-03 | PREDICTED: Homo sapiens similar to Afadin (AF-6 protein) (LOC646786), mRNA.                                        |
| 1570747 | LINGO4    | 1,3 | 1E-02 | Homo sapiens leucine rich repeat and Ig domain containing 4 (LINGO4), mRNA.                                        |
| 1300192 | ARL4C     | 1,3 | 5E-02 | Homo sapiens ADP-ribosylation factor-like 4C (ARL4C), mRNA.                                                        |
| 2480450 | GALM      | 1,3 | 3E-02 | Homo sapiens galactose mutarotase (aldose 1-epimerase) (GALM), mRNA.                                               |
| 6550209 | KIF2A     | 1,3 | 3E-02 | Homo sapiens kinesin heavy chain member 2A (KIF2A), mRNA.                                                          |
| 3520370 | MSI2      | 1,3 | 3E-02 | Homo sapiens musashi homolog 2 (Drosophila) (MSI2), transcript variant 1, mRNA.                                    |
| 1240228 | PAG1      | 1,3 | 3E-02 | Homo sapiens phosphoprotein associated with glycosphingolipid microdomains 1 (PAG1), mRNA.                         |
| 450382  | LOC441073 | 1,3 | 4E-02 | PREDICTED: Homo sapiens misc_RNA (LOC441073), miscRNA.                                                             |
| 4490341 | SMS       | 1,3 | 4E-03 | Homo sapiens spermine synthase (SMS), mRNA.                                                                        |
| 1980523 | PSCDBP    | 1,3 | 2E-02 | Homo sapiens pleckstrin homology, Sec7 and coiled-coil domains, binding protein (PSCDBP), mRNA.                    |
| 7510209 | LOC646347 | 1,3 | 2E-02 | PREDICTED: Homo sapiens misc_RNA (LOC646347), miscRNA.                                                             |

|         |           |      |       |                                                                                                                          |
|---------|-----------|------|-------|--------------------------------------------------------------------------------------------------------------------------|
| 2570435 | LETMD1    | 1,3  | 3E-02 | Homo sapiens LETM1 domain containing 1 (LETMD1), transcript variant 1, mRNA.                                             |
| 4220431 | EXT1      | 1,3  | 1E-03 | Homo sapiens exostoses (multiple) 1 (EXT1), mRNA.                                                                        |
| 60634   | FAM18B    | 1,3  | 4E-02 | Homo sapiens family with sequence similarity 18, member B (FAM18B), mRNA.                                                |
| 3360279 | CFH       | 1,3  | 6E-04 | Homo sapiens complement factor H (CFH), transcript variant 2, mRNA.                                                      |
| 2230097 | TNFRSF25  | 1,3  | 2E-02 | Homo sapiens tumor necrosis factor receptor superfamily, member 25 (TNFRSF25), transcript variant 12, mRNA.              |
| 3060609 | PTPN13    | 1,3  | 5E-03 | Homo sapiens protein tyrosine phosphatase, non-receptor type 13 (APO-1/CD95 (Fas)-associated phosphatase) (PTPN13)       |
| 7000059 | LOC642828 | 1,3  | 4E-02 | PREDICTED: Homo sapiens misc_RNA (LOC642828), miscRNA.                                                                   |
| 4280113 | NFKBIA    | 1,3  | 1E-02 | Homo sapiens nuclear factor of kappa light polypeptide gene enhancer in B-cells inhibitor, alpha (NFKBIA), mRNA.         |
| 610379  | APOBEC3F  | 1,3  | 4E-02 | Homo sapiens apolipoprotein B mRNA editing enzyme, catalytic polypeptide-like 3F (APOBEC3F), transcript variant 2, mRNA. |
| 4200196 | TNFAIP8   | 1,3  | 2E-02 | Homo sapiens tumor necrosis factor, alpha-induced protein 8 (TNFAIP8), transcript variant 2, mRNA.                       |
| 2710341 | PRNP      | 1,3  | 3E-02 | Homo sapiens prion protein (PRNP), transcript variant 2, mRNA.                                                           |
| 5290270 | S100A4    | 1,3  | 5E-02 | Homo sapiens S100 calcium binding protein A4 (S100A4), transcript variant 2, mRNA.                                       |
| 2810315 | S100A6    | 1,3  | 3E-02 | Homo sapiens S100 calcium binding protein A6 (S100A6), mRNA.                                                             |
| 2630546 | FOXO3     | 1,3  | 3E-02 | Homo sapiens forkhead box O3 (FOXO3), transcript variant 2, mRNA.                                                        |
| 540156  | PVRL3     | 1,3  | 1E-02 | Homo sapiens poliovirus receptor-related 3 (PVRL3), mRNA.                                                                |
| 2030767 | CD48      | 1,3  | 2E-02 | Homo sapiens CD48 molecule (CD48), mRNA.                                                                                 |
| 1780273 | ALOX5     | 1,3  | 2E-02 | PREDICTED: Homo sapiens arachidonate 5-lipoxygenase (ALOX5), mRNA.                                                       |
| 3990368 | PPP1CA    | -1,3 | 3E-02 | Homo sapiens protein phosphatase 1, catalytic subunit, alpha isoform (PPP1CA), transcript variant 3, mRNA.               |
| 2710402 | ZCCHC14   | -1,3 | 2E-02 | Homo sapiens zinc finger, CCHC domain containing 14 (ZCCHC14), mRNA.                                                     |
| 3460066 | ROBLD3    | -1,3 | 6E-03 | Homo sapiens roadblock domain containing 3 (ROBLD3), mRNA.                                                               |
| 4590064 | CDK2      | -1,3 | 3E-03 | Homo sapiens cyclin-dependent kinase 2 (CDK2), transcript variant 1, mRNA.                                               |
| 2320189 | PTP4A2    | -1,3 | 2E-02 | Homo sapiens protein tyrosine phosphatase type IVA, member 2 (PTP4A2), transcript variant 2, mRNA.                       |
| 1470753 | PIK3R1    | -1,3 | 4E-02 | Homo sapiens phosphoinositide-3-kinase, regulatory subunit 1 (alpha) (PIK3R1), transcript variant 1, mRNA.               |
| 1570725 | APOA1BP   | -1,3 | 4E-02 | Homo sapiens apolipoprotein A-I binding protein (APOA1BP), mRNA.                                                         |
| 6660112 | HS.564504 | -1,3 | 1E-02 | BX096603 Soares_testis_NHT Homo sapiens cDNA clone IMAGp998H151782, mRNA sequence                                        |
| 6200064 | CECR1     | -1,3 | 3E-02 | Homo sapiens cat eye syndrome chromosome region, candidate 1 (CECR1), transcript variant 2, mRNA.                        |
| 2070170 | UBE2L6    | -1,3 | 1E-02 | Homo sapiens ubiquitin-conjugating enzyme E2L 6 (UBE2L6), transcript variant 1, mRNA.                                    |
| 3130291 | C12ORF57  | -1,3 | 3E-02 | Homo sapiens chromosome 12 open reading frame 57 (C12orf57), mRNA.                                                       |
| 1740504 | MCRS1     | -1,3 | 4E-02 | Homo sapiens microspherule protein 1 (MCRS1), transcript variant 1, mRNA.                                                |
| 1230470 | RHOU      | -1,3 | 2E-02 | Homo sapiens ras homolog gene family, member U (RHOU), mRNA.                                                             |
| 1580719 | THADA     | -1,3 | 2E-02 | Homo sapiens thyroid adenoma associated (THADA), transcript variant 1, mRNA.                                             |
| 6560468 | INTS9     | -1,3 | 2E-02 | Homo sapiens integrator complex subunit 9 (INTS9), mRNA.                                                                 |
| 2760242 | TIAM1     | -1,3 | 4E-02 | Homo sapiens T-cell lymphoma invasion and metastasis 1 (TIAM1), mRNA.                                                    |
| 6770343 | ETFB      | -1,3 | 1E-02 | Homo sapiens electron-transfer-flavoprotein, beta polypeptide (ETFB), transcript variant 2, mRNA.                        |
| 6660626 | BRD3      | -1,3 | 2E-02 | Homo sapiens bromodomain containing 3 (BRD3), mRNA.                                                                      |
| 4050411 | CABLES1   | -1,3 | 4E-02 | Homo sapiens Cdk5 and Abl enzyme substrate 1 (CABLES1), transcript variant 1, mRNA.                                      |
| 6400630 | NAGPA     | -1,3 | 5E-02 | Homo sapiens N-acetylglucosamine-1-phosphodiester alpha-N-acetylglucosaminidase (NAGPA), mRNA.                           |

|         |          |      |       |                                                                                                                   |
|---------|----------|------|-------|-------------------------------------------------------------------------------------------------------------------|
| 1850546 | FAM102A  | -1,3 | 1E-02 | Homo sapiens family with sequence similarity 102, member A (FAM102A), transcript variant 1, mRNA.                 |
| 6110025 | FHL2     | -1,3 | 2E-02 | Homo sapiens four and a half LIM domains 2 (FHL2), transcript variant 4, mRNA.                                    |
| 4250048 | CMTM7    | -1,3 | 1E-02 | Homo sapiens CKLF-like MARVEL transmembrane domain containing 7 (CMTM7), transcript variant 1, mRNA.              |
| 6400619 | BCL9     | -1,3 | 1E-02 | Homo sapiens B-cell CLL/lymphoma 9 (BCL9), mRNA.                                                                  |
| 7330180 | AUH      | -1,3 | 4E-03 | Homo sapiens AU RNA binding protein/enoyl-Coenzyme A hydratase (AUH), nuclear gene encoding mitochondrial protein |
| 5260035 | LGALS14  | -1,3 | 3E-02 | Homo sapiens lectin, galactoside-binding, soluble, 14 (LGALS14), transcript variant 1, mRNA.                      |
| 730156  | ICAM2    | -1,3 | 3E-02 | Homo sapiens intercellular adhesion molecule 2 (ICAM2), transcript variant 1, mRNA.                               |
| 150692  | SLC26A6  | -1,3 | 1E-02 | Homo sapiens solute carrier family 26, member 6 (SLC26A6), transcript variant 3, mRNA.                            |
| 20491   | UBE2F    | -1,3 | 1E-02 | Homo sapiens ubiquitin-conjugating enzyme E2F (putative) (UBE2F), mRNA.                                           |
| 4060041 | MYST1    | -1,3 | 2E-02 | Homo sapiens MYST histone acetyltransferase 1 (MYST1), transcript variant 1, mRNA.                                |
| 5670154 | FBLN7    | -1,3 | 1E-02 | Homo sapiens fibulin 7 (FBLN7), mRNA.                                                                             |
| 4480504 | ZNF828   | -1,3 | 2E-02 | Homo sapiens zinc finger protein 828 (ZNF828), mRNA.                                                              |
| 3190288 | LYL1     | -1,3 | 1E-02 | Homo sapiens lymphoblastic leukemia derived sequence 1 (LYL1), mRNA.                                              |
| 2640341 | FKBP5    | -1,3 | 3E-02 | Homo sapiens FK506 binding protein 5 (FKBP5), mRNA.                                                               |
| 990288  | FHL2     | -1,3 | 1E-02 | Homo sapiens four and a half LIM domains 2 (FHL2), transcript variant 2, mRNA.                                    |
| 5340561 | ACAD9    | -1,3 | 4E-02 | Homo sapiens acyl-Coenzyme A dehydrogenase family, member 9 (ACAD9), mRNA.                                        |
| 4260139 | AKR1B1   | -1,3 | 4E-02 | Homo sapiens aldo-keto reductase family 1, member B1 (aldose reductase) (AKR1B1), mRNA.                           |
| 6560672 | HNRPR    | -1,3 | 2E-02 | Homo sapiens heterogeneous nuclear ribonucleoprotein R (HNRPR), mRNA.                                             |
| 1470427 | ALDH4A1  | -1,3 | 2E-02 | Homo sapiens aldehyde dehydrogenase 4 family, member A1 (ALDH4A1), nuclear gene encoding mitochondrial protein    |
| 5960253 | TRMT5    | -1,3 | 4E-02 | Homo sapiens TRM5 tRNA methyltransferase 5 homolog (S. cerevisiae) (TRMT5), mRNA.                                 |
| 3390328 | GPC2     | -1,3 | 3E-03 | Homo sapiens glypican 2 (GPC2), mRNA.                                                                             |
| 1740487 | BPHL     | -1,3 | 7E-03 | Homo sapiens biphenyl hydrolase-like (serine hydrolase) (BPHL), mRNA.                                             |
| 4920561 | MB       | -1,3 | 5E-02 | Homo sapiens myoglobin (MB), transcript variant 1, mRNA.                                                          |
| 2450762 | IKBKE    | -1,3 | 3E-03 | Homo sapiens inhibitor of kappa light polypeptide gene enhancer in B-cells, kinase epsilon (IKBKE), mRNA.         |
| 5690576 | TBCB     | -1,3 | 3E-02 | Homo sapiens tubulin folding cofactor B (TBCB), mRNA.                                                             |
| 4540064 | C17ORF70 | -1,3 | 5E-02 | Homo sapiens chromosome 17 open reading frame 70 (C17orf70), mRNA.                                                |
| 870497  | CCNE1    | -1,3 | 2E-02 | Homo sapiens cyclin E1 (CCNE1), transcript variant 2, mRNA.                                                       |
| 4780224 | STMN3    | -1,3 | 2E-02 | Homo sapiens stathmin-like 3 (STMN3), mRNA.                                                                       |
| 6840100 | C11ORF51 | -1,3 | 2E-02 | Homo sapiens chromosome 11 open reading frame 51 (C11orf51), mRNA.                                                |
| 3990026 | CCNE1    | -1,3 | 2E-02 | Homo sapiens cyclin E1 (CCNE1), transcript variant 1, mRNA.                                                       |
| 6180440 | PSMC4    | -1,3 | 3E-02 | Homo sapiens proteasome (prosome, macropain) 26S subunit, ATPase, 4 (PSMC4), transcript variant 1, mRNA.          |
| 1470598 | PARP3    | -1,3 | 4E-04 | Homo sapiens poly (ADP-ribose) polymerase family, member 3 (PARP3), transcript variant 2, mRNA.                   |
| 4260682 | NASP     | -1,3 | 3E-02 | Homo sapiens nuclear autoantigenic sperm protein (histone-binding) (NASP), transcript variant 2, mRNA.            |
| 2070131 | CCNE1    | -1,3 | 2E-02 | Homo sapiens cyclin E1 (CCNE1), transcript variant 2, mRNA.                                                       |
| 5550037 | CNN2     | -1,3 | 1E-03 | Homo sapiens calponin 2 (CNN2), transcript variant 2, mRNA.                                                       |
| 1340521 | YWHAB    | -1,3 | 4E-02 | Homo sapiens tyrosine 3-monooxygenase/tryptophan 5-monooxygenase activation protein, beta polypeptide (YWHAB)     |
| 2630563 | SLC39A14 | -1,4 | 5E-02 | Homo sapiens solute carrier family 39 (zinc transporter), member 14 (SLC39A14), mRNA.                             |

|         |           |      |       |                                                                                                                           |
|---------|-----------|------|-------|---------------------------------------------------------------------------------------------------------------------------|
| 6660161 | RNF144A   | -1,4 | 7E-03 | Homo sapiens ring finger protein 144A (RNF144A), mRNA.                                                                    |
| 130497  | LOC729486 | -1,4 | 2E-02 | PREDICTED: Homo sapiens similar to Interleukin-9 receptor precursor (IL-9R) (CD129 antigen) (LOC729486), mRNA.            |
| 3940471 | CCDC106   | -1,4 | 4E-02 | Homo sapiens coiled-coil domain containing 106 (CCDC106), mRNA.                                                           |
| 5690750 | GALT      | -1,4 | 4E-03 | Homo sapiens galactose-1-phosphate uridylyltransferase (GALT), mRNA.                                                      |
| 4890093 | BRP44L    | -1,4 | 5E-02 | Homo sapiens brain protein 44-like (BRP44L), mRNA.                                                                        |
| 6940408 | COBRA1    | -1,4 | 1E-02 | Homo sapiens cofactor of BRCA1 (COBRA1), mRNA.                                                                            |
| 4050541 | HMG2      | -1,4 | 6E-03 | Homo sapiens high-mobility group nucleosomal binding domain 2 (HMG2), mRNA.                                               |
| 1660010 | TRIM5     | -1,4 | 2E-02 | Homo sapiens tripartite motif-containing 5 (TRIM5), transcript variant alpha, mRNA.                                       |
| 1510521 | PAFAH1B3  | -1,4 | 5E-03 | Homo sapiens platelet-activating factor acetylhydrolase, isoform Ib, gamma subunit 29kDa (PAFAH1B3), mRNA.                |
| 3310392 | LOC148915 | -1,4 | 2E-02 | PREDICTED: Homo sapiens similar to Nonhistone chromosomal protein HMG-17                                                  |
| 1340491 | SP110     | -1,4 | 4E-02 | Homo sapiens SP110 nuclear body protein (SP110), transcript variant b, mRNA.                                              |
| 5360653 | CPT2      | -1,4 | 5E-03 | Homo sapiens carnitine palmitoyltransferase II (CPT2), nuclear gene encoding mitochondrial protein, mRNA.                 |
| 5360646 | PSMC4     | -1,4 | 3E-02 | Homo sapiens proteasome (prosome, macropain) 26S subunit, ATPase, 4 (PSMC4), transcript variant 1, mRNA.                  |
| 4880433 | IDH2      | -1,4 | 4E-03 | Homo sapiens isocitrate dehydrogenase 2 (NADP+), mitochondrial (IDH2), nuclear gene encoding mitochondrial protein, mRNA. |
| 5490068 | MCOLN2    | -1,4 | 3E-03 | Homo sapiens mucolipin 2 (MCOLN2), mRNA.                                                                                  |
| 5670475 | GCHFR     | -1,4 | 2E-02 | Homo sapiens GTP cyclohydrolase I feedback regulator (GCHFR), mRNA.                                                       |
| 4280300 | DIS3L     | -1,4 | 3E-02 | Homo sapiens DIS3 mitotic control homolog (S. cerevisiae)-like (DIS3L), mRNA.                                             |
| 1470632 | UROS      | -1,4 | 4E-02 | Homo sapiens uroporphyrinogen III synthase (congenital erythropoietic porphyria) (UROS), mRNA.                            |
| 1170673 | TNFSF14   | -1,4 | 1E-02 | Homo sapiens tumor necrosis factor (ligand) superfamily, member 14 (TNFSF14), transcript variant 2, mRNA.                 |
| 3170593 | PTPRA     | -1,4 | 2E-02 | Homo sapiens protein tyrosine phosphatase, receptor type, A (PTPRA), transcript variant 2, mRNA.                          |
| 5290593 | GAMT      | -1,4 | 8E-03 | Homo sapiens guanidinoacetate N-methyltransferase (GAMT), transcript variant 1, mRNA.                                     |
| 1070035 | ETFB      | -1,4 | 3E-03 | Homo sapiens electron-transfer-flavoprotein, beta polypeptide (ETFB), transcript variant 2, mRNA.                         |
| 4040711 | PSMA4     | -1,4 | 3E-02 | Homo sapiens proteasome (prosome, macropain) subunit, alpha type, 4 (PSMA4), mRNA.                                        |
| 3840215 | FAM102A   | -1,4 | 7E-03 | Homo sapiens family with sequence similarity 102, member A (FAM102A), transcript variant 1, mRNA.                         |
| 2600452 | SURF6     | -1,4 | 4E-02 | Homo sapiens surfait 6 (SURF6), mRNA.                                                                                     |
| 6220242 | ETFB      | -1,4 | 9E-04 | Homo sapiens electron-transfer-flavoprotein, beta polypeptide (ETFB), transcript variant 1, mRNA.                         |
| 940471  | C5ORF13   | -1,4 | 1E-02 | Homo sapiens chromosome 5 open reading frame 13 (C5orf13), mRNA.                                                          |
| 770592  | TNFSF14   | -1,4 | 1E-02 | Homo sapiens tumor necrosis factor (ligand) superfamily, member 14 (TNFSF14), transcript variant 1, mRNA.                 |
| 6270139 | KRBA1     | -1,4 | 9E-03 | Homo sapiens KRAB-A domain containing 1 (KRBA1), mRNA.                                                                    |
| 630315  | DHRS9     | -1,4 | 4E-02 | Homo sapiens dehydrogenase/reductase (SDR family) member 9 (DHRS9), transcript variant 1, mRNA.                           |
| 1030333 | CCL2      | -1,4 | 3E-02 | Homo sapiens chemokine (C-C motif) ligand 2 (CCL2), mRNA.                                                                 |
| 730274  | MCM7      | -1,4 | 3E-02 | Homo sapiens minichromosome maintenance complex component 7 (MCM7), transcript variant 1, mRNA.                           |
| 7000368 | UBE2L6    | -1,4 | 4E-03 | Homo sapiens ubiquitin-conjugating enzyme E2L 6 (UBE2L6), transcript variant 1, mRNA.                                     |
| 4180050 | TIMELESS  | -1,4 | 1E-02 | Homo sapiens timeless homolog (Drosophila) (TIMELESS), mRNA.                                                              |
| 1940288 | TYSND1    | -1,4 | 9E-03 | Homo sapiens trypsin domain containing 1 (TYSND1), transcript variant 2, mRNA.                                            |
| 4780129 | CENPF     | -1,4 | 4E-04 | Homo sapiens centromere protein F, 350/400ka (mitosin) (CENPF), mRNA.                                                     |
| 650369  | PSMD8     | -1,4 | 4E-02 | Homo sapiens proteasome (prosome, macropain) 26S subunit, non-ATPase, 8 (PSMD8), mRNA.                                    |

|         |           |      |       |                                                                                                                           |
|---------|-----------|------|-------|---------------------------------------------------------------------------------------------------------------------------|
| 2640441 | PRAGMIN   | -1,4 | 5E-03 | Homo sapiens homolog of rat pragma of Rnd2 (PRAGMIN), mRNA.                                                               |
| 3780619 | TMEM14A   | -1,4 | 3E-02 | Homo sapiens transmembrane protein 14A (TMEM14A), mRNA.                                                                   |
| 5960747 | TRIM22    | -1,4 | 4E-02 | Homo sapiens tripartite motif-containing 22 (TRIM22), mRNA.                                                               |
| 6040286 | PER2      | -1,4 | 1E-03 | Homo sapiens period homolog 2 (Drosophila) (PER2), mRNA.                                                                  |
| 2970703 | RNF125    | -1,4 | 3E-03 | Homo sapiens ring finger protein 125 (RNF125), mRNA.                                                                      |
| 1780402 | SEPN1     | -1,4 | 4E-03 | Homo sapiens selenoprotein N, 1 (SEPN1), transcript variant 2, mRNA.                                                      |
| 3840593 | SP110     | -1,4 | 4E-02 | Homo sapiens SP110 nuclear body protein (SP110), transcript variant b, mRNA.                                              |
| 2650156 | TAP2      | -1,4 | 4E-02 | Homo sapiens transporter 2, ATP-binding cassette, sub-family B (MDR/TAP) (TAP2), transcript variant 2, mRNA.              |
| 3890187 | PRMT6     | -1,4 | 7E-03 | Homo sapiens protein arginine methyltransferase 6 (PRMT6), mRNA.                                                          |
| 4830424 | MYLIP     | -1,4 | 3E-02 | Homo sapiens myosin regulatory light chain interacting protein (MYLIP), mRNA.                                             |
| 1190040 | GIMAP8    | -1,4 | 6E-04 | Homo sapiens GTPase, IMAP family member 8 (GIMAP8), mRNA.                                                                 |
| 430411  | TOR3A     | -1,4 | 1E-02 | Homo sapiens torsk family 3, member A (TOR3A), mRNA.                                                                      |
| 70288   | HS.150067 | -1,4 | 2E-02 | Homo sapiens cDNA FLJ43367 fis, clone NT2RP8000435                                                                        |
| 1240152 | CFD       | -1,4 | 2E-02 | Homo sapiens complement factor D (adipsin) (CFD), mRNA.                                                                   |
| 2070402 | CYSLTR1   | -1,4 | 5E-04 | Homo sapiens cysteinyl leukotriene receptor 1 (CYSLTR1), mRNA.                                                            |
| 3450136 | RNF144    | -1,4 | 5E-03 | Homo sapiens ring finger protein 144 (RNF144), mRNA.                                                                      |
| 6650746 | RHBDD2    | -1,4 | 2E-02 | Homo sapiens rhomboid domain containing 2 (RHBDD2), transcript variant 1, mRNA.                                           |
| 1820750 | STAT1     | -1,4 | 2E-02 | Homo sapiens signal transducer and activator of transcription 1, 91kDa (STAT1), transcript variant alpha, mRNA.           |
| 2480541 | TIGIT     | -1,4 | 2E-02 | Homo sapiens T cell immunoreceptor with Ig and ITIM domains (TIGIT), mRNA.                                                |
| 2850176 | C14ORF72  | -1,4 | 7E-04 | PREDICTED: Homo sapiens chromosome 14 open reading frame 72 (C14orf72), mRNA.                                             |
| 770424  | CTGLF3    | -1,4 | 8E-03 | Homo sapiens centaurin, gamma-like family, member 3 (CTGLF3), mRNA.                                                       |
| 6420168 | DBNDD2    | -1,4 | 2E-03 | Homo sapiens dysbindin (dystrobrevin binding protein 1) domain containing 2 (DBNDD2), transcript variant 3, mRNA.         |
| 2570079 | STAT1     | -1,4 | 9E-03 | Homo sapiens signal transducer and activator of transcription 1, 91kDa (STAT1), transcript variant beta, mRNA.            |
| 5260541 | CDK2AP1   | -1,5 | 2E-02 | Homo sapiens cyclin-dependent kinase 2 associated protein 1 (CDK2AP1), mRNA.                                              |
| 4220672 | MT1F      | -1,5 | 3E-02 | Homo sapiens metallothionein 1F (MT1F), mRNA.                                                                             |
| 510452  | FHIT      | -1,5 | 7E-04 | Homo sapiens fragile histidine triad gene (FHIT), mRNA.                                                                   |
| 6980593 | GAMT      | -1,5 | 4E-03 | Homo sapiens guanidinoacetate N-methyltransferase (GAMT), transcript variant 1, mRNA.                                     |
| 3830220 | UBASH3A   | -1,5 | 3E-03 | Homo sapiens ubiquitin associated and SH3 domain containing, A (UBASH3A), transcript variant 2, mRNA.                     |
| 5720128 | COQ2      | -1,5 | 2E-02 | Homo sapiens coenzyme Q2 homolog, prenyltransferase (yeast) (COQ2), mRNA.                                                 |
| 3420332 | SLC37A3   | -1,5 | 4E-03 | Homo sapiens solute carrier family 37 (glycerol-3-phosphate transporter), member 3 (SLC37A3), transcript variant 2, mRNA. |
| 3830349 | IL7R      | -1,5 | 8E-04 | Homo sapiens interleukin 7 receptor (IL7R), mRNA.                                                                         |
| 150767  | BANF1     | -1,5 | 2E-02 | Homo sapiens barrier to autointegration factor 1 (BANF1), mRNA.                                                           |
| 620092  | ATP6V0A2  | -1,5 | 2E-02 | Homo sapiens ATPase, H <sup>+</sup> transporting, lysosomal V0 subunit a2 (ATP6V0A2), mRNA.                               |
| 3840377 | IL4       | -1,5 | 3E-02 | Homo sapiens interleukin 4 (IL4), transcript variant 2, mRNA.                                                             |
| 3890523 | IL7R      | -1,5 | 2E-02 | PREDICTED: Homo sapiens interleukin 7 receptor (IL7R), mRNA.                                                              |
| 5910719 | GATA3     | -1,5 | 2E-03 | Homo sapiens GATA binding protein 3 (GATA3), transcript variant 2, mRNA.                                                  |
| 4050491 | TCEA3     | -1,5 | 4E-02 | Homo sapiens transcription elongation factor A (SII), 3 (TCEA3), mRNA.                                                    |

|         |           |      |       |                                                                                                               |
|---------|-----------|------|-------|---------------------------------------------------------------------------------------------------------------|
| 2640408 | DENND5A   | -1,5 | 7E-03 | Homo sapiens DENN/MADD domain containing 5A (DENND5A), mRNA.                                                  |
| 2850576 | SEMA4A    | -1,5 | 1E-02 | Homo sapiens sema domain, immunoglobulin domain (Ig), transmembrane domain (TM) and short cytoplasmic domain  |
| 1820543 | ZNF428    | -1,5 | 3E-02 | Homo sapiens zinc finger protein 428 (ZNF428), mRNA.                                                          |
| 4670441 | FBLN5     | -1,5 | 2E-03 | Homo sapiens fibulin 5 (FBLN5), mRNA.                                                                         |
| 6940358 | SELL      | -1,5 | 2E-02 | Homo sapiens selectin L (SELL), mRNA.                                                                         |
| 6420450 | LIME1     | -1,5 | 2E-02 | Homo sapiens Lck interacting transmembrane adaptor 1 (LIME1), mRNA.                                           |
| 6280326 | HDC       | -1,5 | 1E-02 | Homo sapiens histidine decarboxylase (HDC), mRNA.                                                             |
| 5360156 | IFITM1    | -1,5 | 2E-02 | Homo sapiens interferon induced transmembrane protein 1 (9-27) (IFITM1), mRNA.                                |
| 1440477 | GAD1      | -1,5 | 2E-03 | Homo sapiens glutamate decarboxylase 1 (brain, 67kDa) (GAD1), transcript variant GAD25, mRNA.                 |
| 2810601 | LEF1      | -1,5 | 4E-03 | Homo sapiens lymphoid enhancer-binding factor 1 (LEF1), mRNA.                                                 |
| 3190379 | TGFBR3    | -1,5 | 4E-03 | Homo sapiens transforming growth factor, beta receptor III (TGFBR3), mRNA.                                    |
| 1070189 | AXIN2     | -1,6 | 2E-04 | Homo sapiens axin 2 (conductin, axil) (AXIN2), mRNA.                                                          |
| 5080364 | ACTN1     | -1,6 | 2E-02 | Homo sapiens actinin, alpha 1 (ACTN1), mRNA.                                                                  |
| 3170091 | GIMAP7    | -1,6 | 1E-03 | Homo sapiens GTPase, IMAP family member 7 (GIMAP7), mRNA.                                                     |
| 6250435 | ARHGEF3   | -1,6 | 9E-04 | Homo sapiens Rho guanine nucleotide exchange factor (GEF) 3 (ARHGEF3), mRNA.                                  |
| 2320576 | RBM47     | -1,6 | 1E-05 | Homo sapiens RNA binding motif protein 47 (RBM47), transcript variant 2, mRNA.                                |
| 1440243 | SEPX1     | -1,6 | 2E-05 | Homo sapiens selenoprotein X, 1 (SEPX1), mRNA.                                                                |
| 4570255 | LEF1      | -1,6 | 1E-03 | Homo sapiens lymphoid enhancer-binding factor 1 (LEF1), mRNA.                                                 |
| 4220504 | SERPINB6  | -1,6 | 2E-03 | Homo sapiens serpin peptidase inhibitor, clade B (ovalbumin), member 6 (SERPINB6), mRNA.                      |
| 450253  | PTK2      | -1,6 | 1E-04 | Homo sapiens PTK2 protein tyrosine kinase 2 (PTK2), transcript variant 2, mRNA.                               |
| 610113  | TNFSF14   | -1,6 | 2E-03 | Homo sapiens tumor necrosis factor (ligand) superfamily, member 14 (TNFSF14), transcript variant 1, mRNA.     |
| 50278   | LAIR2     | -1,6 | 5E-02 | Homo sapiens leukocyte-associated immunoglobulin-like receptor 2 (LAIR2), transcript variant 1, mRNA.         |
| 2140059 | C1ORF165  | -1,6 | 7E-04 | Homo sapiens chromosome 1 open reading frame 165 (C1orf165), mRNA.                                            |
| 1230767 | IFITM2    | -1,6 | 2E-03 | Homo sapiens interferon induced transmembrane protein 2 (1-8D) (IFITM2), mRNA.                                |
| 1240730 | SPINT2    | -1,6 | 3E-02 | Homo sapiens serine peptidase inhibitor, Kunitz type, 2 (SPINT2), mRNA.                                       |
| 2570291 | IFNGR2    | -1,7 | 1E-03 | Homo sapiens interferon gamma receptor 2 (interferon gamma transducer 1) (IFNGR2), mRNA.                      |
| 6770242 | MARCKSL1  | -1,7 | 2E-05 | Homo sapiens MARCKS-like 1 (MARCKSL1), mRNA.                                                                  |
| 4070239 | ATHL1     | -1,7 | 3E-02 | Homo sapiens ATH1, acid trehalase-like 1 (yeast) (ATHL1), mRNA.                                               |
| 540747  | HS.276860 | -1,8 | 3E-05 | 601441142F1 NIH_MGC_72 Homo sapiens cDNA clone IMAGE:3915971 5, mRNA sequence                                 |
| 5290259 | KLHL22    | -1,8 | 1E-05 | Homo sapiens kelch-like 22 (Drosophila) (KLHL22), mRNA.                                                       |
| 6650242 | IFITM3    | -1,8 | 2E-03 | Homo sapiens interferon induced transmembrane protein 3 (1-8U) (IFITM3), mRNA.                                |
| 3310445 | MRPS26    | -1,8 | 2E-03 | Homo sapiens mitochondrial ribosomal protein S26 (MRPS26), nuclear gene encoding mitochondrial protein, mRNA. |
| 4880537 | LIMA1     | -1,8 | 6E-04 | Homo sapiens LIM domain and actin binding 1 (LIMA1), mRNA.                                                    |
| 4780600 | RBM47     | -1,8 | 1E-06 | Homo sapiens RNA binding motif protein 47 (RBM47), transcript variant 1, mRNA.                                |
| 150072  | IRF8      | -1,8 | 2E-02 | Homo sapiens interferon regulatory factor 8 (IRF8), mRNA.                                                     |
| 6280184 | MAN1C1    | -1,9 | 7E-07 | Homo sapiens mannosidase, alpha, class 1C, member 1 (MAN1C1), mRNA.                                           |
| 3310050 | GNRH2     | -1,9 | 4E-02 | Homo sapiens gonadotropin-releasing hormone 2 (GNRH2), transcript variant 1, mRNA.                            |

|         |          |      |       |                                                                                       |
|---------|----------|------|-------|---------------------------------------------------------------------------------------|
| 7040605 | IL5      | -2,0 | 3E-02 | Homo sapiens interleukin 5 (colony-stimulating factor, eosinophil) (IL5), mRNA.       |
| 6270553 | CXCL10   | -2,0 | 1E-03 | Homo sapiens chemokine (C-X-C motif) ligand 10 (CXCL10), mRNA.                        |
| 4540398 | BEND5    | -2,2 | 4E-04 | Homo sapiens BEN domain containing 5 (BEND5), mRNA.                                   |
| 7050719 | C1ORF162 | -2,2 | 7E-07 | Homo sapiens chromosome 1 open reading frame 162 (C1orf162), mRNA.                    |
| 2650564 | RARRES3  | -2,3 | 6E-04 | Homo sapiens retinoic acid receptor responder (tazarotene induced) 3 (RARRES3), mRNA. |
| 1070152 | IL17RB   | -2,3 | 1E-03 | Homo sapiens interleukin 17 receptor B (IL17RB), mRNA.                                |
| 4880678 | GNRH2    | -2,5 | 2E-02 | Homo sapiens gonadotropin-releasing hormone 2 (GNRH2), transcript variant 2, mRNA.    |
| 1430634 | MGC33556 | -2,5 | 2E-05 | Homo sapiens hypothetical LOC339541 (MGC33556), mRNA.                                 |
| 2030142 | CLC      | -2,6 | 3E-05 | Homo sapiens Charcot-Leyden crystal protein (CLC), mRNA.                              |
| 4010040 | HBG2     | -2,7 | 3E-02 | Homo sapiens hemoglobin, gamma G (HBG2), mRNA.                                        |
| 7400113 | HBG1     | -2,7 | 4E-02 | Homo sapiens hemoglobin, gamma A (HBG1), mRNA.                                        |
| 3440739 | HBB      | -2,8 | 3E-02 | Homo sapiens hemoglobin, beta (HBB), mRNA.                                            |
| 1450358 | HBD      | -3,5 | 6E-03 | Homo sapiens hemoglobin, delta (HBD), mRNA.                                           |
| 4180600 | IL9      | -3,9 | 4E-04 | Homo sapiens interleukin 9 (IL9), mRNA.                                               |
| 2120167 | IL9      | -4,0 | 4E-04 | Homo sapiens interleukin 9 (IL9), mRNA.                                               |



| <b>Supplemental Table 2: Transcripts modulated by ATRA in CCR6+ T-cells</b> |               |                    |                  |                                                                                                          |
|-----------------------------------------------------------------------------|---------------|--------------------|------------------|----------------------------------------------------------------------------------------------------------|
| <b>ProbeID</b>                                                              | <b>SYMBOL</b> | <b>Fold Change</b> | <b>adj.P.Val</b> | <b>Definition</b>                                                                                        |
| 2650564                                                                     | RARRES3       | 5.40               | 2,2E-08          | Homo sapiens retinoic acid receptor responder (tazarotene induced) 3 (RARRES3), mRNA.                    |
| 2760500                                                                     | CD38          | 5.09               | 5,1E-14          | Homo sapiens CD38 molecule (CD38), mRNA.                                                                 |
| 7040670                                                                     | DHRS3         | 2.55               | 2,9E-05          | Homo sapiens dehydrogenase/reductase (SDR family) member 3 (DHRS3), mRNA.                                |
| 6420605                                                                     | UBD           | 2.47               | 4,6E-04          | Homo sapiens ubiquitin D (UBD), mRNA.                                                                    |
| 4560129                                                                     | LGMN          | 2.32               | 1,6E-04          | Homo sapiens legumain (LGMN), transcript variant 2, mRNA.                                                |
| 4540176                                                                     | EVI5          | 2.20               | 2,5E-06          | Homo sapiens ecotropic viral integration site 5 (EVI5), mRNA.                                            |
| 6250154                                                                     | LZTFL1        | 2.10               | 1,6E-07          | Homo sapiens leucine zipper transcription factor-like 1 (LZTFL1), mRNA.                                  |
| 2100296                                                                     | NAPSA         | 2.06               | 2,5E-04          | Homo sapiens napsin A aspartic peptidase (NAPSA), mRNA.                                                  |
| 1980524                                                                     | GBP4          | 2.05               | 1,8E-05          | Homo sapiens guanylate binding protein 4 (GBP4), mRNA.                                                   |
| 20477                                                                       | HIC1          | 1.98               | 2,2E-08          | Homo sapiens hypermethylated in cancer 1 (HIC1), transcript variant 2, mRNA.                             |
| 2510593                                                                     | HRASLS3       | 1.96               | 5,1E-05          | Homo sapiens HRAS-like suppressor 3 (HRASLS3), mRNA.                                                     |
| 5900471                                                                     | PTGER2        | 1.92               | 3,8E-06          | Homo sapiens prostaglandin E receptor 2 (subtype EP2), 53kDa (PTGER2), mRNA.                             |
| 5220661                                                                     | CCR9          | 1.89               | 3,8E-06          | Homo sapiens chemokine (C-C motif) receptor 9 (CCR9), transcript variant A, mRNA.                        |
| 4120379                                                                     | GFI1          | 1.88               | 2,5E-04          | Homo sapiens growth factor independent 1 transcription repressor (GFI1), mRNA.                           |
| 6480630                                                                     | ATP9A         | 1.84               | 2,8E-03          | Homo sapiens ATPase, class II, type 9A (ATP9A), mRNA.                                                    |
| 4810520                                                                     | TRIB1         | 1.84               | 3,0E-04          | Homo sapiens tribbles homolog 1 (Drosophila) (TRIB1), mRNA.                                              |
| 1300452                                                                     | LGMN          | 1.81               | 2,6E-03          | Homo sapiens legumain (LGMN), transcript variant 2, mRNA.                                                |
| 6040711                                                                     | CCR2          | 1.80               | 2,1E-04          | Homo sapiens chemokine (C-C motif) receptor 2 (CCR2), transcript variant A, mRNA.                        |
| 5900358                                                                     | SLC26A4       | 1.78               | 1,8E-03          | Homo sapiens solute carrier family 26, member 4 (SLC26A4), mRNA.                                         |
| 5360484                                                                     | CCR9          | 1.78               | 2,3E-04          | Homo sapiens chemokine (C-C motif) receptor 9 (CCR9), transcript variant A, mRNA.                        |
| 2680050                                                                     | SIRPG         | 1.77               | 2,4E-03          | Homo sapiens signal-regulatory protein gamma (SIRPG), transcript variant 2, mRNA.                        |
| 580706                                                                      | CCR2          | 1.75               | 6,7E-04          | Homo sapiens chemokine (C-C motif) receptor 2 (CCR2), transcript variant A, mRNA.                        |
| 2900427                                                                     | P2RX5         | 1.72               | 8,5E-04          | Homo sapiens purinergic receptor P2X, ligand-gated ion channel, 5 (P2RX5), transcript variant 2, mRNA.   |
| 3170068                                                                     | APOBEC3B      | 1.71               | 2,3E-03          | Homo sapiens apolipoprotein B mRNA editing enzyme, catalytic polypeptide-like 3B (APOBEC3B), mRNA.       |
| 3290025                                                                     | LOC730074     | 1.71               | 2,9E-05          | PREDICTED: Homo sapiens hypothetical LOC730074 (LOC730074), mRNA.                                        |
| 830735                                                                      | CENTA1        | 1.71               | 4,6E-04          | Homo sapiens centaurin, alpha 1 (CENTA1), mRNA.                                                          |
| 3940041                                                                     | SIRPG         | 1.71               | 4,7E-03          | Homo sapiens signal-regulatory protein gamma (SIRPG), transcript variant 3, mRNA.                        |
| 940148                                                                      | ABTB2         | 1.69               | 4,4E-05          | Homo sapiens ankyrin repeat and BTB (POZ) domain containing 2 (ABTB2), mRNA.                             |
| 6550333                                                                     | CXCR6         | 1.69               | 2,5E-02          | Homo sapiens chemokine (C-X-C motif) receptor 6 (CXCR6), mRNA.                                           |
| 3440674                                                                     | ASB2          | 1.68               | 7,1E-04          | Homo sapiens ankyrin repeat and SOCS box-containing 2 (ASB2), mRNA.                                      |
| 4050671                                                                     | GNG4          | 1.66               | 2,8E-02          | Homo sapiens guanine nucleotide binding protein (G protein), gamma 4 (GNG4), transcript variant 2, mRNA. |
| 5900725                                                                     | PHLDA1        | 1.63               | 9,8E-03          | Homo sapiens pleckstrin homology-like domain, family A, member 1 (PHLDA1), mRNA.                         |
| 6520241                                                                     | FAM116B       | 1.57               | 2,2E-02          | Homo sapiens family with sequence similarity 116, member B (FAM116B), mRNA.                              |
| 5900452                                                                     | CHST7         | 1.56               | 6,0E-04          | Homo sapiens carbohydrate (N-acetylglucosamine 6-O) sulfotransferase 7 (CHST7), mRNA.                    |
| 2190121                                                                     | GGA2          | 1.54               | 1,7E-03          | Homo sapiens golgi associated, gamma adaptin ear containing, ARF binding protein 2 (GGA2), mRNA.         |

|         |              |      |         |                                                                                                            |
|---------|--------------|------|---------|------------------------------------------------------------------------------------------------------------|
| 5290465 | CASP7        | 1,52 | 8,2E-05 | Homo sapiens caspase 7, apoptosis-related cysteine peptidase (CASP7), transcript variant gamma, mRNA.      |
| 1240142 | SAMD9        | 1,52 | 1,9E-02 | Homo sapiens sterile alpha motif domain containing 9 (SAMD9), mRNA.                                        |
| 4560047 | CD74         | 1,50 | 3,2E-02 | Homo sapiens CD74 molecule, major histocompatibility complex, class II invariant chain (CD74)              |
| 4570398 | F2R          | 1,49 | 2,8E-03 | Homo sapiens coagulation factor II (thrombin) receptor (F2R), mRNA.                                        |
| 3370037 | HS.561747    | 1,49 | 4,7E-03 | AGENCOURT_10520654 NIH_MGC_128 Homo sapiens cDNA clone IMAGE:6702588 5, mRNA sequence                      |
| 4070524 | CERKL        | 1,48 | 5,3E-04 | Homo sapiens ceramide kinase-like (CERKL), transcript variant 1, mRNA.                                     |
| 1510646 | TKTL1        | 1,48 | 2,2E-02 | Homo sapiens transketolase-like 1 (TKTL1), mRNA.                                                           |
| 2000669 | ARHGAP10     | 1,47 | 1,8E-03 | Homo sapiens Rho GTPase activating protein 10 (ARHGAP10), mRNA.                                            |
| 7160563 | SMG6         | 1,46 | 4,2E-04 | Homo sapiens Smg-6 homolog, nonsense mediated mRNA decay factor ( <i>C. elegans</i> ) (SMG6), mRNA.        |
| 3990379 | ITGB7        | 1,46 | 2,8E-02 | Homo sapiens integrin, beta 7 (ITGB7), mRNA.                                                               |
| 7330538 | PYHIN1       | 1,46 | 1,5E-02 | Homo sapiens pyrin and HIN domain family, member 1 (PYHIN1), transcript variant a1, mRNA.                  |
| 780022  | LOC100132299 | 1,45 | 2,0E-03 | PREDICTED: Homo sapiens similar to MSTP075 (LOC100132299), mRNA.                                           |
| 7320731 | MAP3K4       | 1,44 | 4,9E-02 | Homo sapiens mitogen-activated protein kinase kinase kinase 4 (MAP3K4), transcript variant 1, mRNA.        |
| 7210647 | NKD2         | 1,44 | 4,9E-02 | Homo sapiens naked cuticle homolog 2 ( <i>Drosophila</i> ) (NKD2), mRNA.                                   |
| 5260403 | ST3GAL5      | 1,44 | 4,8E-03 | Homo sapiens ST3 beta-galactoside alpha-2,3-sialyltransferase 5 (ST3GAL5), transcript variant 2, mRNA.     |
| 7200274 | DGCR6        | 1,44 | 3,8E-03 | Homo sapiens DiGeorge syndrome critical region gene 6 (DGCR6), mRNA.                                       |
| 7650440 | BACH2        | 1,42 | 6,2E-03 | Homo sapiens BTB and CNC homology 1, basic leucine zipper transcription factor 2 (BACH2), mRNA.            |
| 4880193 | KLRG1        | 1,42 | 1,7E-02 | Homo sapiens killer cell lectin-like receptor subfamily G, member 1 (KLRG1), mRNA.                         |
| 130364  | C5ORF62      | 1,42 | 1,3E-04 | Homo sapiens chromosome 5 open reading frame 62 (C5orf62), mRNA.                                           |
| 1070544 | EFHD2        | 1,42 | 8,5E-03 | Homo sapiens EF-hand domain family, member D2 (EFHD2), mRNA.                                               |
| 1010364 | DGCR6        | 1,41 | 9,8E-03 | Homo sapiens DiGeorge syndrome critical region gene 6 (DGCR6), mRNA.                                       |
| 940669  | TRPT1        | 1,40 | 6,1E-03 | Homo sapiens tRNA phosphotransferase 1 (TRPT1), transcript variant 2, mRNA.                                |
| 3120671 | RPA1         | 1,40 | 3,8E-03 | Homo sapiens replication protein A1, 70kDa (RPA1), mRNA.                                                   |
| 1570538 | GTF2E2       | 1,40 | 1,5E-04 | Homo sapiens general transcription factor IIE, polypeptide 2, beta 34kDa (GTF2E2), mRNA.                   |
| 6660368 | MAP4K1       | 1,39 | 7,4E-03 | Homo sapiens mitogen-activated protein kinase kinase kinase kinase 1 (MAP4K1), transcript variant 1, mRNA. |
| 5220767 | FLNB         | 1,39 | 2,5E-02 | Homo sapiens filamin B, beta (actin binding protein 278) (FLNB), mRNA.                                     |
| 4120671 | SSBP3        | 1,39 | 1,3E-02 | Homo sapiens single stranded DNA binding protein 3 (SSBP3), transcript variant 2, mRNA.                    |
| 3140022 | ZSCAN2       | 1,39 | 2,3E-03 | Homo sapiens zinc finger and SCAN domain containing 2 (ZSCAN2), transcript variant 1, mRNA.                |
| 2450494 | BTLA         | 1,38 | 1,7E-02 | Homo sapiens B and T lymphocyte associated (BTLA), transcript variant 1, mRNA.                             |
| 1030026 | CENPV        | 1,38 | 1,7E-02 | Homo sapiens centromere protein V (CENPV), mRNA.                                                           |
| 4250048 | CMTM7        | 1,38 | 6,2E-03 | Homo sapiens CKLF-like MARVEL transmembrane domain containing 7 (CMTM7), transcript variant 1, mRNA.       |
| 4590477 | MAP4K1       | 1,37 | 9,1E-03 | Homo sapiens mitogen-activated protein kinase kinase kinase kinase 1 (MAP4K1), transcript variant 1, mRNA. |
| 2970730 | MYADM        | 1,37 | 1,6E-03 | Homo sapiens myeloid-associated differentiation marker (MYADM), transcript variant 4, mRNA.                |
| 6520433 | ZNF789       | 1,37 | 3,5E-03 | Homo sapiens zinc finger protein 789 (ZNF789), transcript variant 2, mRNA.                                 |
| 6250064 | IRF1         | 1,37 | 1,9E-03 | Homo sapiens interferon regulatory factor 1 (IRF1), mRNA.                                                  |
| 5960239 | CCR2         | 1,37 | 8,5E-03 | Homo sapiens chemokine (C-C motif) receptor 2 (CCR2), transcript variant B, mRNA.                          |
| 4860224 | WARS         | 1,37 | 3,8E-02 | Homo sapiens tryptophanyl-tRNA synthetase (WARS), transcript variant 1, mRNA.                              |

|         |           |  |       |         |                                                                                                                   |
|---------|-----------|--|-------|---------|-------------------------------------------------------------------------------------------------------------------|
| 7320370 | STAT4     |  | 1,37  | 1,4E-02 | Homo sapiens signal transducer and activator of transcription 4 (STAT4), mRNA.                                    |
| 5270072 | CYP26A1   |  | 1,37  | 3,0E-02 | Homo sapiens cytochrome P450, family 26, subfamily A, polypeptide 1 (CYP26A1), transcript variant 2, mRNA.        |
| 4670327 | FBXO7     |  | 1,37  | 1,6E-02 | Homo sapiens F-box protein 7 (FBXO7), transcript variant 2, mRNA.                                                 |
| 3930326 | LOC728014 |  | 1,36  | 2,6E-02 | PREDICTED: Homo sapiens similar to huntingtin interacting protein 1 related (LOC728014), mRNA.                    |
| 940435  | TRIM8     |  | 1,35  | 3,3E-03 | Homo sapiens tripartite motif-containing 8 (TRIM8), mRNA.                                                         |
| 4880433 | IDH2      |  | 1,35  | 1,1E-02 | Homo sapiens isocitrate dehydrogenase 2 (NADP+), mitochondrial (IDH2)                                             |
| 1770685 | MYH10     |  | 1,35  | 4,4E-02 | Homo sapiens myosin, heavy chain 10, non-muscle (MYH10), mRNA.                                                    |
| 1500600 | RAB37     |  | 1,35  | 2,9E-02 | Homo sapiens RAB37, member RAS oncogene family (RAB37), transcript variant 3, mRNA.                               |
| 4010397 | PLEKHG3   |  | 1,34  | 2,6E-02 | Homo sapiens pleckstrin homology domain containing, family G (with RhoGef domain) member 3 (PLEKHG3)              |
| 7510408 | NRIP1     |  | 1,34  | 5,0E-04 | Homo sapiens nuclear receptor interacting protein 1 (NRIP1), mRNA.                                                |
| 6550441 | LOC645100 |  | 1,34  | 2,9E-02 | PREDICTED: Homo sapiens hCG1820764 (LOC645100), mRNA.                                                             |
| 4220026 | NUBP1     |  | 1,33  | 2,7E-03 | Homo sapiens nucleotide binding protein 1 (MinD homolog, E. coli) (NUBP1), mRNA.                                  |
| 5810068 | SIPA1     |  | 1,33  | 1,9E-02 | Homo sapiens signal-induced proliferation-associated gene 1 (SIPA1), transcript variant 2, mRNA.                  |
| 6860687 | PYCARD    |  | 1,32  | 2,2E-02 | Homo sapiens PYD and CARD domain containing (PYCARD), transcript variant 1, mRNA.                                 |
| 6550056 | IFNAR2    |  | 1,32  | 2,4E-02 | Homo sapiens interferon (alpha, beta and omega) receptor 2 (IFNAR2), transcript variant 3, mRNA.                  |
| 7210192 | ADA       |  | 1,32  | 2,9E-02 | Homo sapiens adenosine deaminase (ADA), mRNA.                                                                     |
| 3870484 | LUZP1     |  | 1,32  | 2,8E-02 | Homo sapiens leucine zipper protein 1 (LUZP1), mRNA.                                                              |
| 3180181 | UBE2G1    |  | 1,32  | 2,9E-02 | Homo sapiens ubiquitin-conjugating enzyme E2G 1 (UBC7 homolog, yeast) (UBE2G1), mRNA.                             |
| 6560181 | MTIF3     |  | 1,31  | 3,8E-03 | Homo sapiens mitochondrial translational initiation factor 3 (MTIF3), nuclear gene encoding mitochondrial protein |
| 2000451 | PYHIN1    |  | 1,31  | 8,4E-03 | Homo sapiens pyrin and HIN domain family, member 1 (PYHIN1), transcript variant b2, mRNA.                         |
| 10746   | TXNDC11   |  | 1,31  | 3,8E-03 | Homo sapiens thioredoxin domain containing 11 (TXNDC11), mRNA.                                                    |
| 3060603 | BACH2     |  | 1,31  | 3,2E-02 | Homo sapiens BTB and CNC homology 1, basic leucine zipper transcription factor 2 (BACH2), mRNA.                   |
| 3830184 | RAB37     |  | 1,31  | 1,9E-03 | Homo sapiens RAB37, member RAS oncogene family (RAB37), transcript variant 2, mRNA.                               |
| 4890021 | SEPT3     |  | -1,30 | 1,8E-02 | Homo sapiens septin 3 (SEPT3), transcript variant B, mRNA.                                                        |
| 6620026 | CD83      |  | -1,30 | 3,8E-02 | Homo sapiens CD83 molecule (CD83), transcript variant 1, mRNA.                                                    |
| 3850441 | MAZ       |  | -1,31 | 8,4E-03 | Homo sapiens MYC-associated zinc finger protein (purine-binding transcription factor) (MAZ)                       |
| 4040189 | RIMS3     |  | -1,31 | 3,3E-02 | Homo sapiens regulating synaptic membrane exocytosis 3 (RIMS3), mRNA.                                             |
| 2350398 | H2AFB1    |  | -1,31 | 2,4E-03 | Homo sapiens H2A histone family, member B1 (H2AFB1), mRNA.                                                        |
| 1240487 | LYRM4     |  | -1,31 | 1,8E-02 | Homo sapiens LYR motif containing 4 (LYRM4), mRNA.                                                                |
| 3390239 | LOC651158 |  | -1,31 | 1,3E-02 | PREDICTED: Homo sapiens similar to apolipoprotein B mRNA editing enzyme                                           |
| 4220091 | TSPO      |  | -1,31 | 2,9E-02 | Homo sapiens translocator protein (18kDa) (TSPO), transcript variant PBR-S, mRNA.                                 |
| 6580189 | LOC387820 |  | -1,31 | 1,9E-02 | PREDICTED: Homo sapiens similar to DnaJ (Hsp40) homolog, subfamily B, member 6 isoform a (LOC387820)              |
| 1770386 | MALT1     |  | -1,32 | 2,7E-02 | Homo sapiens mucosa associated lymphoid tissue lymphoma translocation gene 1 (MALT1), transcript variant 1        |
| 1770392 | MGC26718  |  | -1,32 | 1,4E-02 | Homo sapiens similar to ankyrin repeat domain 20A (MGC26718), mRNA.                                               |
| 4010433 | LOC650832 |  | -1,33 | 5,4E-03 | PREDICTED: Homo sapiens similar to mitogen-activated protein kinase kinase 3 isoform A (LOC650832), mRNA.         |
| 2810162 | LAT2      |  | -1,33 | 1,7E-02 | Homo sapiens linker for activation of T cells family, member 2 (LAT2), transcript variant 1, mRNA.                |
| 6560091 | TGFBR2    |  | -1,33 | 4,6E-02 | Homo sapiens transforming growth factor, beta receptor II (70/80kDa) (TGFBR2), transcript variant 1, mRNA.        |

|         |           |       |         |                                                                                                                      |
|---------|-----------|-------|---------|----------------------------------------------------------------------------------------------------------------------|
| 5690279 | FARS2     | -1,33 | 2,6E-02 | Homo sapiens phenylalanyl-tRNA synthetase 2, mitochondrial (FARS2)                                                   |
| 4250670 | SLC43A3   | -1,34 | 4,1E-02 | Homo sapiens solute carrier family 43, member 3 (SLC43A3), mRNA.                                                     |
| 6660161 | RNF144A   | -1,34 | 1,5E-02 | Homo sapiens ring finger protein 144A (RNF144A), mRNA.                                                               |
| 3140553 | SAR1A     | -1,34 | 2,0E-02 | Homo sapiens SAR1 gene homolog A ( <i>S. cerevisiae</i> ) (SAR1A), mRNA.                                             |
| 1030241 | ADK       | -1,35 | 4,3E-02 | Homo sapiens adenosine kinase (ADK), transcript variant ADK-short, mRNA.                                             |
| 7330044 | DYNLT3    | -1,35 | 3,7E-02 | Homo sapiens dynein, light chain, Tctex-type 3 (DYNLT3), mRNA.                                                       |
| 5050162 | CD83      | -1,35 | 8,9E-03 | Homo sapiens CD83 molecule (CD83), transcript variant 2, mRNA.                                                       |
| 2000646 | B4GALT4   | -1,36 | 2,2E-02 | Homo sapiens UDP-Gal:betaGlcNAc beta 1,4- galactosyltransferase, polypeptide 4 (B4GALT4)                             |
| 7050600 | RARA      | -1,37 | 2,5E-02 | Homo sapiens retinoic acid receptor, alpha (RARA), transcript variant 1, mRNA.                                       |
| 3450136 | RNF144    | -1,37 | 2,5E-02 | Homo sapiens ring finger protein 144 (RNF144), mRNA.                                                                 |
| 3060092 | LAT2      | -1,37 | 3,7E-03 | Homo sapiens linker for activation of T cells family, member 2 (LAT2), transcript variant 1, mRNA.                   |
| 7000224 | SIRT1     | -1,37 | 2,4E-02 | Homo sapiens sirtuin (silent mating type information regulation 2 homolog) 1 ( <i>S. cerevisiae</i> ) (SIRT1), mRNA. |
| 4230021 | NCK2      | -1,37 | 2,6E-03 | Homo sapiens NCK adaptor protein 2 (NCK2), transcript variant 2, mRNA.                                               |
| 1510390 | NANS      | -1,37 | 7,4E-03 | Homo sapiens N-acetylneuraminic acid synthase (sialic acid synthase) (NANS), mRNA.                                   |
| 1430424 | RFFL      | -1,38 | 9,3E-03 | Homo sapiens ring finger and FYVE-like domain containing 1 (RFFL), transcript variant 1, mRNA.                       |
| 5870307 | LOC440359 | -1,38 | 2,2E-02 | PREDICTED: Homo sapiens similar to muscle Y-box protein YB2 (LOC440359), mRNA.                                       |
| 2060288 | PLP2      | -1,38 | 2,2E-02 | Homo sapiens proteolipid protein 2 (colonic epithelium-enriched) (PLP2), mRNA.                                       |
| 4220605 | ETS2      | -1,39 | 1,9E-03 | Homo sapiens v-ets erythroblastosis virus E26 oncogene homolog 2 (avian) (ETS2), mRNA.                               |
| 6250192 | COL6A3    | -1,40 | 4,6E-02 | Homo sapiens collagen, type VI, alpha 3 (COL6A3), transcript variant 3, mRNA.                                        |
| 1740242 | FVT1      | -1,40 | 3,7E-03 | Homo sapiens follicular lymphoma variant translocation 1 (FVT1), mRNA.                                               |
| 7150692 | LOC642732 | -1,40 | 9,1E-03 | PREDICTED: Homo sapiens misc_RNA (LOC642732), miscRNA.                                                               |
| 2810315 | S100A6    | -1,40 | 9,2E-03 | Homo sapiens S100 calcium binding protein A6 (S100A6), mRNA.                                                         |
| 6760451 | DIXDC1    | -1,41 | 1,8E-02 | Homo sapiens DIX domain containing 1 (DIXDC1), transcript variant 1, mRNA.                                           |
| 6580019 | LOC731954 | -1,41 | 4,7E-04 | PREDICTED: Homo sapiens similar to supervillin (LOC731954), mRNA.                                                    |
| 4850014 | ARID5A    | -1,41 | 2,0E-02 | Homo sapiens AT rich interactive domain 5A (MRF1-like) (ARID5A), mRNA.                                               |
| 5550431 | MMD       | -1,42 | 3,4E-02 | Homo sapiens monocyte to macrophage differentiation-associated (MMD), mRNA.                                          |
| 4670162 | CTSH      | -1,42 | 8,5E-03 | Homo sapiens cathepsin H (CTSH), transcript variant 1, mRNA.                                                         |
| 4150519 | FAM108C1  | -1,42 | 1,6E-03 | Homo sapiens family with sequence similarity 108, member C1 (FAM108C1), mRNA.                                        |
| 6580408 | CTSW      | -1,42 | 9,9E-03 | Homo sapiens cathepsin W (CTSW), mRNA.                                                                               |
| 6280176 | GBE1      | -1,43 | 3,8E-02 | Homo sapiens glucan (1,4-alpha-), branching enzyme 1                                                                 |
| 1170673 | TNFSF14   | -1,44 | 8,5E-03 | Homo sapiens tumor necrosis factor (ligand) superfamily, member 14 (TNFSF14), transcript variant 2, mRNA.            |
| 3140603 | SVIL      | -1,44 | 2,6E-03 | Homo sapiens supervillin (SVIL), transcript variant 1, mRNA.                                                         |
| 70288   | HS.150067 | -1,44 | 2,6E-02 | Homo sapiens cDNA FLJ43367 fis, clone NT2RP8000435                                                                   |
| 1030102 | RGS16     | -1,45 | 2,7E-02 | Homo sapiens regulator of G-protein signalling 16 (RGS16), mRNA.                                                     |
| 1470215 | MAP3K8    | -1,45 | 3,2E-02 | Homo sapiens mitogen-activated protein kinase kinase kinase 8 (MAP3K8), mRNA.                                        |
| 5720470 | LOC653381 | -1,46 | 6,0E-03 | PREDICTED: Homo sapiens similar to Sorbitol dehydrogenase (L-iditol 2-dehydrogenase) (LOC653381), mRNA.              |
| 60706   | SDCCAG3   | -1,46 | 4,6E-03 | Homo sapiens serologically defined colon cancer antigen 3 (SDCCAG3), transcript variant 3, mRNA.                     |

|         |          |       |         |                                                                                                           |
|---------|----------|-------|---------|-----------------------------------------------------------------------------------------------------------|
| 770592  | TNFSF14  | -1,46 | 3,8E-03 | Homo sapiens tumor necrosis factor (ligand) superfamily, member 14 (TNFSF14), transcript variant 1, mRNA. |
| 7040553 | SDCCAG3  | -1,47 | 2,3E-03 | Homo sapiens serologically defined colon cancer antigen 3 (SDCCAG3), transcript variant 3, mRNA.          |
| 3520601 | MPO      | -1,47 | 3,0E-04 | Homo sapiens myeloperoxidase (MPO), nuclear gene encoding mitochondrial protein, mRNA.                    |
| 6550600 | MYC      | -1,47 | 1,4E-02 | Homo sapiens v-myc myelocytomatosis viral oncogene homolog (avian) (MYC), mRNA.                           |
| 3420739 | SNTB1    | -1,48 | 3,3E-04 | Homo sapiens syntrophin, beta 1 (dystrophin-associated protein A1, 59kDa, basic component 1) (SNTB1)      |
| 3930019 | IL12RB2  | -1,49 | 3,8E-03 | Homo sapiens interleukin 12 receptor, beta 2 (IL12RB2), mRNA.                                             |
| 2940438 | PTGER4   | -1,49 | 1,6E-03 | Homo sapiens prostaglandin E receptor 4 (subtype EP4) (PTGER4), mRNA.                                     |
| 5670424 | GNA15    | -1,50 | 2,7E-02 | Homo sapiens guanine nucleotide binding protein (G protein), alpha 15 (Gq class) (GNA15), mRNA.           |
| 610270  | ELL2     | -1,51 | 2,6E-03 | Homo sapiens elongation factor, RNA polymerase II, 2 (ELL2), mRNA.                                        |
| 2850576 | SEMA4A   | -1,51 | 2,2E-02 | Homo sapiens sema domain, Ig, transmembrane domain (TM) and short cytoplasmic domain, (semaphorin) 4A     |
| 6110328 | ATP6V0A4 | -1,52 | 5,1E-03 | Homo sapiens ATPase, H+ transporting, lysosomal V0 subunit a4 (ATP6V0A4), transcript variant 2, mRNA.     |
| 1980288 | CTSH     | -1,52 | 3,1E-03 | Homo sapiens cathepsin H (CTSH), transcript variant 1, mRNA.                                              |
| 3940088 | ZBED2    | -1,54 | 1,7E-02 | Homo sapiens zinc finger, BED-type containing 2 (ZBED2), mRNA.                                            |
| 3990646 | ITPR1    | -1,56 | 6,2E-03 | Homo sapiens inositol 1,4,5-triphosphate receptor, type 1 (ITPR1), transcript variant 2, mRNA.            |
| 7200703 | KAT2B    | -1,56 | 1,4E-03 | Homo sapiens K(lysine) acetyltransferase 2B (KAT2B), mRNA.                                                |
| 2710341 | PRNP     | -1,56 | 6,7E-04 | Homo sapiens prion protein (PRNP), transcript variant 2, mRNA.                                            |
| 2570176 | NAPSB    | -1,57 | 2,2E-02 | PREDICTED: Homo sapiens napsin B aspartic peptidase pseudogene, transcript variant 3 (NAPSB), misc RNA.   |
| 3170162 | PRNP     | -1,57 | 8,5E-04 | Homo sapiens prion protein (PRNP), transcript variant 3, mRNA.                                            |
| 1660296 | ID2      | -1,60 | 6,0E-03 | Homo sapiens inhibitor of DNA binding 2, dominant negative helix-loop-helix protein (ID2), mRNA.          |
| 6550008 | IL26     | -1,64 | 6,2E-03 | Homo sapiens interleukin 26 (IL26), mRNA.                                                                 |
| 730739  | TCEAL3   | -1,64 | 5,7E-06 | Homo sapiens transcription elongation factor A (SII)-like 3 (TCEAL3), transcript variant 2, mRNA.         |
| 6400647 | EHD4     | -1,64 | 2,5E-04 | Homo sapiens EH-domain containing 4 (EHD4), mRNA.                                                         |
| 540706  | HLF      | -1,64 | 7,4E-03 | Homo sapiens hepatic leukemia factor (HLF), mRNA.                                                         |
| 4490025 | KIF21B   | -1,65 | 6,2E-03 | Homo sapiens kinesin family member 21B (KIF21B), mRNA.                                                    |
| 6620392 | LFNG     | -1,66 | 2,3E-04 | Homo sapiens LFNG O-fucosylpeptide 3-beta-N-acetylglucosaminyltransferase (LFNG), transcript variant 1    |
| 5270674 | GPR68    | -1,66 | 8,3E-04 | Homo sapiens G protein-coupled receptor 68 (GPR68), mRNA.                                                 |
| 3060735 | IL1RN    | -1,70 | 1,1E-02 | Homo sapiens interleukin 1 receptor antagonist (IL1RN), transcript variant 4, mRNA.                       |
| 3940435 | EMP1     | -1,72 | 1,6E-03 | Homo sapiens epithelial membrane protein 1 (EMP1), mRNA.                                                  |
| 3180053 | FAM129B  | -1,72 | 1,6E-03 | Homo sapiens family with sequence similarity 129, member B (FAM129B), transcript variant 1, mRNA.         |
| 5290243 | ATP6V0A4 | -1,77 | 9,1E-03 | Homo sapiens ATPase, H+ transporting, lysosomal V0 subunit a4 (ATP6V0A4), transcript variant 1, mRNA.     |
| 6900538 | DNAJC12  | -1,78 | 8,5E-03 | Homo sapiens DnaJ (Hsp40) homolog, subfamily C, member 12 (DNAJC12), transcript variant 2, mRNA.          |
| 610113  | TNFSF14  | -1,80 | 3,7E-04 | Homo sapiens tumor necrosis factor (ligand) superfamily, member 14 (TNFSF14), transcript variant 1, mRNA. |
| 380019  | DDIT4L   | -1,80 | 1,9E-02 | Homo sapiens DNA-damage-inducible transcript 4-like (DDIT4L), mRNA.                                       |
| 3780053 | PALLD    | -1,80 | 1,5E-02 | Homo sapiens palladin, cytoskeletal associated protein (PALLD), transcript variant 2, mRNA.               |
| 1820594 | HBEGF    | -1,80 | 8,4E-03 | Homo sapiens heparin-binding EGF-like growth factor (HBEGF), mRNA.                                        |
| 4780072 | TCEAL3   | -1,81 | 2,5E-06 | Homo sapiens transcription elongation factor A (SII)-like 3 (TCEAL3), transcript variant 1, mRNA.         |
| 1190367 | IER3     | -1,82 | 8,5E-04 | Homo sapiens immediate early response 3 (IER3), mRNA.                                                     |

|         |          |       |         |                                                                                                             |
|---------|----------|-------|---------|-------------------------------------------------------------------------------------------------------------|
| 730047  | SERPINA1 | -1,82 | 1,4E-02 | Homo sapiens serpin peptidase inhibitor, clade A (alpha-1 antiproteinase, antitrypsin), member 1 (SERPINA1) |
| 5720465 | DNAJC12  | -1,83 | 3,8E-03 | Homo sapiens DnaJ (Hsp40) homolog, subfamily C, member 12 (DNAJC12), transcript variant 1, mRNA.            |
| 2070037 | ICOS     | -1,87 | 1,6E-06 | Homo sapiens inducible T-cell co-stimulator (ICOS), mRNA.                                                   |
| 6040332 | IL3      | -1,88 | 2,2E-02 | Homo sapiens interleukin 3 (colony-stimulating factor, multiple) (IL3), mRNA.                               |
| 2630768 | LMNA     | -1,93 | 9,5E-06 | Homo sapiens lamin A/C (LMNA), transcript variant 2, mRNA.                                                  |
| 1740451 | IL1R2    | -1,93 | 3,5E-03 | Homo sapiens interleukin 1 receptor, type II (IL1R2), transcript variant 2, mRNA.                           |
| 6420736 | DNAJC12  | -1,94 | 6,3E-03 | Homo sapiens DnaJ (Hsp40) homolog, subfamily C, member 12 (DNAJC12), transcript variant 2, mRNA.            |
| 6940358 | SELL     | -1,95 | 6,7E-04 | Homo sapiens selectin L (SELL), mRNA.                                                                       |
| 7000356 | RXRA     | -1,97 | 3,1E-03 | Homo sapiens retinoid X receptor, alpha (RXRA), mRNA.                                                       |
| 6900703 | ARHGEF10 | -2,04 | 3,5E-03 | Homo sapiens Rho guanine nucleotide exchange factor (GEF) 10 (ARHGEF10), mRNA.                              |
| 3290259 | NAPSB    | -2,06 | 1,0E-02 | Homo sapiens napsin B aspartic peptidase pseudogene (NAPSB), non-coding RNA. XR_001413                      |
| 3990040 | IL1R2    | -2,06 | 6,3E-04 | Homo sapiens interleukin 1 receptor, type II (IL1R2), transcript variant 2, mRNA.                           |
| 2450411 | DNAJC12  | -2,16 | 4,7E-04 | Homo sapiens DnaJ (Hsp40) homolog, subfamily C, member 12 (DNAJC12), transcript variant 1, mRNA.            |
| 6020424 | LMNA     | -3,01 | 2,5E-06 | Homo sapiens lamin A/C (LMNA), transcript variant 2, mRNA.                                                  |
| 7610131 | EPAS1    | -3,07 | 1,1E-03 | Homo sapiens endothelial PAS domain protein 1 (EPAS1), mRNA.                                                |

| <b>Supplemental Table 3: Transcripts modulated by ATRA in CCR6- T-cells</b> |               |                    |                  |                                                                                                         |
|-----------------------------------------------------------------------------|---------------|--------------------|------------------|---------------------------------------------------------------------------------------------------------|
| <b>ProbeID</b>                                                              | <b>SYMBOL</b> | <b>Fold Change</b> | <b>adj.P.Val</b> | <b>Definition</b>                                                                                       |
| 2100296                                                                     | NAPSA         | 3,6                | 2,2E-08          | Homo sapiens napsin A aspartic peptidase (NAPSA), mRNA.                                                 |
| 2760500                                                                     | CD38          | 3,2                | 2,4E-10          | Homo sapiens CD38 molecule (CD38), mRNA.                                                                |
| 7320441                                                                     | C7ORF68       | 2,6                | 1,6E-02          | Homo sapiens chromosome 7 open reading frame 68 (C7orf68), transcript variant 1, mRNA.                  |
| 4540176                                                                     | EVI5          | 2,6                | 8,2E-08          | Homo sapiens ecotropic viral integration site 5 (EVI5), mRNA.                                           |
| 1240142                                                                     | SAMD9         | 2,6                | 4,6E-07          | Homo sapiens sterile alpha motif domain containing 9 (SAMD9), mRNA.                                     |
| 1510008                                                                     | GALR2         | 2,5                | 1,2E-03          | Homo sapiens galanin receptor 2 (GALR2), mRNA.                                                          |
| 7040670                                                                     | DHRS3         | 2,4                | 5,1E-05          | Homo sapiens dehydrogenase/reductase (SDR family) member 3 (DHRS3), mRNA.                               |
| 240682                                                                      | ANKRD37       | 2,3                | 2,4E-03          | Homo sapiens ankyrin repeat domain 37 (ANKRD37), mRNA.                                                  |
| 5900471                                                                     | PTGER2        | 2,3                | 8,2E-08          | Homo sapiens prostaglandin E receptor 2 (subtype EP2), 53kDa (PTGER2), mRNA.                            |
| 5900358                                                                     | SLC26A4       | 2,3                | 1,5E-05          | Homo sapiens solute carrier family 26, member 4 (SLC26A4), mRNA.                                        |
| 2650564                                                                     | RARRES3       | 2,2                | 1,2E-03          | Homo sapiens retinoic acid receptor responder (tazarotene induced) 3 (RARRES3), mRNA.                   |
| 5720725                                                                     | ARG2          | 2,2                | 8,0E-04          | Homo sapiens arginase, type II (ARG2), nuclear gene encoding mitochondrial protein, mRNA.               |
| 3400431                                                                     | CLDN11        | 2,1                | 4,7E-04          | Homo sapiens claudin 11 (oligodendrocyte transmembrane protein) (CLDN11), mRNA.                         |
| 2510593                                                                     | HRASLS3       | 2,1                | 1,0E-05          | Homo sapiens HRAS-like suppressor 3 (HRASLS3), mRNA.                                                    |
| 830201                                                                      | TSKU          | 2,1                | 6,7E-04          | Homo sapiens tsukushin (TSKU), mRNA.                                                                    |
| 6250154                                                                     | LZTFL1        | 2,0                | 4,6E-07          | Homo sapiens leucine zipper transcription factor-like 1 (LZTFL1), mRNA.                                 |
| 6420605                                                                     | UBD           | 1,9                | 9,8E-03          | Homo sapiens ubiquitin D (UBD), mRNA.                                                                   |
| 2750280                                                                     | CDK5R1        | 1,9                | 2,8E-05          | Homo sapiens cyclin-dependent kinase 5, regulatory subunit 1 (p35) (CDK5R1), mRNA.                      |
| 3710068                                                                     | WARS          | 1,9                | 1,3E-04          | Homo sapiens tryptophanyl-tRNA synthetase (WARS), transcript variant 2, mRNA.                           |
| 5700753                                                                     | CEACAM1       | 1,9                | 7,5E-06          | Homo sapiens carcinoembryonic antigen-related cell adhesion molecule 1 (biliary glycoprotein) (CEACAM1) |
| 4200209                                                                     | RBKS          | 1,9                | 2,0E-02          | Homo sapiens ribokinase (RBKS), mRNA.                                                                   |
| 4860224                                                                     | WARS          | 1,9                | 1,9E-05          | Homo sapiens tryptophanyl-tRNA synthetase (WARS), transcript variant 1, mRNA.                           |
| 2940291                                                                     | QPRT          | 1,9                | 9,5E-04          | Homo sapiens quinolinate phosphoribosyltransferase (QPRT), mRNA.                                        |
| 5960440                                                                     | VDR           | 1,8                | 4,9E-04          | Homo sapiens vitamin D (1,25- dihydroxyvitamin D3) receptor (VDR), transcript variant 1, mRNA.          |
| 870630                                                                      | CA2           | 1,8                | 3,6E-04          | Homo sapiens carbonic anhydrase II (CA2), mRNA.                                                         |
| 6180427                                                                     | G0S2          | 1,8                | 2,5E-03          | Homo sapiens G0/G1switch 2 (G0S2), mRNA.                                                                |
| 1260270                                                                     | AIM2          | 1,7                | 6,7E-05          | Homo sapiens absent in melanoma 2 (AIM2), mRNA.                                                         |
| 3170068                                                                     | APOBEC3B      | 1,7                | 1,4E-03          | Homo sapiens apolipoprotein B mRNA editing enzyme, catalytic polypeptide-like 3B (APOBEC3B), mRNA.      |
| 4120379                                                                     | GFI1          | 1,7                | 1,1E-03          | Homo sapiens growth factor independent 1 transcription repressor (GFI1), mRNA.                          |
| 20477                                                                       | HIC1          | 1,7                | 1,1E-06          | Homo sapiens hypermethylated in cancer 1 (HIC1), transcript variant 2, mRNA.                            |
| 6100414                                                                     | UPRT          | 1,7                | 2,6E-02          | Homo sapiens uracil phosphoribosyltransferase (FUR1) homolog ( <i>S. cerevisiae</i> ) (UPRT), mRNA.     |
| 6480209                                                                     | RRAGD         | 1,7                | 8,4E-03          | Homo sapiens Ras-related GTP binding D (RRAGD), mRNA.                                                   |
| 7570673                                                                     | UPP1          | 1,7                | 9,2E-03          | Homo sapiens uridine phosphorylase 1 (UPP1), transcript variant 1, mRNA.                                |
| 4560129                                                                     | LGMN          | 1,7                | 2,7E-02          | Homo sapiens legumain (LGMN), transcript variant 2, mRNA.                                               |
| 5900725                                                                     | PHLDA1        | 1,6                | 8,3E-03          | Homo sapiens pleckstrin homology-like domain, family A, member 1 (PHLDA1), mRNA.                        |

|         |           |     |         |                                                                                                                  |
|---------|-----------|-----|---------|------------------------------------------------------------------------------------------------------------------|
| 4810520 | TRIB1     | 1,6 | 2,5E-03 | Homo sapiens tribbles homolog 1 (Drosophila) (TRIB1), mRNA.                                                      |
| 5290465 | CASP7     | 1,6 | 5,4E-06 | Homo sapiens caspase 7, apoptosis-related cysteine peptidase (CASP7), transcript variant gamma, mRNA.            |
| 5310554 | MPP1      | 1,6 | 3,2E-04 | Homo sapiens membrane protein, palmitoylated 1, 55kDa (MPP1), mRNA.                                              |
| 6100372 | FIGNL1    | 1,6 | 1,6E-04 | Homo sapiens fidgetin-like 1 (FIGNL1), transcript variant 1, mRNA.                                               |
| 450538  | RBPJ      | 1,6 | 3,5E-03 | Homo sapiens recombination signal binding protein for immunoglobulin kappa J region (RBPJ), transcript variant 1 |
| 610154  | CLDND2    | 1,6 | 1,3E-02 | Homo sapiens claudin domain containing 2 (CLDND2), mRNA.                                                         |
| 1690609 | CFI       | 1,6 | 4,3E-03 | Homo sapiens complement factor I (CFI), mRNA.                                                                    |
| 5890593 | FIGNL1    | 1,6 | 1,9E-04 | Homo sapiens fidgetin-like 1 (FIGNL1), transcript variant 1, mRNA.                                               |
| 4150520 | RIPK2     | 1,6 | 2,9E-03 | Homo sapiens receptor-interacting serine-threonine kinase 2 (RIPK2), mRNA.                                       |
| 7160563 | SMG6      | 1,6 | 3,1E-05 | Homo sapiens Smg-6 homolog, nonsense mediated mRNA decay factor (C. elegans) (SMG6), mRNA.                       |
| 630278  | H1F0      | 1,6 | 4,8E-02 | Homo sapiens H1 histone family, member 0 (H1F0), mRNA.                                                           |
| 940148  | ABTB2     | 1,6 | 3,2E-04 | Homo sapiens ankyrin repeat and BTB (POZ) domain containing 2 (ABTB2), mRNA.                                     |
| 2600324 | TMEM147   | 1,6 | 9,5E-04 | Homo sapiens transmembrane protein 147 (TMEM147), mRNA.                                                          |
| 2070039 | INSIG2    | 1,6 | 4,8E-02 | Homo sapiens insulin induced gene 2 (INSIG2), mRNA.                                                              |
| 4150014 | CEACAM1   | 1,5 | 1,1E-03 | Homo sapiens carcinoembryonic antigen-related cell adhesion molecule 1 (biliary glycoprotein) (CEACAM1)          |
| 5810132 | HSD11B1   | 1,5 | 1,1E-03 | Homo sapiens hydroxysteroid (11-beta) dehydrogenase 1 (HSD11B1), transcript variant 2, mRNA.                     |
| 7320437 | DSCR3     | 1,5 | 2,9E-04 | Homo sapiens Down syndrome critical region gene 3 (DSCR3), mRNA.                                                 |
| 3310692 | SPRY1     | 1,5 | 1,6E-02 | Homo sapiens sprouty homolog 1, antagonist of FGF signaling (Drosophila) (SPRY1), transcript variant 2, mRNA.    |
| 5670040 | ELOVL6    | 1,5 | 1,7E-03 | Homo sapiens ELOVL family member 6, elongation of long chain fatty acids (FEN1/Elo2, SUR4/Elo3-like, yeast)      |
| 1300452 | LGMN      | 1,5 | 4,3E-02 | Homo sapiens legumain (LGMN), transcript variant 2, mRNA.                                                        |
| 5420564 | NFIL3     | 1,5 | 2,0E-02 | Homo sapiens nuclear factor, interleukin 3 regulated (NFIL3), mRNA.                                              |
| 2680050 | SIRPG     | 1,5 | 3,8E-02 | Homo sapiens signal-regulatory protein gamma (SIRPG), transcript variant 2, mRNA.                                |
| 3290025 | LOC730074 | 1,5 | 9,5E-04 | PREDICTED: Homo sapiens hypothetical LOC730074 (LOC730074), mRNA.                                                |
| 2690273 | BCAP29    | 1,5 | 8,5E-04 | Homo sapiens B-cell receptor-associated protein 29 (BCAP29), transcript variant 2, mRNA.                         |
| 5720424 | NRP1      | 1,5 | 1,1E-03 | Homo sapiens neuropilin 1 (NRP1), transcript variant 1, mRNA.                                                    |
| 1340750 | SRP68     | 1,5 | 1,0E-04 | Homo sapiens signal recognition particle 68kDa (SRP68), mRNA.                                                    |
| 510114  | CCNB1IP1  | 1,5 | 1,1E-02 | Homo sapiens cyclin B1 interacting protein 1 (CCNB1IP1), transcript variant 3, mRNA.                             |
| 3060703 | LOC81691  | 1,5 | 3,0E-03 | Homo sapiens exonuclease NEF-sp (LOC81691), mRNA.                                                                |
| 4670327 | FBXO7     | 1,5 | 1,9E-03 | Homo sapiens F-box protein 7 (FBXO7), transcript variant 2, mRNA.                                                |
| 770682  | MGC29506  | 1,5 | 4,8E-02 | Homo sapiens hypothetical protein MGC29506 (MGC29506), mRNA.                                                     |
| 3460008 | TMEM173   | 1,4 | 1,9E-03 | Homo sapiens transmembrane protein 173 (TMEM173), nuclear gene encoding mitochondrial protein, mRNA.             |
| 2060674 | CA2       | 1,4 | 3,4E-02 | Homo sapiens carbonic anhydrase II (CA2), mRNA.                                                                  |
| 5720598 | MYO1B     | 1,4 | 1,8E-03 | Homo sapiens myosin IB (MYO1B), mRNA.                                                                            |
| 6480204 | THY1      | 1,4 | 8,4E-03 | Homo sapiens Thy-1 cell surface antigen (THY1), mRNA.                                                            |
| 5820491 | MAP7      | 1,4 | 5,7E-04 | Homo sapiens microtubule-associated protein 7 (MAP7), mRNA.                                                      |
| 6550209 | KIF2A     | 1,4 | 8,3E-03 | Homo sapiens kinesin heavy chain member 2A (KIF2A), mRNA.                                                        |
| 1410010 | PDLIM1    | 1,4 | 1,5E-04 | Homo sapiens PDZ and LIM domain 1 (PDLIM1), mRNA.                                                                |



|         |              |     |         |                                                                                                                  |
|---------|--------------|-----|---------|------------------------------------------------------------------------------------------------------------------|
| 10044   | BCAP29       | 1,4 | 3,8E-03 | Homo sapiens B-cell receptor-associated protein 29 (BCAP29), transcript variant 1, mRNA.                         |
| 3890193 | CLIC4        | 1,4 | 1,6E-02 | Homo sapiens chloride intracellular channel 4 (CLIC4), nuclear gene encoding mitochondrial protein, mRNA.        |
| 10722   | CENPV        | 1,4 | 2,0E-02 | Homo sapiens centromere protein V (CENPV), mRNA.                                                                 |
| 1400450 | BRE          | 1,4 | 1,2E-02 | Homo sapiens brain and reproductive organ-expressed (TNFRSF1A modulator) (BRE), transcript variant 3, mRNA.      |
| 2450554 | RBPJ         | 1,4 | 7,1E-03 | Homo sapiens recombination signal binding protein for immunoglobulin kappa J region (RBPJ), transcript variant 4 |
| 5870632 | TM9SF2       | 1,4 | 2,6E-02 | Homo sapiens transmembrane 9 superfamily member 2 (TM9SF2), mRNA.                                                |
| 990343  | SP4          | 1,4 | 4,4E-03 | Homo sapiens Sp4 transcription factor (SP4), mRNA.                                                               |
| 2510039 | ENDOD1       | 1,4 | 2,7E-02 | Homo sapiens endonuclease domain containing 1 (ENDOD1), mRNA.                                                    |
| 6980370 | IRF4         | 1,4 | 3,4E-02 | Homo sapiens interferon regulatory factor 4 (IRF4), mRNA.                                                        |
| 450382  | LOC441073    | 1,4 | 2,3E-02 | PREDICTED: Homo sapiens misc_RNA (LOC441073), miscRNA.                                                           |
| 3120475 | MAP7         | 1,4 | 1,9E-04 | Homo sapiens microtubule-associated protein 7 (MAP7), mRNA.                                                      |
| 7650440 | BACH2        | 1,4 | 1,1E-02 | Homo sapiens BTB and CNC homology 1, basic leucine zipper transcription factor 2 (BACH2), mRNA.                  |
| 1030026 | CENPV        | 1,4 | 1,6E-02 | Homo sapiens centromere protein V (CENPV), mRNA.                                                                 |
| 2190121 | GGA2         | 1,4 | 3,2E-02 | Homo sapiens golgi associated, gamma adaptin ear containing, ARF binding protein 2 (GGA2), mRNA.                 |
| 1010682 | ARIH2        | 1,4 | 2,1E-02 | Homo sapiens ariadne homolog 2 (Drosophila) (ARIH2), mRNA.                                                       |
| 780022  | LOC100132299 | 1,4 | 1,1E-02 | PREDICTED: Homo sapiens similar to MSTP075 (LOC100132299), mRNA.                                                 |
| 3890017 | CTNNA1       | 1,4 | 2,7E-02 | Homo sapiens catenin (cadherin-associated protein), alpha 1, 102kDa (CTNNA1), mRNA.                              |
| 2970730 | MYADM        | 1,4 | 1,9E-03 | Homo sapiens myeloid-associated differentiation marker (MYADM), transcript variant 4, mRNA.                      |
| 50746   | HSD11B1      | 1,4 | 4,6E-03 | Homo sapiens hydroxysteroid (11-beta) dehydrogenase 1 (HSD11B1), transcript variant 1, mRNA.                     |
| 7400114 | ANKRA2       | 1,4 | 2,8E-02 | Homo sapiens ankyrin repeat, family A (RFKANK-like), 2 (ANKRA2), mRNA.                                           |
| 6220133 | HSD11B1      | 1,4 | 1,2E-03 | Homo sapiens hydroxysteroid (11-beta) dehydrogenase 1 (HSD11B1), transcript variant 2, mRNA.                     |
| 1340634 | GLB1         | 1,4 | 3,2E-02 | Homo sapiens galactosidase, beta 1 (GLB1), transcript variant 2, mRNA.                                           |
| 1510440 | RPA1         | 1,4 | 1,6E-02 | Homo sapiens replication protein A1, 70kDa (RPA1), mRNA.                                                         |
| 5900592 | MGAT1        | 1,3 | 2,0E-02 | Homo sapiens mannosyl (alpha-1,3-)-glycoprotein beta-1,2-N-acetylglucosaminyltransferase (MGAT1), mRNA.          |
| 4070053 | BCAR3        | 1,3 | 4,6E-03 | Homo sapiens breast cancer anti-estrogen resistance 3 (BCAR3), mRNA.                                             |
| 6250040 | NAB1         | 1,3 | 2,8E-03 | Homo sapiens NGFI-A binding protein 1 (EGR1 binding protein 1) (NAB1), mRNA.                                     |
| 4490053 | IL10RA       | 1,3 | 4,3E-02 | Homo sapiens interleukin 10 receptor, alpha (IL10RA), mRNA.                                                      |
| 4850176 | RNMT         | 1,3 | 2,5E-02 | Homo sapiens RNA (guanine-7-) methyltransferase (RNMT), mRNA.                                                    |
| 7000307 | ACSL4        | 1,3 | 1,1E-03 | Homo sapiens acyl-CoA synthetase long-chain family member 4 (ACSL4), transcript variant 1, mRNA.                 |
| 4250670 | SLC43A3      | 1,3 | 4,9E-02 | Homo sapiens solute carrier family 43, member 3 (SLC43A3), mRNA.                                                 |
| 6280184 | MAN1C1       | 1,3 | 2,5E-02 | Homo sapiens mannosidase, alpha, class 1C, member 1 (MAN1C1), mRNA.                                              |
| 3120671 | RPA1         | 1,3 | 2,2E-02 | Homo sapiens replication protein A1, 70kDa (RPA1), mRNA.                                                         |
| 4120671 | SSBP3        | 1,3 | 4,6E-02 | Homo sapiens single stranded DNA binding protein 3 (SSBP3), transcript variant 2, mRNA.                          |
| 4250288 | UFSP2        | 1,3 | 2,7E-02 | Homo sapiens UFM1-specific peptidase 2 (UFSP2), mRNA.                                                            |
| 1570538 | GTF2E2       | 1,3 | 1,1E-03 | Homo sapiens general transcription factor IIE, polypeptide 2, beta 34kDa (GTF2E2), mRNA.                         |
| 5080280 | SEMA4B       | 1,3 | 7,4E-03 | Homo sapiens sema domain, Ig domain, transmembrane domain (TM) and short cytoplasmic domain                      |
| 4570358 | CNTNAP1      | 1,3 | 2,6E-02 | Homo sapiens contactin associated protein 1 (CNTNAP1), mRNA.                                                     |

|         |              |      |         |                                                                                                                |
|---------|--------------|------|---------|----------------------------------------------------------------------------------------------------------------|
| 2900187 | CNIH         | 1,3  | 1,9E-02 | Homo sapiens cornichon homolog (Drosophila) (CNIH), transcript variant 2, mRNA.                                |
| 2100524 | SPG11        | 1,3  | 4,5E-02 | Homo sapiens spastic paraplegia 11 (autosomal recessive) (SPG11), transcript variant 1, mRNA.                  |
| 3140041 | SP140        | 1,3  | 8,3E-03 | Homo sapiens SP140 nuclear body protein (SP140), transcript variant 1, mRNA.                                   |
| 6550441 | LOC645100    | 1,3  | 5,0E-02 | PREDICTED: Homo sapiens hCG1820764 (LOC645100), mRNA.                                                          |
| 6650176 | TRMT11       | 1,3  | 9,4E-03 | Homo sapiens tRNA methyltransferase 11 homolog (S. cerevisiae) (TRMT11), mRNA.                                 |
| 6560402 | NR3C1        | 1,3  | 2,6E-02 | Homo sapiens nuclear receptor subfamily 3, group C, member 1 (glucocorticoid receptor) (NR3C1)                 |
| 2760224 | FOXP1        | 1,3  | 3,8E-02 | Homo sapiens forkhead box P1 (FOXP1), transcript variant 1, mRNA.                                              |
| 360612  | LOC100131940 | 1,3  | 1,6E-02 | PREDICTED: Homo sapiens misc_RNA (LOC100131940), miscRNA.                                                      |
| 6840615 | PRKCB        | 1,3  | 2,3E-02 | Homo sapiens protein kinase C, beta (PRKCB), transcript variant 1, mRNA.                                       |
| 830768  | FLJ43681     | 1,3  | 4,3E-02 | PREDICTED: Homo sapiens similar to 60S ribosomal protein L23a (FLJ43681), miscRNA.                             |
| 360689  | HEBP1        | -1,3 | 3,8E-02 | Homo sapiens heme binding protein 1 (HEBP1), mRNA.                                                             |
| 6480468 | BEX1         | -1,3 | 1,7E-02 | Homo sapiens brain expressed, X-linked 1 (BEX1), mRNA.                                                         |
| 2320133 | TXNRD1       | -1,3 | 9,0E-04 | Homo sapiens thioredoxin reductase 1 (TXNRD1), transcript variant 4, mRNA.                                     |
| 5050162 | CD83         | -1,3 | 2,5E-02 | Homo sapiens CD83 molecule (CD83), transcript variant 2, mRNA.                                                 |
| 1740433 | MSL3L1       | -1,3 | 1,1E-02 | Homo sapiens male-specific lethal 3-like 1 (Drosophila) (MSL3L1), transcript variant 1, mRNA.                  |
| 1770358 | ZDHHC16      | -1,3 | 2,3E-02 | Homo sapiens zinc finger, DHHC-type containing 16 (ZDHHC16), transcript variant 1, mRNA.                       |
| 2900731 | PCSK7        | -1,3 | 1,7E-02 | Homo sapiens proprotein convertase subtilisin/kexin type 7 (PCSK7), mRNA.                                      |
| 1770070 | SUPT4H1      | -1,3 | 2,1E-02 | Homo sapiens suppressor of Ty 4 homolog 1 (S. cerevisiae) (SUPT4H1), mRNA.                                     |
| 4150639 | RBMS1        | -1,3 | 1,7E-02 | Homo sapiens RNA binding motif, single stranded interacting protein 1 (RBMS1), transcript variant 3, mRNA.     |
| 6200064 | CECR1        | -1,3 | 4,9E-02 | Homo sapiens cat eye syndrome chromosome region, candidate 1 (CECR1), transcript variant 2, mRNA.              |
| 1230224 | DNAJB6       | -1,3 | 4,6E-03 | Homo sapiens DnaJ (Hsp40) homolog, subfamily B, member 6 (DNAJB6), transcript variant 2, mRNA.                 |
| 1510020 | LRCH4        | -1,3 | 1,9E-02 | Homo sapiens leucine-rich repeats and calponin homology (CH) domain containing 4 (LRCH4), mRNA.                |
| 2340671 | MAEA         | -1,3 | 4,8E-02 | Homo sapiens macrophage erythroblast attacher (MAEA), transcript variant 1, mRNA.                              |
| 2470520 | RBMS1        | -1,3 | 2,6E-02 | Homo sapiens RNA binding motif, single stranded interacting protein 1 (RBMS1), transcript variant 3, mRNA.     |
| 2710341 | PRNP         | -1,3 | 4,8E-02 | Homo sapiens prion protein (PRNP), transcript variant 2, mRNA.                                                 |
| 4920328 | SH3KBP1      | -1,3 | 2,9E-02 | Homo sapiens SH3-domain kinase binding protein 1 (SH3KBP1), transcript variant 2, mRNA.                        |
| 5090176 | C9ORF89      | -1,3 | 9,6E-03 | Homo sapiens chromosome 9 open reading frame 89 (C9orf89), mRNA.                                               |
| 2350201 | ANKS1B       | -1,3 | 2,3E-02 | Homo sapiens ankyrin repeat and sterile alpha motif domain containing 1B (ANKS1B), transcript variant 2, mRNA. |
| 3710609 | TSPAN17      | -1,3 | 1,2E-02 | Homo sapiens tetraspanin 17 (TSPAN17), transcript variant 1, mRNA.                                             |
| 3170162 | PRNP         | -1,3 | 4,9E-02 | Homo sapiens prion protein (PRNP), transcript variant 3, mRNA.                                                 |
| 1770386 | MALT1        | -1,3 | 1,9E-02 | Homo sapiens mucosa associated lymphoid tissue lymphoma translocation gene 1 (MALT1), transcript variant 1     |
| 5560544 | HS.551538    | -1,3 | 1,1E-02 | Homo sapiens mRNA: cDNA DKFZp761E1721 (from clone DKFZp761E1721)                                               |
| 2190717 | IL18BP       | -1,3 | 1,4E-03 | Homo sapiens interleukin 18 binding protein (IL18BP), transcript variant A, mRNA.                              |
| 6620026 | CD83         | -1,3 | 2,1E-02 | Homo sapiens CD83 molecule (CD83), transcript variant 1, mRNA.                                                 |
| 7200703 | KAT2B        | -1,3 | 5,0E-02 | Homo sapiens K(lysine) acetyltransferase 2B (KAT2B), mRNA.                                                     |
| 3060646 | C14ORF173    | -1,3 | 1,1E-02 | Homo sapiens chromosome 14 open reading frame 173 (C14orf173), transcript variant 2, mRNA.                     |
| 5810709 | LOC644330    | -1,3 | 3,3E-02 | PREDICTED: Homo sapiens similar to tropomyosin 3 isoform 2 (LOC644330), mRNA.                                  |

|         |           |      |         |                                                                                                           |
|---------|-----------|------|---------|-----------------------------------------------------------------------------------------------------------|
| 1400035 | RCBTB2    | -1,3 | 2,1E-02 | Homo sapiens regulator of chromosome condensation (RCC1) and BTB (POZ) domain containing protein 2        |
| 1430424 | RFFL      | -1,3 | 1,7E-02 | Homo sapiens ring finger and FYVE-like domain containing 1 (RFFL), transcript variant 1, mRNA.            |
| 2060288 | PLP2      | -1,3 | 3,8E-02 | Homo sapiens proteolipid protein 2 (colonic epithelium-enriched) (PLP2), mRNA.                            |
| 3360132 | SNX20     | -1,4 | 1,1E-02 | Homo sapiens sorting nexin 20 (SNX20), mRNA.                                                              |
| 870202  | TNFSF10   | -1,4 | 4,3E-02 | Homo sapiens tumor necrosis factor (ligand) superfamily, member 10 (TNFSF10), mRNA.                       |
| 5720470 | LOC653381 | -1,4 | 2,6E-02 | PREDICTED: Homo sapiens similar to Sorbitol dehydrogenase (L-iditol 2-dehydrogenase) (LOC653381), mRNA.   |
| 6380717 | HSPA1A    | -1,4 | 4,3E-03 | Homo sapiens heat shock 70kDa protein 1A (HSPA1A), mRNA.                                                  |
| 4250753 | TSPAN33   | -1,4 | 8,5E-04 | Homo sapiens tetraspanin 33 (TSPAN33), mRNA.                                                              |
| 1660681 | CCDC102A  | -1,4 | 3,0E-03 | Homo sapiens coiled-coil domain containing 102A (CCDC102A), mRNA.                                         |
| 3850148 | ARHGAP25  | -1,4 | 2,3E-02 | Homo sapiens Rho GTPase activating protein 25 (ARHGAP25), transcript variant 2, mRNA.                     |
| 3170017 | MAP2K3    | -1,4 | 6,4E-04 | Homo sapiens mitogen-activated protein kinase kinase 3 (MAP2K3), transcript variant A, mRNA.              |
| 4290575 | C7ORF23   | -1,4 | 9,5E-04 | Homo sapiens chromosome 7 open reading frame 23 (C7orf23), mRNA.                                          |
| 4150519 | FAM108C1  | -1,4 | 1,2E-03 | Homo sapiens family with sequence similarity 108, member C1 (FAM108C1), mRNA.                             |
| 5700612 | SEPHS1    | -1,4 | 4,9E-02 | Homo sapiens selenophosphate synthetase 1 (SEPHS1), mRNA.                                                 |
| 5690279 | FARS2     | -1,4 | 4,5E-03 | Homo sapiens phenylalanyl-tRNA synthetase 2, mitochondrial, nuclear gene encoding mitochondrial protein   |
| 2450047 | CASZ1     | -1,4 | 4,6E-03 | Homo sapiens castor zinc finger 1 (CASZ1), transcript variant 2, mRNA.                                    |
| 6580408 | CTSW      | -1,4 | 9,5E-03 | Homo sapiens cathepsin W (CTSW), mRNA.                                                                    |
| 2350546 | GPR55     | -1,4 | 8,3E-03 | Homo sapiens G protein-coupled receptor 55 (GPR55), mRNA.                                                 |
| 270338  | TRAT1     | -1,4 | 1,2E-02 | Homo sapiens T cell receptor associated transmembrane adaptor 1 (TRAT1), mRNA.                            |
| 4010433 | LOC650832 | -1,4 | 3,4E-04 | PREDICTED: Homo sapiens similar to mitogen-activated protein kinase kinase 3 isoform A (LOC650832), mRNA. |
| 5340324 | FUT7      | -1,4 | 4,2E-03 | Homo sapiens fucosyltransferase 7 (alpha (1,3) fucosyltransferase) (FUT7), mRNA.                          |
| 4040189 | RIMS3     | -1,4 | 1,9E-03 | Homo sapiens regulating synaptic membrane exocytosis 3 (RIMS3), mRNA.                                     |
| 1340678 | MBP       | -1,4 | 2,7E-03 | Homo sapiens myelin basic protein (MBP), transcript variant 3, mRNA.                                      |
| 5050681 | TESC      | -1,4 | 4,8E-02 | Homo sapiens tescalcin (TESC), mRNA.                                                                      |
| 6280326 | HDC       | -1,4 | 4,6E-02 | Homo sapiens histidine decarboxylase (HDC), mRNA.                                                         |
| 1170673 | TNFSF14   | -1,5 | 4,5E-03 | Homo sapiens tumor necrosis factor (ligand) superfamily, member 14 (TNFSF14), transcript variant 2, mRNA. |
| 110450  | SLC12A9   | -1,5 | 2,7E-02 | Homo sapiens solute carrier family 12 (potassium/chloride transporters), member 9 (SLC12A9), mRNA.        |
| 3370075 | S1PR4     | -1,5 | 1,3E-02 | Homo sapiens sphingosine-1-phosphate receptor 4 (S1PR4), mRNA.                                            |
| 3930019 | IL12RB2   | -1,5 | 3,9E-03 | Homo sapiens interleukin 12 receptor, beta 2 (IL12RB2), mRNA.                                             |
| 4920561 | MB        | -1,5 | 1,0E-02 | Homo sapiens myoglobin (MB), transcript variant 1, mRNA.                                                  |
| 3190379 | TGFBR3    | -1,5 | 1,2E-02 | Homo sapiens transforming growth factor, beta receptor III (TGFBR3), mRNA.                                |
| 1660286 | RILPL2    | -1,5 | 1,5E-04 | Homo sapiens Rab interacting lysosomal protein-like 2 (RILPL2), mRNA.                                     |
| 5860315 | DNAJB6    | -1,5 | 1,1E-03 | Homo sapiens DnaJ (Hsp40) homolog, subfamily B, member 6 (DNAJB6), transcript variant 1, mRNA.            |
| 770538  | LYSMD2    | -1,5 | 1,1E-03 | Homo sapiens LysM, putative peptidoglycan-binding, domain containing 2 (LYSMD2), mRNA.                    |
| 6250192 | COL6A3    | -1,5 | 7,0E-03 | Homo sapiens collagen, type VI, alpha 3 (COL6A3), transcript variant 3, mRNA.                             |
| 770592  | TNFSF14   | -1,5 | 1,1E-03 | Homo sapiens tumor necrosis factor (ligand) superfamily, member 14 (TNFSF14), transcript variant 1, mRNA. |
| 4880626 | GIMAP4    | -1,5 | 7,1E-03 | Homo sapiens GTPase, IMAP family member 4 (GIMAP4), mRNA.                                                 |

|         |          |      |         |                                                                                                           |
|---------|----------|------|---------|-----------------------------------------------------------------------------------------------------------|
| 2940438 | PTGER4   | -1,5 | 6,4E-04 | Homo sapiens prostaglandin E receptor 4 (subtype EP4) (PTGER4), mRNA.                                     |
| 7380670 | MYB      | -1,6 | 2,6E-02 | Homo sapiens v-myb myeloblastosis viral oncogene homolog (avian) (MYB), transcript variant 2, mRNA.       |
| 5220093 | HAVCR2   | -1,6 | 3,4E-02 | Homo sapiens hepatitis A virus cellular receptor 2 (HAVCR2), mRNA.                                        |
| 60470   | STX11    | -1,6 | 2,9E-04 | Homo sapiens syntaxin 11 (STX11), mRNA.                                                                   |
| 830593  | VIM      | -1,6 | 1,1E-03 | Homo sapiens vimentin (VIM), mRNA.                                                                        |
| 7510377 | MSC      | -1,6 | 1,9E-02 | Homo sapiens muscudin (activated B-cell factor-1) (MSC), mRNA.                                            |
| 4780072 | TCEAL3   | -1,6 | 5,8E-05 | Homo sapiens transcription elongation factor A (SII)-like 3 (TCEAL3), transcript variant 1, mRNA.         |
| 5290243 | ATP6V0A4 | -1,6 | 4,3E-02 | Homo sapiens ATPase, H+ transporting, lysosomal V0 subunit a4 (ATP6V0A4), transcript variant 1, mRNA.     |
| 7550307 | PRKCDBP  | -1,6 | 2,7E-02 | Homo sapiens protein kinase C, delta binding protein (PRKCDBP), mRNA.                                     |
| 450553  | AHNAK    | -1,6 | 1,6E-02 | Homo sapiens AHNAK nucleoprotein (AHNAK), transcript variant 1, mRNA.                                     |
| 2630768 | LMNA     | -1,6 | 6,3E-04 | Homo sapiens lamin A/C (LMNA), transcript variant 2, mRNA.                                                |
| 6270553 | CXCL10   | -1,6 | 4,5E-02 | Homo sapiens chemokine (C-X-C motif) ligand 10 (CXCL10), mRNA.                                            |
| 60093   | NCALD    | -1,6 | 3,4E-02 | Homo sapiens neurocalcin delta (NCALD), mRNA.                                                             |
| 6200402 | MT1A     | -1,6 | 4,9E-02 | Homo sapiens metallothionein 1A (MT1A), mRNA.                                                             |
| 3780681 | MBP      | -1,6 | 5,7E-04 | Homo sapiens myelin basic protein (MBP), transcript variant 8, mRNA.                                      |
| 2030142 | CLC      | -1,7 | 3,1E-02 | Homo sapiens Charcot-Leyden crystal protein (CLC), mRNA.                                                  |
| 1980288 | CTSH     | -1,7 | 2,5E-04 | Homo sapiens cathepsin H (CTSH), transcript variant 1, mRNA.                                              |
| 7050019 | VIM      | -1,7 | 1,1E-03 | Homo sapiens vimentin (VIM), mRNA.                                                                        |
| 3990646 | ITPR1    | -1,7 | 8,0E-04 | Homo sapiens inositol 1,4,5-triphosphate receptor, type 1 (ITPR1), transcript variant 2, mRNA.            |
| 2070037 | ICOS     | -1,7 | 1,1E-05 | Homo sapiens inducible T-cell co-stimulator (ICOS), mRNA.                                                 |
| 5270674 | GPR68    | -1,7 | 3,5E-04 | Homo sapiens G protein-coupled receptor 68 (GPR68), mRNA.                                                 |
| 3990458 | S100A4   | -1,7 | 7,6E-05 | Homo sapiens S100 calcium binding protein A4 (S100A4), transcript variant 2, mRNA.                        |
| 610113  | TNFSF14  | -1,7 | 7,6E-04 | Homo sapiens tumor necrosis factor (ligand) superfamily, member 14 (TNFSF14), transcript variant 1, mRNA. |
| 730739  | TCEAL3   | -1,7 | 9,4E-07 | Homo sapiens transcription elongation factor A (SII)-like 3 (TCEAL3), transcript variant 2, mRNA.         |
| 6620392 | LFNG     | -1,8 | 4,4E-05 | Homo sapiens LFNG O-fucosylpeptide 3-beta-N-acetylglucosaminyltransferase (LFNG), transcript variant 1    |
| 450615  | MT2A     | -1,9 | 4,9E-02 | Homo sapiens metallothionein 2A (MT2A), mRNA.                                                             |
| 3180053 | FAM129B  | -2,0 | 8,1E-05 | Homo sapiens family with sequence similarity 129, member B (FAM129B), transcript variant 1, mRNA.         |
| 6040332 | IL3      | -2,0 | 8,1E-03 | Homo sapiens interleukin 3 (colony-stimulating factor, multiple) (IL3), mRNA.                             |
| 6420450 | LIME1    | -2,1 | 9,2E-05 | Homo sapiens Lck interacting transmembrane adaptor 1 (LIME1), mRNA.                                       |
| 3830349 | IL7R     | -2,1 | 1,6E-07 | Homo sapiens interleukin 7 receptor (IL7R), mRNA.                                                         |
| 5290270 | S100A4   | -2,1 | 1,4E-06 | Homo sapiens S100 calcium binding protein A4 (S100A4), transcript variant 2, mRNA.                        |
| 7050719 | C1ORF162 | -2,1 | 4,7E-06 | Homo sapiens chromosome 1 open reading frame 162 (C1orf162), mRNA.                                        |
| 3890523 | IL7R     | -2,2 | 1,6E-05 | PREDICTED: Homo sapiens interleukin 7 receptor (IL7R), mRNA.                                              |
| 6020424 | LMNA     | -2,3 | 1,5E-04 | Homo sapiens lamin A/C (LMNA), transcript variant 2, mRNA.                                                |
| 7560593 | OSM      | -2,3 | 2,9E-02 | Homo sapiens oncostatin M (OSM), mRNA.                                                                    |
| 6940358 | SELL     | -3,0 | 4,6E-07 | Homo sapiens selectin L (SELL), mRNA.                                                                     |

| <b>Supplemental Table 4: Transcripts differentially expressed by CCR6+ versus CCR6- T-cells upon TCR triggering in the presence of ATRA</b> |               |                    |                  |                                                                                                            |
|---------------------------------------------------------------------------------------------------------------------------------------------|---------------|--------------------|------------------|------------------------------------------------------------------------------------------------------------|
| <b>ProbeID</b>                                                                                                                              | <b>SYMBOL</b> | <b>Fold Change</b> | <b>adj.P.Val</b> | <b>Definition</b>                                                                                          |
| 4220246                                                                                                                                     | CCL20         | 8,7                | 5,1E-12          | Homo sapiens chemokine (C-C motif) ligand 20 (CCL20), mRNA.                                                |
| 5360682                                                                                                                                     | IL17F         | 8,2                | 2,9E-04          | Homo sapiens interleukin 17F (IL17F), mRNA.                                                                |
| 1980288                                                                                                                                     | CTSH          | 6,9                | 9,9E-16          | Homo sapiens cathepsin H (CTSH), transcript variant 1, mRNA.                                               |
| 730753                                                                                                                                      | IL22          | 6,2                | 8,7E-08          | Homo sapiens interleukin 22 (IL22), mRNA.                                                                  |
| 6200019                                                                                                                                     | KLRB1         | 5,9                | 2,9E-07          | Homo sapiens killer cell lectin-like receptor subfamily B, member 1 (KLRB1), mRNA.                         |
| 5360064                                                                                                                                     | GPLY          | 4,0                | 1,0E-05          | Homo sapiens granulysin (GPLY), transcript variant 519, mRNA.                                              |
| 6590332                                                                                                                                     | IL22          | 4,0                | 3,7E-06          | Homo sapiens interleukin 22 (IL22), mRNA.                                                                  |
| 4670162                                                                                                                                     | CTSH          | 3,5                | 4,8E-12          | Homo sapiens cathepsin H (CTSH), transcript variant 1, mRNA.                                               |
| 6580041                                                                                                                                     | GPLY          | 3,2                | 1,2E-04          | Homo sapiens granulysin (GPLY), transcript variant NKG5, mRNA.                                             |
| 2750196                                                                                                                                     | CSF2          | 3,1                | 1,2E-04          | Homo sapiens colony stimulating factor 2 (granulocyte-macrophage) (CSF2), mRNA.                            |
| 540670                                                                                                                                      | IL4I1         | 2,9                | 8,7E-08          | Homo sapiens interleukin 4 induced 1 (IL4I1), transcript variant 2, mRNA.                                  |
| 10685                                                                                                                                       | ANTXR2        | 2,8                | 6,2E-08          | Homo sapiens anthrax toxin receptor 2 (ANTXR2), mRNA.                                                      |
| 4890241                                                                                                                                     | GPR56         | 2,7                | 3,3E-04          | Homo sapiens G protein-coupled receptor 56 (GPR56), transcript variant 2, mRNA.                            |
| 6550333                                                                                                                                     | CXCR6         | 2,5                | 2,3E-05          | Homo sapiens chemokine (C-X-C motif) receptor 6 (CXCR6), mRNA.                                             |
| 5490768                                                                                                                                     | GPR56         | 2,4                | 1,1E-03          | Homo sapiens G protein-coupled receptor 56 (GPR56), transcript variant 3, mRNA.                            |
| 3850692                                                                                                                                     | KLF2          | 2,4                | 2,5E-03          | Homo sapiens Kruppel-like factor 2 (lung) (KLF2), mRNA.                                                    |
| 4070091                                                                                                                                     | RORC          | 2,3                | 1,7E-06          | Homo sapiens RAR-related orphan receptor C (RORC), transcript variant 2, mRNA.                             |
| 5860093                                                                                                                                     | NLF2          | 2,2                | 8,6E-05          | PREDICTED: Homo sapiens nuclear localized factor 2 (NLF2), mRNA.                                           |
| 6480630                                                                                                                                     | ATP9A         | 2,2                | 4,1E-05          | Homo sapiens ATPase, class II, type 9A (ATP9A), mRNA.                                                      |
| 7050019                                                                                                                                     | VIM           | 2,2                | 2,1E-06          | Homo sapiens vimentin (VIM), mRNA.                                                                         |
| 1110180                                                                                                                                     | RORA          | 2,2                | 7,5E-04          | Homo sapiens RAR-related orphan receptor A (RORA), transcript variant 3, mRNA.                             |
| 5420091                                                                                                                                     | LTB           | 2,2                | 2,2E-05          | Homo sapiens lymphotoxin beta (TNF superfamily, member 3) (LTB), transcript variant 1, mRNA.               |
| 7380273                                                                                                                                     | GPR114        | 2,2                | 4,1E-06          | Homo sapiens G protein-coupled receptor 114 (GPR114), mRNA.                                                |
| 6040711                                                                                                                                     | CCR2          | 2,1                | 1,9E-06          | Homo sapiens chemokine (C-C motif) receptor 2 (CCR2), transcript variant A, mRNA.                          |
| 580706                                                                                                                                      | CCR2          | 2,1                | 4,1E-06          | Homo sapiens chemokine (C-C motif) receptor 2 (CCR2), transcript variant A, mRNA.                          |
| 5310053                                                                                                                                     | LTB           | 2,1                | 3,7E-05          | Homo sapiens lymphotoxin beta (TNF superfamily, member 3) (LTB), transcript variant 1, mRNA.               |
| 5290270                                                                                                                                     | S100A4        | 2,1                | 6,9E-07          | Homo sapiens S100 calcium binding protein A4 (S100A4), transcript variant 2, mRNA.                         |
| 610332                                                                                                                                      | CHN1          | 2,1                | 4,3E-06          | Homo sapiens chimerin (chimaerin) 1 (CHN1), transcript variant 2, mRNA.                                    |
| 6220746                                                                                                                                     | GLIPR1        | 2,0                | 3,2E-05          | Homo sapiens GLI pathogenesis-related 1 (GLIPR1), mRNA.                                                    |
| 2970575                                                                                                                                     | CCL4L2        | 2,0                | 1,2E-02          | Homo sapiens chemokine (C-C motif) ligand 4-like 2 (CCL4L2), mRNA.                                         |
| 520066                                                                                                                                      | TNFRSF18      | 2,0                | 6,0E-03          | Homo sapiens tumor necrosis factor receptor superfamily, member 18 (TNFRSF18), transcript variant 3, mRNA. |
| 630725                                                                                                                                      | IFNG          | 2,0                | 9,4E-03          | Homo sapiens interferon, gamma (IFNG), mRNA.                                                               |
| 6760037                                                                                                                                     | SYTL2         | 2,0                | 3,2E-05          | Homo sapiens synaptotagmin-like 2 (SYTL2), transcript variant e, mRNA.                                     |
| 6560201                                                                                                                                     | LOC728835     | 2,0                | 3,7E-02          | PREDICTED: Homo sapiens similar to cytokine, transcript variant 3 (LOC728835), mRNA.                       |
| 5890470                                                                                                                                     | CCR6          | 2,0                | 4,4E-04          | Homo sapiens chemokine (C-C motif) receptor 6 (CCR6), transcript variant 2, mRNA.                          |

|         |           |     |         |                                                                                                            |
|---------|-----------|-----|---------|------------------------------------------------------------------------------------------------------------|
| 7200703 | KAT2B     | 2,0 | 1,7E-06 | Homo sapiens K(lysine) acetyltransferase 2B (KAT2B), mRNA.                                                 |
| 840386  | TNFRSF18  | 2,0 | 1,3E-02 | Homo sapiens tumor necrosis factor receptor superfamily, member 18 (TNFRSF18), transcript variant 2, mRNA. |
| 830593  | VIM       | 2,0 | 2,5E-06 | Homo sapiens vimentin (VIM), mRNA.                                                                         |
| 1570484 | ATF5      | 2,0 | 5,3E-04 | Homo sapiens activating transcription factor 5 (ATF5), mRNA.                                               |
| 4890553 | RORC      | 2,0 | 1,7E-06 | Homo sapiens RAR-related orphan receptor C (RORC), transcript variant 2, mRNA.                             |
| 5570114 | GADD45G   | 1,9 | 1,4E-05 | Homo sapiens growth arrest and DNA-damage-inducible, gamma (GADD45G), mRNA.                                |
| 3990458 | S100A4    | 1,9 | 2,5E-06 | Homo sapiens S100 calcium binding protein A4 (S100A4), transcript variant 2, mRNA.                         |
| 7210450 | LMO4      | 1,9 | 6,8E-06 | Homo sapiens LIM domain only 4 (LMO4), mRNA.                                                               |
| 3800019 | NCR3      | 1,9 | 1,3E-04 | Homo sapiens natural cytotoxicity triggering receptor 3 (NCR3), mRNA.                                      |
| 7320731 | MAP3K4    | 1,9 | 7,9E-05 | Homo sapiens mitogen-activated protein kinase kinase kinase 4 (MAP3K4), transcript variant 1, mRNA.        |
| 6400564 | HS.560343 | 1,9 | 1,3E-03 | Homo sapiens mRNA; cDNA DKFZp686M2414 (from clone DKFZp686M2414)                                           |
| 2710754 | CD96      | 1,9 | 1,4E-03 | Homo sapiens CD96 molecule (CD96), transcript variant 1, mRNA.                                             |
| 520553  | NCALD     | 1,9 | 2,0E-03 | Homo sapiens neurocalcin delta (NCALD), transcript variant 3, mRNA.                                        |
| 70551   | IQCG      | 1,9 | 1,0E-02 | Homo sapiens IQ motif containing G (IQCG), mRNA.                                                           |
| 4560743 | CD96      | 1,9 | 1,2E-03 | Homo sapiens CD96 molecule (CD96), transcript variant 2, mRNA.                                             |
| 4670193 | PRF1      | 1,9 | 6,1E-04 | Homo sapiens perforin 1 (pore forming protein) (PRF1), transcript variant 1, mRNA.                         |
| 4810020 | PLEK      | 1,9 | 7,9E-04 | Homo sapiens pleckstrin (PLEK), mRNA.                                                                      |
| 7510377 | MSC       | 1,9 | 4,3E-04 | Homo sapiens musculin (activated B-cell factor-1) (MSC), mRNA.                                             |
| 60093   | NCALD     | 1,8 | 2,5E-03 | Homo sapiens neurocalcin delta (NCALD), mRNA.                                                              |
| 450553  | AHNAK     | 1,8 | 5,7E-04 | Homo sapiens AHNAK nucleoprotein (AHNAK), transcript variant 1, mRNA.                                      |
| 5910523 | LMO4      | 1,8 | 3,1E-06 | Homo sapiens LIM domain only 4 (LMO4), mRNA.                                                               |
| 7330538 | PYHIN1    | 1,8 | 2,8E-05 | Homo sapiens pyrin and HIN domain family, member 1 (PYHIN1), transcript variant a1, mRNA.                  |
| 3850021 | CASP4     | 1,8 | 2,8E-05 | Homo sapiens caspase 4, apoptosis-related cysteine peptidase (CASP4), transcript variant alpha, mRNA.      |
| 4490673 | TWIST1    | 1,8 | 2,4E-04 | Homo sapiens twist homolog 1 (Drosophila) (TWIST1), mRNA.                                                  |
| 5290678 | FLJ20021  | 1,8 | 9,0E-04 | PREDICTED: Homo sapiens hypothetical LOC90024 (FLJ20021), mRNA.                                            |
| 7380255 | ARAP3     | 1,8 | 4,1E-05 | Homo sapiens ArfGAP with RhoGAP domain, ankyrin repeat and PH domain 3 (ARAP3), mRNA.                      |
| 6550008 | IL26      | 1,8 | 5,3E-04 | Homo sapiens interleukin 26 (IL26), mRNA.                                                                  |
| 4220068 | CD70      | 1,8 | 1,9E-05 | Homo sapiens CD70 molecule (CD70), mRNA.                                                                   |
| 1450193 | LGALS1    | 1,8 | 2,2E-03 | Homo sapiens lectin, galactoside-binding, soluble, 1 (LGALS1), mRNA.                                       |
| 3870706 | FURIN     | 1,8 | 8,6E-05 | Homo sapiens furin (paired basic amino acid cleaving enzyme) (FURIN), mRNA.                                |
| 270338  | TRAT1     | 1,7 | 3,2E-05 | Homo sapiens T cell receptor associated transmembrane adaptor 1 (TRAT1), mRNA.                             |
| 1230048 | ABCB1     | 1,7 | 4,3E-06 | Homo sapiens ATP-binding cassette, sub-family B (MDR/TAP), member 1 (ABCB1), mRNA.                         |
| 7550112 | CITED2    | 1,7 | 1,9E-05 | Homo sapiens Cbp/p300-interacting transactivator, with Glu/Asp-rich carboxy-terminal domain, 2 (CITED2)    |
| 3310142 | TTC39C    | 1,7 | 7,9E-05 | Homo sapiens tetratricopeptide repeat domain 39C (TTC39C), mRNA.                                           |
| 1440437 | LOC151162 | 1,7 | 6,9E-07 | Homo sapiens hypothetical LOC151162 (LOC151162), non-coding RNA.                                           |
| 6520180 | IL18RAP   | 1,7 | 2,4E-02 | Homo sapiens interleukin 18 receptor accessory protein (IL18RAP), mRNA.                                    |
| 620717  | CCL5      | 1,7 | 2,7E-02 | Homo sapiens chemokine (C-C motif) ligand 5 (CCL5), mRNA.                                                  |

|         |           |     |         |                                                                                                             |
|---------|-----------|-----|---------|-------------------------------------------------------------------------------------------------------------|
| 1510364 | GBP5      | 1,7 | 1,5E-03 | Homo sapiens guanylate binding protein 5 (GBP5), mRNA.                                                      |
| 4490176 | RGS1      | 1,7 | 4,8E-02 | Homo sapiens regulator of G-protein signaling 1 (RGS1), mRNA.                                               |
| 7150519 | ARNTL     | 1,7 | 5,2E-04 | Homo sapiens aryl hydrocarbon receptor nuclear translocator-like (ARNTL), transcript variant 2, mRNA.       |
| 6510608 | BTBD11    | 1,7 | 9,0E-04 | Homo sapiens BTB (POZ) domain containing 11 (BTBD11), transcript variant 1, mRNA.                           |
| 3370053 | HS.567469 | 1,7 | 1,6E-03 | Homo sapiens T cell receptor beta variable 21-1, mRNA (cDNA clone MGC:46491 IMAGE:5225843), complete cds    |
| 5490240 | MAP1LC3A  | 1,7 | 8,4E-03 | Homo sapiens microtubule-associated protein 1 light chain 3 alpha (MAP1LC3A), transcript variant 2, mRNA.   |
| 3710647 | MXD4      | 1,7 | 2,6E-02 | Homo sapiens MAX dimerization protein 4 (MXD4), mRNA.                                                       |
| 5900594 | CD58      | 1,7 | 4,3E-05 | Homo sapiens CD58 molecule (CD58), mRNA.                                                                    |
| 1230201 | CTLA4     | 1,7 | 1,3E-02 | Homo sapiens cytotoxic T-lymphocyte-associated protein 4 (CTLA4), transcript variant 1, mRNA.               |
| 3370768 | C1ORF24   | 1,7 | 8,0E-04 | Homo sapiens chromosome 1 open reading frame 24 (C1orf24), transcript variant 2, mRNA.                      |
| 6480692 | NCF4      | 1,7 | 6,0E-05 | Homo sapiens neutrophil cytosolic factor 4, 40kDa (NCF4), transcript variant 1, mRNA.                       |
| 5900725 | PHLDA1    | 1,7 | 3,1E-03 | Homo sapiens pleckstrin homology-like domain, family A, member 1 (PHLDA1), mRNA.                            |
| 5050402 | HIST1H2BK | 1,7 | 1,8E-02 | Homo sapiens histone cluster 1, H2bk (HIST1H2BK), mRNA.                                                     |
| 3850246 | HOPX      | 1,7 | 1,9E-02 | Homo sapiens HOP homeobox (HOPX), transcript variant 3, mRNA.                                               |
| 990719  | HS.579530 | 1,6 | 1,1E-03 | AGENCOURT_14354957 NIH_MGC_191 Homo sapiens cDNA clone IMAGE:30413554 5, mRNA sequence                      |
| 2230367 | CERK      | 1,6 | 2,8E-05 | Homo sapiens ceramide kinase (CERK), transcript variant 1, mRNA.                                            |
| 3610035 | CD58      | 1,6 | 1,9E-05 | Homo sapiens CD58 molecule (CD58), mRNA.                                                                    |
| 4570398 | F2R       | 1,6 | 8,5E-05 | Homo sapiens coagulation factor II (thrombin) receptor (F2R), mRNA.                                         |
| 670528  | GYG1      | 1,6 | 5,0E-04 | Homo sapiens glycogenin 1 (GYG1), mRNA.                                                                     |
| 5420377 | LGALS3    | 1,6 | 5,5E-04 | Homo sapiens lectin, galactoside-binding, soluble, 3 (galectin 3) (LGALS3), mRNA.                           |
| 4050671 | GNG4      | 1,6 | 1,6E-02 | Homo sapiens guanine nucleotide binding protein (G protein), gamma 4 (GNG4), transcript variant 2, mRNA.    |
| 3290458 | FEZ1      | 1,6 | 8,2E-04 | Homo sapiens fasciculation and elongation protein zeta 1 (zygin I) (FEZ1), transcript variant 1, mRNA.      |
| 630161  | RCAN2     | 1,6 | 2,0E-02 | Homo sapiens regulator of calcineurin 2 (RCAN2), mRNA.                                                      |
| 4900747 | C11ORF75  | 1,6 | 6,7E-06 | Homo sapiens chromosome 11 open reading frame 75 (C11orf75), mRNA.                                          |
| 6510689 | HABP4     | 1,6 | 3,3E-05 | Homo sapiens hyaluronan binding protein 4 (HABP4), mRNA.                                                    |
| 5960239 | CCR2      | 1,6 | 2,3E-05 | Homo sapiens chemokine (C-C motif) receptor 2 (CCR2), transcript variant B, mRNA.                           |
| 4250008 | ATM       | 1,6 | 4,3E-03 | Homo sapiens ataxia telangiectasia mutated (ATM), transcript variant 1, mRNA.                               |
| 6860687 | PYCARD    | 1,6 | 2,2E-05 | Homo sapiens PYD and CARD domain containing (PYCARD), transcript variant 1, mRNA.                           |
| 6220288 | PRDM1     | 1,6 | 9,0E-04 | Homo sapiens PR domain containing 1, with ZNF domain (PRDM1), transcript variant 1, mRNA.                   |
| 6400370 | IL12RB1   | 1,6 | 5,8E-05 | Homo sapiens interleukin 12 receptor, beta 1 (IL12RB1), transcript variant 2, mRNA.                         |
| 60470   | STX11     | 1,6 | 5,8E-05 | Homo sapiens syntaxin 11 (STX11), mRNA.                                                                     |
| 3990224 | TNFRSF25  | 1,6 | 1,1E-03 | Homo sapiens tumor necrosis factor receptor superfamily, member 25 (TNFRSF25), transcript variant 10, mRNA. |
| 5290040 | TNFRSF4   | 1,6 | 2,1E-02 | Homo sapiens tumor necrosis factor receptor superfamily, member 4 (TNFRSF4), mRNA.                          |
| 4780615 | ANXA2     | 1,6 | 8,4E-03 | Homo sapiens annexin A2 (ANXA2), transcript variant 1, mRNA.                                                |
| 10332   | HIPK2     | 1,6 | 1,5E-04 | Homo sapiens homeodomain interacting protein kinase 2 (HIPK2), mRNA.                                        |
| 7050711 | LYST      | 1,6 | 1,7E-04 | Homo sapiens lysosomal trafficking regulator (LYST), transcript variant 2, mRNA.                            |
| 5690347 | TPST2     | 1,6 | 1,1E-05 | Homo sapiens tyrosylprotein sulfotransferase 2 (TPST2), transcript variant 1, mRNA.                         |

|         |           |     |         |                                                                                                             |
|---------|-----------|-----|---------|-------------------------------------------------------------------------------------------------------------|
| 160292  | APOBEC3H  | 1,6 | 3,6E-02 | Homo sapiens apolipoprotein B mRNA editing enzyme, catalytic polypeptide-like 3H (APOBEC3H), mRNA.          |
| 3520327 | LOC642161 | 1,6 | 2,0E-03 | PREDICTED: Homo sapiens similar to T-cell receptor beta chain V region CTL-L17 precursor (LOC642161), mRNA. |
| 4210397 | GLDC      | 1,6 | 8,7E-03 | Homo sapiens glycine dehydrogenase (decarboxylating) (GLDC), mRNA.                                          |
| 770538  | LYSMD2    | 1,6 | 1,1E-04 | Homo sapiens LysM, putative peptidoglycan-binding, domain containing 2 (LYSMD2), mRNA.                      |
| 1580520 | PTPN13    | 1,6 | 6,0E-05 | Homo sapiens protein tyrosine phosphatase, non-receptor type 13 (APO-1/CD95 (Fas)-associated phosphatase)   |
| 3060692 | CERK      | 1,6 | 2,8E-04 | Homo sapiens ceramide kinase (CERK), transcript variant 2, mRNA.                                            |
| 1980750 | APOL3     | 1,6 | 6,2E-05 | Homo sapiens apolipoprotein L, 3 (APOL3), transcript variant beta/a, mRNA.                                  |
| 830735  | CENTA1    | 1,6 | 1,0E-03 | Homo sapiens centaurin, alpha 1 (CENTA1), mRNA.                                                             |
| 5860356 | PTPRM     | 1,6 | 9,4E-04 | Homo sapiens protein tyrosine phosphatase, receptor type, M (PTPRM), mRNA.                                  |
| 2900427 | P2RX5     | 1,6 | 2,1E-03 | Homo sapiens purinergic receptor P2X, ligand-gated ion channel, 5 (P2RX5), transcript variant 2, mRNA.      |
| 7050152 | EVI2B     | 1,6 | 1,4E-02 | Homo sapiens ecotropic viral integration site 2B (EVI2B), mRNA.                                             |
| 3890138 | MTMR11    | 1,6 | 2,1E-02 | Homo sapiens myotubularin related protein 11 (MTMR11), mRNA.                                                |
| 5860204 | FKBP11    | 1,6 | 2,3E-04 | Homo sapiens FK506 binding protein 11, 19 kDa (FKBP11), mRNA.                                               |
| 5360736 | HABP4     | 1,6 | 1,1E-04 | Homo sapiens hyaluronan binding protein 4 (HABP4), mRNA.                                                    |
| 7000270 | PYHIN1    | 1,6 | 6,4E-04 | Homo sapiens pyrin and HIN domain family, member 1 (PYHIN1), transcript variant b2, mRNA.                   |
| 7570408 | CCL5      | 1,6 | 2,5E-02 | Homo sapiens chemokine (C-C motif) ligand 5 (CCL5), mRNA.                                                   |
| 1470762 | AUTS2     | 1,6 | 2,9E-05 | Homo sapiens autism susceptibility candidate 2 (AUTS2), mRNA.                                               |
| 4120369 | APOBEC3G  | 1,6 | 1,1E-03 | Homo sapiens apolipoprotein B mRNA editing enzyme, catalytic polypeptide-like 3G (APOBEC3G), mRNA.          |
| 3140088 | IL23R     | 1,6 | 3,2E-04 | Homo sapiens interleukin 23 receptor (IL23R), mRNA.                                                         |
| 4230735 | FAM129A   | 1,6 | 8,0E-04 | Homo sapiens family with sequence similarity 129, member A (FAM129A), transcript variant 2, mRNA.           |
| 6100482 | ATP2B4    | 1,6 | 5,7E-04 | Homo sapiens ATPase, Ca <sup>++</sup> transporting, plasma membrane 4 (ATP2B4), transcript variant 1, mRNA. |
| 1410181 | SAMSN1    | 1,5 | 9,3E-04 | Homo sapiens SAM domain, SH3 domain and nuclear localization signals 1 (SAMSN1), mRNA.                      |
| 2490537 | TNFRSF1B  | 1,5 | 2,5E-05 | Homo sapiens tumor necrosis factor receptor superfamily, member 1B (TNFRSF1B), mRNA.                        |
| 3180053 | FAM129B   | 1,5 | 4,9E-03 | Homo sapiens family with sequence similarity 129, member B (FAM129B), transcript variant 1, mRNA.           |
| 3390386 | HS.567472 | 1,5 | 1,1E-03 | BX400436 Homo sapiens T CELLS (JURKAT CELL LINE) COT 10-NORMALIZED                                          |
| 7400133 | CUGBP2    | 1,5 | 4,1E-05 | Homo sapiens CUG triplet repeat, RNA binding protein 2 (CUGBP2), transcript variant 3, mRNA.                |
| 7380100 | MCL1      | 1,5 | 1,8E-03 | Homo sapiens myeloid cell leukemia sequence 1 (BCL2-related) (MCL1), transcript variant 1, mRNA.            |
| 460164  | FTHL11    | 1,5 | 2,8E-02 | Homo sapiens ferritin, heavy polypeptide-like 11 (FTHL11) on chromosome 8.                                  |
| 6620392 | LFNG      | 1,5 | 5,1E-04 | Homo sapiens LFNG O-fucosylpeptide 3-beta-N-acetylglucosaminyltransferase (LFNG), transcript variant 1      |
| 1240593 | CFLAR     | 1,5 | 5,0E-03 | Homo sapiens CASP8 and FADD-like apoptosis regulator (CFLAR), mRNA.                                         |
| 2680543 | PDE4B     | 1,5 | 2,0E-04 | Homo sapiens phosphodiesterase 4B, cAMP-specific (phosphodiesterase E4 dunce homolog, Drosophila)           |
| 5220240 | FTH1      | 1,5 | 1,9E-03 | Homo sapiens ferritin, heavy polypeptide 1 (FTH1), mRNA.                                                    |
| 1430653 | MTX3      | 1,5 | 3,8E-03 | Homo sapiens metaxin 3 (MTX3), mRNA.                                                                        |
| 4150189 | CTSL1     | 1,5 | 3,1E-02 | Homo sapiens cathepsin L1 (CTSL1), transcript variant 1, mRNA.                                              |
| 6220671 | PLAUR     | 1,5 | 4,3E-02 | Homo sapiens plasminogen activator, urokinase receptor (PLAUR), transcript variant 2, mRNA.                 |
| 7650121 | HS.495041 | 1,5 | 1,8E-03 | zu50f04.r1 Soares ovary tumor NbHOT Homo sapiens cDNA clone IMAGE:741439 5                                  |
| 6900630 | ATP2B4    | 1,5 | 2,3E-04 | Homo sapiens ATPase, Ca <sup>++</sup> transporting, plasma membrane 4 (ATP2B4), transcript variant 2, mRNA. |



|         |              |     |         |                                                                                                             |
|---------|--------------|-----|---------|-------------------------------------------------------------------------------------------------------------|
| 5260403 | ST3GAL5      | 1,5 | 4,3E-04 | Homo sapiens ST3 beta-galactoside alpha-2,3-sialyltransferase 5 (ST3GAL5), transcript variant 2, mRNA.      |
| 1070451 | ANXA5        | 1,5 | 6,4E-06 | Homo sapiens annexin A5 (ANXA5), mRNA.                                                                      |
| 7150608 | CXORF40B     | 1,5 | 2,1E-04 | Homo sapiens chromosome X open reading frame 40B (CXorf40B), mRNA.                                          |
| 1780619 | EHD1         | 1,5 | 1,2E-03 | Homo sapiens EH-domain containing 1 (EHD1), mRNA.                                                           |
| 7210253 | LOC730415    | 1,5 | 3,6E-02 | PREDICTED: Homo sapiens hypothetical LOC730415, transcript variant 2 (LOC730415), mRNA.                     |
| 6380717 | HSPA1A       | 1,5 | 9,6E-05 | Homo sapiens heat shock 70kDa protein 1A (HSPA1A), mRNA.                                                    |
| 2760544 | PBX4         | 1,5 | 3,8E-02 | Homo sapiens pre-B-cell leukemia homeobox 4 (PBX4), mRNA.                                                   |
| 2480577 | PDE4B        | 1,5 | 1,3E-04 | Homo sapiens phosphodiesterase 4B, cAMP-specific (phosphodiesterase E4 dunce homolog, Drosophila)           |
| 4390300 | TOB1         | 1,5 | 7,9E-04 | Homo sapiens transducer of ERBB2, 1 (TOB1), mRNA.                                                           |
| 2760500 | CD38         | 1,5 | 1,2E-03 | Homo sapiens CD38 molecule (CD38), mRNA.                                                                    |
| 4760056 | ELOVL4       | 1,5 | 3,7E-06 | Homo sapiens elongation of very long chain fatty acids (FEN1/Elo2, SUR4/Elo3, yeast)-like 4 (ELOVL4), mRNA. |
| 730528  | PLAUR        | 1,5 | 3,2E-03 | Homo sapiens plasminogen activator, urokinase receptor (PLAUR), transcript variant 1, mRNA.                 |
| 4010397 | PLEKHG3      | 1,5 | 4,8E-04 | Homo sapiens pleckstrin homology domain containing, family G (with RhoGef domain) member 3 (PLEKHG3)        |
| 4120689 | FES          | 1,5 | 2,2E-02 | Homo sapiens feline sarcoma oncogene (FES), mRNA.                                                           |
| 270068  | SMOX         | 1,5 | 1,8E-02 | Homo sapiens spermine oxidase (SMOX), transcript variant 4, mRNA.                                           |
| 5870326 | SLC2A8       | 1,5 | 1,9E-02 | Homo sapiens solute carrier family 2 (facilitated glucose transporter), member 8 (SLC2A8), mRNA.            |
| 6020523 | PPP2R2B      | 1,5 | 3,2E-03 | Homo sapiens protein phosphatase 2 (formerly 2A), regulatory subunit B, beta isoform (PPP2R2B)              |
| 4540086 | LOC100129066 | 1,5 | 1,6E-03 | Homo sapiens hypothetical LOC100129066 (LOC100129066), non-coding RNA                                       |
| 7040431 | PRDM8        | 1,5 | 4,2E-04 | Homo sapiens PR domain containing 8 (PRDM8), transcript variant 1, mRNA.                                    |
| 4570612 | FASLG        | 1,5 | 2,2E-02 | Homo sapiens Fas ligand (TNF superfamily, member 6) (FASLG), mRNA.                                          |
| 1030463 | PROK2        | 1,5 | 1,3E-02 | Homo sapiens prokineticin 2 (PROK2), mRNA.                                                                  |
| 6370082 | HS.126245    | 1,5 | 3,9E-04 | CR743148 NCI_CGAP_GC4 Homo sapiens cDNA clone IMAGp971L0563 ; IMAGE:1550800 5, mRNA sequence                |
| 2640301 | TNF          | 1,5 | 8,4E-03 | Homo sapiens tumor necrosis factor (TNF superfamily, member 2) (TNF), mRNA.                                 |
| 2060477 | AGPAT9       | 1,5 | 4,8E-04 | Homo sapiens 1-acylglycerol-3-phosphate O-acyltransferase 9 (AGPAT9), mRNA.                                 |
| 1090292 | BMI1         | 1,5 | 5,2E-04 | Homo sapiens BMI1 polycomb ring finger oncogene (BMI1), mRNA.                                               |
| 770730  | ANXA2        | 1,5 | 3,4E-02 | Homo sapiens annexin A2 (ANXA2), transcript variant 2, mRNA.                                                |
| 1190026 | APOBEC3G     | 1,5 | 6,9E-03 | Homo sapiens apolipoprotein B mRNA editing enzyme, catalytic polypeptide-like 3G (APOBEC3G), mRNA.          |
| 4200369 | LOC642233    | 1,5 | 1,3E-02 | PREDICTED: Homo sapiens hypothetical protein LOC642233 (LOC642233), mRNA.                                   |
| 4670615 | LOC644846    | 1,5 | 1,8E-02 | PREDICTED: Homo sapiens hypothetical protein LOC644846 (LOC644846), mRNA.                                   |
| 4730739 | RPS6KA1      | 1,5 | 2,9E-05 | Homo sapiens ribosomal protein S6 kinase, 90kDa, polypeptide 1 (RPS6KA1), transcript variant 1, mRNA.       |
| 940504  | RUNX2        | 1,5 | 4,8E-02 | Homo sapiens runt-related transcription factor 2 (RUNX2), transcript variant 1, mRNA.                       |
| 3060609 | PTPN13       | 1,5 | 7,1E-05 | Homo sapiens protein tyrosine phosphatase, non-receptor type 13 (APO-1/CD95 (Fas)-associated phosphatase)   |
| 2630017 | TPST2        | 1,5 | 6,4E-05 | Homo sapiens tyrosylprotein sulfotransferase 2 (TPST2), transcript variant 1, mRNA.                         |
| 130274  | LCK          | 1,5 | 1,9E-03 | Homo sapiens lymphocyte-specific protein tyrosine kinase (LCK), transcript variant 2, mRNA.                 |
| 2070037 | ICOS         | 1,5 | 5,0E-04 | Homo sapiens inducible T-cell co-stimulator (ICOS), mRNA.                                                   |
| 1070544 | EFHD2        | 1,5 | 1,7E-03 | Homo sapiens EF-hand domain family, member D2 (EFHD2), mRNA.                                                |
| 1190039 | HLA-DPA1     | 1,5 | 1,3E-02 | Homo sapiens major histocompatibility complex, class II, DP alpha 1 (HLA-DPA1), mRNA.                       |

|         |           |     |         |                                                                                                             |
|---------|-----------|-----|---------|-------------------------------------------------------------------------------------------------------------|
| 2640768 | CTSC      | 1,5 | 7,0E-04 | Homo sapiens cathepsin C (CTSC), transcript variant 1, mRNA.                                                |
| 2000224 | FAM89B    | 1,5 | 4,5E-03 | Homo sapiens family with sequence similarity 89, member B (FAM89B), transcript variant 3, mRNA.             |
| 2000451 | PYHIN1    | 1,5 | 9,5E-05 | Homo sapiens pyrin and HIN domain family, member 1 (PYHIN1), transcript variant b2, mRNA.                   |
| 3940703 | RORA      | 1,5 | 9,1E-04 | Homo sapiens RAR-related orphan receptor A (RORA), transcript variant 3, mRNA.                              |
| 4150639 | RBMS1     | 1,5 | 2,3E-04 | Homo sapiens RNA binding motif, single stranded interacting protein 1 (RBMS1), transcript variant 3, mRNA.  |
| 5870164 | SLA       | 1,5 | 1,0E-02 | Homo sapiens Src-like-adaptor (SLA), transcript variant 2, mRNA.                                            |
| 2120746 | HS.547738 | 1,5 | 4,5E-03 | EST10086 human nasopharynx Homo sapiens cDNA, mRNA sequence                                                 |
| 3930537 | HS.567464 | 1,5 | 1,0E-02 | Human T-cell receptor (V beta 4.1-variant, J beta 2.1, C beta 2) mRNA                                       |
| 360475  | PLAUR     | 1,5 | 2,0E-02 | Homo sapiens plasminogen activator, urokinase receptor (PLAUR), transcript variant 2, mRNA.                 |
| 1980672 | IL1A      | 1,4 | 4,7E-02 | Homo sapiens interleukin 1, alpha (IL1A), mRNA.                                                             |
| 4860280 | HS.37648  | 1,4 | 2,4E-04 | Homo sapiens cDNA FLJ31407 fis, clone NT2NE2000137                                                          |
| 4230035 | SIK3      | 1,4 | 5,2E-03 | Homo sapiens SIK family kinase 3 (SIK3), mRNA.                                                              |
| 3710553 | SMOX      | 1,4 | 1,5E-02 | Homo sapiens spermine oxidase (SMOX), transcript variant 2, mRNA.                                           |
| 2230097 | TNFRSF25  | 1,4 | 8,0E-04 | Homo sapiens tumor necrosis factor receptor superfamily, member 25 (TNFRSF25), transcript variant 12, mRNA. |
| 6200669 | HIST1H2BD | 1,4 | 2,7E-02 | Homo sapiens histone cluster 1, H2bd (HIST1H2BD), transcript variant 2, mRNA.                               |
| 2260113 | HCST      | 1,4 | 2,1E-02 | Homo sapiens hematopoietic cell signal transducer (HCST), transcript variant 1, mRNA.                       |
| 2470520 | RBMS1     | 1,4 | 9,3E-04 | Homo sapiens RNA binding motif, single stranded interacting protein 1 (RBMS1), transcript variant 3, mRNA.  |
| 7510524 | CNGB1     | 1,4 | 3,4E-03 | Homo sapiens cyclic nucleotide gated channel beta 1 (CNGB1), mRNA.                                          |
| 6620576 | LOC641825 | 1,4 | 2,2E-02 | PREDICTED: Homo sapiens hypothetical protein LOC641825 (LOC641825), mRNA.                                   |
| 650328  | TNFRSF4   | 1,4 | 2,1E-02 | Homo sapiens tumor necrosis factor receptor superfamily, member 4 (TNFRSF4), mRNA.                          |
| 2000669 | ARHGAP10  | 1,4 | 1,2E-03 | Homo sapiens Rho GTPase activating protein 10 (ARHGAP10), mRNA.                                             |
| 3610730 | KCNN4     | 1,4 | 2,0E-02 | Homo sapiens potassium intermediate/small conductance calcium-activated channel, subfamily N, member 4      |
| 4260309 | MAST4     | 1,4 | 7,5E-04 | Homo sapiens microtubule associated serine/threonine kinase family member 4 (MAST4), transcript variant 2   |
| 50332   | MDFIC     | 1,4 | 9,2E-03 | Homo sapiens MyoD family inhibitor domain containing (MDFIC), mRNA.                                         |
| 3940390 | TBXAS1    | 1,4 | 1,5E-02 | Homo sapiens thromboxane A synthase 1 (platelet, cytochrome P450, family 5, subfamily A) (TBXAS1)           |
| 7210192 | ADA       | 1,4 | 1,3E-03 | Homo sapiens adenosine deaminase (ADA), mRNA.                                                               |
| 5810278 | SYTL2     | 1,4 | 9,3E-03 | Homo sapiens synaptotagmin-like 2 (SYTL2), transcript variant d, mRNA.                                      |
| 6200692 | FOXO3     | 1,4 | 1,8E-02 | Homo sapiens forkhead box O3 (FOXO3), transcript variant 2, mRNA.                                           |
| 4860634 | CCM2      | 1,4 | 7,5E-03 | Homo sapiens cerebral cavernous malformation 2 (CCM2), transcript variant 1, mRNA.                          |
| 2940537 | PPP3CA    | 1,4 | 5,4E-04 | Homo sapiens protein phosphatase 3 (formerly 2B), catalytic subunit, alpha isoform (PPP3CA), mRNA.          |
| 5550112 | LOC650845 | 1,4 | 1,3E-05 | PREDICTED: Homo sapiens similar to T-cell receptor alpha chain V region CTL-L17 precursor (LOC650845), mRNA |
| 2230113 | TANK      | 1,4 | 2,2E-03 | Homo sapiens TRAF family member-associated NFKB activator (TANK), transcript variant 1, mRNA.               |
| 4540543 | SUPT3H    | 1,4 | 2,2E-02 | Homo sapiens suppressor of Ty 3 homolog (S. cerevisiae) (SUPT3H), transcript variant 2, mRNA.               |
| 5080709 | DUSP22    | 1,4 | 2,5E-03 | PREDICTED: Homo sapiens dual specificity phosphatase 22 (DUSP22), mRNA.                                     |
| 540563  | HLA-DMA   | 1,4 | 6,1E-03 | Homo sapiens major histocompatibility complex, class II, DM alpha (HLA-DMA), mRNA.                          |
| 2810156 | IGF2R     | 1,4 | 3,0E-03 | Homo sapiens insulin-like growth factor 2 receptor (IGF2R), mRNA.                                           |
| 6020630 | MMP25     | 1,4 | 9,7E-03 | Homo sapiens matrix metalloproteinase 25 (MMP25), mRNA.                                                     |

|         |           |     |         |                                                                                                               |
|---------|-----------|-----|---------|---------------------------------------------------------------------------------------------------------------|
| 6450139 | FTHL3     | 1,4 | 4,7E-02 | Homo sapiens ferritin, heavy polypeptide-like 3 (FTHL3), non-coding RNA.                                      |
| 6660382 | CDKN1A    | 1,4 | 3,7E-02 | Homo sapiens cyclin-dependent kinase inhibitor 1A (p21, Cip1) (CDKN1A), transcript variant 1, mRNA.           |
| 3060008 | C2CD4B    | 1,4 | 3,9E-03 | Homo sapiens C2 calcium-dependent domain containing 4B (C2CD4B), mRNA.                                        |
| 2710064 | LOC387763 | 1,4 | 6,2E-03 | PREDICTED: Homo sapiens hypothetical LOC387763 (LOC387763), mRNA.                                             |
| 2490017 | ZC3H12A   | 1,4 | 3,9E-03 | Homo sapiens zinc finger CCCH-type containing 12A (ZC3H12A), mRNA.                                            |
| 6180445 | LOC389286 | 1,4 | 2,9E-02 | Homo sapiens similar to FKSG62 (LOC389286), mRNA.                                                             |
| 650112  | LST1      | 1,4 | 1,8E-02 | Homo sapiens leukocyte specific transcript 1 (LST1), transcript variant 1, mRNA.                              |
| 5870707 | SERPINA10 | 1,4 | 4,1E-02 | Homo sapiens serpin peptidase inhibitor, clade A (alpha-1 antiproteinase, antitrypsin), member 10 (SERPINA10) |
| 5870008 | HS.534427 | 1,4 | 1,6E-02 | Human mRNA for T-cell specific protein                                                                        |
| 5220661 | CCR9      | 1,4 | 4,4E-03 | Homo sapiens chemokine (C-C motif) receptor 9 (CCR9), transcript variant A, mRNA.                             |
| 7560288 | DCUN1D3   | 1,4 | 5,5E-03 | Homo sapiens DCN1, defective in cullin neddylation 1, domain containing 3 (S. cerevisiae) (DCUN1D3), mRNA.    |
| 6940463 | KCNIP3    | 1,4 | 6,2E-03 | Homo sapiens Kv channel interacting protein 3, calsenilin (KCNIP3), transcript variant 2, mRNA.               |
| 1990753 | SLA       | 1,4 | 2,1E-02 | Homo sapiens Src-like-adaptor (SLA), mRNA.                                                                    |
| 1940041 | NCF4      | 1,4 | 1,2E-02 | Homo sapiens neutrophil cytosolic factor 4, 40kDa (NCF4), transcript variant 1, mRNA.                         |
| 6650722 | IL23R     | 1,4 | 3,8E-03 | Homo sapiens interleukin 23 receptor (IL23R), mRNA.                                                           |
| 4390301 | TRPV2     | 1,4 | 9,6E-04 | Homo sapiens transient receptor potential cation channel, subfamily V, member 2 (TRPV2), mRNA.                |
| 5570376 | FAM50B    | 1,4 | 5,5E-03 | Homo sapiens family with sequence similarity 50, member B (FAM50B), mRNA.                                     |
| 1470520 | CMTM6     | 1,4 | 4,3E-03 | Homo sapiens CKLF-like MARVEL transmembrane domain containing 6 (CMTM6), mRNA.                                |
| 4830255 | DPP4      | 1,4 | 4,3E-02 | Homo sapiens dipeptidyl-peptidase 4 (DPP4), mRNA.                                                             |
| 70592   | VCL       | 1,4 | 3,1E-02 | Homo sapiens vinculin (VCL), transcript variant 1, mRNA.                                                      |
| 4810520 | TRIB1     | 1,4 | 3,7E-02 | Homo sapiens tribbles homolog 1 (Drosophila) (TRIB1), mRNA.                                                   |
| 6250010 | GPRIN3    | 1,4 | 5,6E-04 | Homo sapiens GPRIN family member 3 (GPRIN3), mRNA.                                                            |
| 3440674 | ASB2      | 1,4 | 2,3E-02 | Homo sapiens ankyrin repeat and SOCS box-containing 2 (ASB2), mRNA.                                           |
| 6270037 | RAPGEF1   | 1,4 | 3,9E-03 | Homo sapiens Rap guanine nucleotide exchange factor (GEF) 1 (RAPGEF1), transcript variant 2, mRNA.            |
| 4730703 | CYTH1     | 1,4 | 3,9E-03 | Homo sapiens cytohesin 1 (CYTH1), transcript variant 2, mRNA.                                                 |
| 2350504 | ECGF1     | 1,4 | 4,7E-03 | Homo sapiens endothelial cell growth factor 1 (platelet-derived) (ECGF1), mRNA.                               |
| 2940451 | RAB9A     | 1,4 | 7,8E-03 | Homo sapiens RAB9A, member RAS oncogene family (RAB9A), mRNA.                                                 |
| 1010328 | NEDD9     | 1,4 | 1,2E-04 | Homo sapiens neural precursor cell expressed, developmentally down-regulated 9 (NEDD9), transcript variant 1  |
| 6290519 | STOM      | 1,4 | 3,6E-03 | Homo sapiens stomatin (STOM), transcript variant 1, mRNA.                                                     |
| 4810333 | IL12RB1   | 1,4 | 1,2E-03 | Homo sapiens interleukin 12 receptor, beta 1 (IL12RB1), transcript variant 2, mRNA.                           |
| 6270193 | LOC390557 | 1,4 | 2,1E-03 | PREDICTED: Homo sapiens hypothetical LOC390557 (LOC390557), mRNA.                                             |
| 6760546 | TIPARP    | 1,4 | 2,2E-02 | Homo sapiens TCDD-inducible poly(ADP-ribose) polymerase (TIPARP), mRNA.                                       |
| 130364  | C5ORF62   | 1,4 | 1,7E-04 | Homo sapiens chromosome 5 open reading frame 62 (C5orf62), mRNA.                                              |
| 3450280 | PLEKHO1   | 1,4 | 5,2E-04 | Homo sapiens pleckstrin homology domain containing, family O member 1 (PLEKHO1), mRNA.                        |
| 3370037 | HS.561747 | 1,4 | 1,8E-02 | AGENCOURT_10520654 NIH_MGC_128 Homo sapiens cDNA clone IMAGE:6702588 5, mRNA sequence                         |
| 1710546 | CHST12    | 1,4 | 9,2E-03 | Homo sapiens carbohydrate (chondroitin 4) sulfotransferase 12 (CHST12), mRNA.                                 |
| 290468  | EIF2C2    | 1,4 | 4,0E-02 | Homo sapiens eukaryotic translation initiation factor 2C, 2 (EIF2C2), mRNA.                                   |

|         |           |     |         |                                                                                                             |
|---------|-----------|-----|---------|-------------------------------------------------------------------------------------------------------------|
| 4070524 | CERKL     | 1,4 | 2,9E-03 | Homo sapiens ceramide kinase-like (CERKL), transcript variant 1, mRNA.                                      |
| 2060291 | STOM      | 1,4 | 4,7E-02 | Homo sapiens stomatin (STOM), transcript variant 1, mRNA.                                                   |
| 5260392 | PRDM1     | 1,4 | 2,3E-02 | Homo sapiens PR domain containing 1, with ZNF domain (PRDM1), transcript variant 1, mRNA.                   |
| 1470014 | LOC124220 | 1,4 | 2,1E-02 | Homo sapiens similar to common salivary protein 1 (LOC124220), mRNA.                                        |
| 6130725 | ARHGEF18  | 1,4 | 3,2E-02 | Homo sapiens rho/rac guanine nucleotide exchange factor (GEF) 18 (ARHGEF18), mRNA.                          |
| 3890382 | ST3GAL5   | 1,4 | 1,4E-02 | Homo sapiens ST3 beta-galactoside alpha-2,3-sialyltransferase 5 (ST3GAL5), transcript variant 2, mRNA.      |
| 3370075 | S1PR4     | 1,4 | 3,9E-02 | Homo sapiens sphingosine-1-phosphate receptor 4 (S1PR4), mRNA.                                              |
| 2970431 | FTHL7     | 1,4 | 4,2E-04 | Homo sapiens ferritin, heavy polypeptide-like 7 (FTHL7) on chromosome 13.                                   |
| 3800202 | LOC390530 | 1,4 | 4,4E-02 | PREDICTED: Homo sapiens similar to Ig heavy chain V-I region HG3 precursor (LOC390530), mRNA.               |
| 1400274 | IL32      | 1,4 | 7,5E-04 | Homo sapiens interleukin 32 (IL32), transcript variant 7, mRNA.                                             |
| 2640377 | PGCP      | 1,4 | 7,2E-03 | Homo sapiens plasma glutamate carboxypeptidase (PGCP), mRNA.                                                |
| 6180288 | PTPRC     | 1,4 | 1,3E-02 | Homo sapiens protein tyrosine phosphatase, receptor type, C (PTPRC), transcript variant 4, mRNA.            |
| 1470601 | PFKFB3    | 1,4 | 2,4E-02 | Homo sapiens 6-phosphofructo-2-kinase/fructose-2,6-biphosphatase 3 (PFKFB3), mRNA.                          |
| 770167  | CD79B     | 1,3 | 1,4E-03 | Homo sapiens CD79b molecule, immunoglobulin-associated beta (CD79B), transcript variant 3, mRNA.            |
| 3890402 | SLC25A24  | 1,3 | 1,0E-02 | Homo sapiens solute carrier family 25 (mitochondrial carrier; phosphate carrier), member 24                 |
| 380672  | ZC3H12C   | 1,3 | 2,1E-02 | Homo sapiens zinc finger CCCH-type containing 12C (ZC3H12C), mRNA.                                          |
| 5670040 | ELOVL6    | 1,3 | 2,2E-02 | Homo sapiens ELOVL family member 6, elongation of long chain fatty acids (FEN1/Elo2, SUR4/Elo3-like, yeast) |
| 4200148 | CDC14B    | 1,3 | 1,6E-02 | Homo sapiens CDC14 cell division cycle 14 homolog B (S. cerevisiae) (CDC14B), transcript variant 3, mRNA.   |
| 650619  | FAM125B   | 1,3 | 2,0E-02 | Homo sapiens family with sequence similarity 125, member B (FAM125B), transcript variant 1, mRNA.           |
| 580102  | HS.554324 | 1,3 | 4,3E-02 | full-length cDNA clone CS0DI056YK21 of Placenta Cot 25-normalized of Homo sapiens (human)                   |
| 5810471 | MYO1F     | 1,3 | 2,4E-03 | Homo sapiens myosin IF (MYO1F), mRNA.                                                                       |
| 5900452 | CHST7     | 1,3 | 1,4E-02 | Homo sapiens carbohydrate (N-acetylglucosamine 6-O) sulfotransferase 7 (CHST7), mRNA.                       |
| 2750575 | HS.534439 | 1,3 | 1,4E-02 | full-length cDNA clone CS0CAP005YH21 of Thymus of Homo sapiens (human)                                      |
| 6580408 | CTSW      | 1,3 | 2,0E-02 | Homo sapiens cathepsin W (CTSW), mRNA.                                                                      |
| 3360112 | TMEM2     | 1,3 | 4,4E-03 | Homo sapiens transmembrane protein 2 (TMEM2), mRNA.                                                         |
| 4120053 | PFKFB3    | 1,3 | 1,8E-02 | Homo sapiens 6-phosphofructo-2-kinase/fructose-2,6-biphosphatase 3 (PFKFB3), mRNA.                          |
| 3140022 | ZSCAN2    | 1,3 | 3,2E-03 | Homo sapiens zinc finger and SCAN domain containing 2 (ZSCAN2), transcript variant 1, mRNA.                 |
| 1510020 | LRCH4     | 1,3 | 4,9E-03 | Homo sapiens leucine-rich repeats and calponin homology (CH) domain containing 4 (LRCH4), mRNA.             |
| 1940482 | KIFAP3    | 1,3 | 2,8E-03 | Homo sapiens kinesin-associated protein 3 (KIFAP3), mRNA.                                                   |
| 7380181 | ELOVL6    | 1,3 | 3,2E-03 | Homo sapiens ELOVL family member 6, elongation of long chain fatty acids (FEN1/Elo2, SUR4/Elo3-like, yeast) |
| 4260661 | MAPKAPK2  | 1,3 | 6,4E-03 | Homo sapiens mitogen-activated protein kinase-activated protein kinase 2 (MAPKAPK2), transcript variant 2   |
| 5310411 | H2AFJ     | 1,3 | 4,5E-02 | Homo sapiens H2A histone family, member J (H2AFJ), transcript variant 1, mRNA.                              |
| 4040754 | PERP      | 1,3 | 2,5E-03 | Homo sapiens PERP, TP53 apoptosis effector (PERP), mRNA.                                                    |
| 6840475 | HS.397465 | 1,3 | 6,1E-03 | Homo sapiens mRNA; cDNA DKFZp686F1546 (from clone DKFZp686F1546)                                            |
| 7550484 | SRGN      | 1,3 | 3,3E-02 | Homo sapiens serglycin (SRGN), mRNA.                                                                        |
| 4040097 | KLF6      | 1,3 | 4,7E-02 | Homo sapiens Kruppel-like factor 6 (KLF6), transcript variant 2, mRNA.                                      |
| 1410279 | APOBEC3F  | 1,3 | 7,6E-03 | Homo sapiens apolipoprotein B mRNA editing enzyme, catalytic polypeptide-like 3F (APOBEC3F)                 |

|         |           |      |         |                                                                                                                 |
|---------|-----------|------|---------|-----------------------------------------------------------------------------------------------------------------|
| 7560037 | KIAA1949  | 1,3  | 1,0E-02 | Homo sapiens KIAA1949 (KIAA1949), mRNA.                                                                         |
| 1980451 | C16ORF67  | 1,3  | 1,7E-02 | Homo sapiens chromosome 16 open reading frame 67 (C16orf67), non-coding RNA.                                    |
| 3460142 | SH2D2A    | 1,3  | 2,6E-02 | Homo sapiens SH2 domain protein 2A (SH2D2A), mRNA.                                                              |
| 4210619 | CD2       | 1,3  | 1,1E-03 | Homo sapiens CD2 molecule (CD2), mRNA.                                                                          |
| 7330070 | LOC201175 | 1,3  | 4,2E-02 | Homo sapiens hypothetical protein LOC201175 (LOC201175), mRNA.                                                  |
| 4920053 | BTG3      | 1,3  | 1,9E-02 | Homo sapiens BTG family, member 3 (BTG3), mRNA.                                                                 |
| 3460008 | TMEM173   | 1,3  | 1,3E-02 | Homo sapiens transmembrane protein 173 (TMEM173), nuclear gene encoding mitochondrial protein, mRNA.            |
| 990735  | RNF149    | 1,3  | 1,3E-02 | Homo sapiens ring finger protein 149 (RNF149), mRNA.                                                            |
| 6350189 | MGC4677   | 1,3  | 3,3E-02 | Homo sapiens hypothetical protein MGC4677 (MGC4677), mRNA.                                                      |
| 4880193 | KLRG1     | 1,3  | 4,2E-02 | Homo sapiens killer cell lectin-like receptor subfamily G, member 1 (KLRG1), mRNA.                              |
| 780168  | ISCU      | 1,3  | 7,1E-03 | Homo sapiens iron-sulfur cluster scaffold homolog (E. coli) (ISCU), nuclear gene encoding mitochondrial protein |
| 7380601 | ERMP1     | 1,3  | 3,0E-03 | Homo sapiens endoplasmic reticulum metalloproteinase 1 (ERMP1), mRNA.                                           |
| 6860196 | WIPF1     | 1,3  | 4,0E-03 | Homo sapiens WAS/WASL interacting protein family, member 1 (WIPF1), transcript variant 2, mRNA.                 |
| 5260475 | LOC650815 | 1,3  | 7,0E-03 | PREDICTED: Homo sapiens similar to T-cell receptor alpha chain V region CTL-L17 precursor (LOC650815), mRNA.    |
| 70431   | LOC650799 | 1,3  | 2,4E-02 | PREDICTED: Homo sapiens similar to Ig lambda chain V-I region BL2 precursor (LOC650799), mRNA.                  |
| 1690446 | PNPLA6    | 1,3  | 1,1E-02 | Homo sapiens patatin-like phospholipase domain containing 6 (PNPLA6), mRNA.                                     |
| 3710626 | DUSP22    | 1,3  | 1,8E-02 | Homo sapiens dual specificity phosphatase 22 (DUSP22), mRNA.                                                    |
| 6620397 | ISCU      | 1,3  | 7,5E-03 | Homo sapiens iron-sulfur cluster scaffold homolog (E. coli) (ISCU), nuclear gene encoding mitochondrial protein |
| 5700088 | KLF11     | 1,3  | 4,3E-03 | PREDICTED: Homo sapiens Kruppel-like factor 11 (KLF11), mRNA.                                                   |
| 450379  | PRDM1     | 1,3  | 4,7E-03 | Homo sapiens PR domain containing 1, with ZNF domain (PRDM1), transcript variant 2, mRNA.                       |
| 4220767 | SMAD7     | 1,3  | 9,9E-03 | Homo sapiens SMAD family member 7 (SMAD7), mRNA.                                                                |
| 130661  | LOC650795 | 1,3  | 4,4E-03 | PREDICTED: Homo sapiens similar to T-cell receptor alpha chain V region PY14 precursor (LOC650795), mRNA.       |
| 5420441 | TNFSF9    | 1,3  | 7,6E-03 | Homo sapiens tumor necrosis factor (ligand) superfamily, member 9 (TNFSF9), mRNA.                               |
| 6250484 | CFH       | 1,3  | 7,2E-03 | Homo sapiens complement factor H (CFH), transcript variant 2, mRNA.                                             |
| 780278  | SLC10A3   | 1,3  | 1,6E-02 | Homo sapiens solute carrier family 10 (sodium/bile acid cotransporter family), member 3 (SLC10A3), mRNA.        |
| 4780102 | DIS3L2    | -1,3 | 3,1E-03 | Homo sapiens DIS3 mitotic control homolog (S. cerevisiae)-like 2 (DIS3L2), mRNA.                                |
| 2970296 | ALG8      | -1,3 | 2,9E-02 | Homo sapiens asparagine-linked glycosylation 8, alpha-1,3-glucosyltransferase homolog (S. cerevisiae) (ALG8)    |
| 4390630 | STAG3     | -1,3 | 1,6E-02 | Homo sapiens stromal antigen 3 (STAG3), mRNA.                                                                   |
| 5700273 | RAB3GAP2  | -1,3 | 9,5E-04 | Homo sapiens RAB3 GTPase activating protein subunit 2 (non-catalytic) (RAB3GAP2), mRNA.                         |
| 2140273 | PRIM1     | -1,3 | 3,6E-03 | Homo sapiens primase, DNA, polypeptide 1 (49kDa) (PRIM1), mRNA.                                                 |
| 1230470 | RHOA      | -1,3 | 1,3E-02 | Homo sapiens ras homolog gene family, member U (RHOA), mRNA.                                                    |
| 6420168 | DBNDD2    | -1,3 | 2,0E-02 | Homo sapiens dysbindin (dystrobrevin binding protein 1) domain containing 2 (DBNDD2), transcript variant 3      |
| 5820491 | MAP7      | -1,3 | 5,5E-03 | Homo sapiens microtubule-associated protein 7 (MAP7), mRNA.                                                     |
| 5720598 | MYO1B     | -1,3 | 1,5E-02 | Homo sapiens myosin IB (MYO1B), mRNA.                                                                           |
| 4040201 | IL31      | -1,3 | 1,1E-03 | Homo sapiens interleukin 31 (IL31), mRNA.                                                                       |
| 5310747 | PSIP1     | -1,3 | 8,9E-03 | Homo sapiens PC4 and SFRS1 interacting protein 1 (PSIP1), transcript variant 2, mRNA.                           |
| 5910433 | CHDH      | -1,3 | 7,8E-03 | Homo sapiens choline dehydrogenase (CHDH), mRNA.                                                                |

|         |           |      |         |                                                                                                               |
|---------|-----------|------|---------|---------------------------------------------------------------------------------------------------------------|
| 7160753 | SAE1      | -1,3 | 5,2E-03 | Homo sapiens SUMO1 activating enzyme subunit 1 (SAE1), mRNA.                                                  |
| 1430735 | NET1      | -1,3 | 1,2E-02 | Homo sapiens neuroepithelial cell transforming 1 (NET1), transcript variant 1, mRNA.                          |
| 1240300 | ENO3      | -1,3 | 3,3E-02 | Homo sapiens enolase 3 (beta, muscle) (ENO3), transcript variant 1, mRNA.                                     |
| 6420398 | AKAP11    | -1,3 | 7,6E-03 | Homo sapiens A kinase (PRKA) anchor protein 11 (AKAP11), mRNA.                                                |
| 5720537 | ACPL2     | -1,3 | 7,5E-04 | Homo sapiens acid phosphatase-like 2 (ACPL2), transcript variant 1, mRNA.                                     |
| 6510131 | LOC728115 | -1,3 | 1,5E-02 | PREDICTED: Homo sapiens misc_RNA (LOC728115), miscRNA.                                                        |
| 610435  | SSB       | -1,3 | 2,6E-02 | Homo sapiens Sjogren syndrome antigen B (autoantigen La) (SSB), mRNA.                                         |
| 7570209 | ARMC1     | -1,3 | 1,3E-02 | Homo sapiens armadillo repeat containing 1 (ARMC1), mRNA.                                                     |
| 780162  | SEPN1     | -1,3 | 4,6E-03 | Homo sapiens selenoprotein N, 1 (SEPN1), transcript variant 1, mRNA.                                          |
| 2100292 | RBBP7     | -1,3 | 4,1E-02 | Homo sapiens retinoblastoma binding protein 7 (RBBP7), mRNA.                                                  |
| 2100524 | SPG11     | -1,3 | 1,7E-02 | Homo sapiens spastic paraplegia 11 (autosomal recessive) (SPG11), transcript variant 1, mRNA.                 |
| 4230286 | ZSWIM1    | -1,3 | 1,3E-02 | Homo sapiens zinc finger, SWIM-type containing 1 (ZSWIM1), mRNA.                                              |
| 2630474 | MLLT11    | -1,3 | 2,9E-02 | Homo sapiens myeloid/lymphoid or mixed-lineage leukemia (trithorax homolog, Drosophila); translocated to, 11  |
| 7050523 | API5      | -1,3 | 2,5E-02 | Homo sapiens apoptosis inhibitor 5 (API5), mRNA.                                                              |
| 4210553 | C14ORF109 | -1,3 | 4,0E-02 | Homo sapiens chromosome 14 open reading frame 109 (C14orf109), transcript variant 2, mRNA.                    |
| 1990379 | SLFN11    | -1,3 | 3,0E-02 | Homo sapiens schlafen family member 11 (SLFN11), mRNA.                                                        |
| 7150661 | HK2       | -1,3 | 4,2E-02 | Homo sapiens hexokinase 2 (HK2), mRNA.                                                                        |
| 770592  | TNFSF14   | -1,3 | 2,2E-02 | Homo sapiens tumor necrosis factor (ligand) superfamily, member 14 (TNFSF14), transcript variant 1, mRNA.     |
| 1450333 | AKAP11    | -1,3 | 3,4E-03 | Homo sapiens A kinase (PRKA) anchor protein 11 (AKAP11), mRNA.                                                |
| 4890324 | HS.538259 | -1,3 | 2,2E-02 | Homo sapiens cDNA clone IMAGE:5260685                                                                         |
| 3370092 | STK39     | -1,3 | 2,1E-02 | Homo sapiens serine threonine kinase 39 (STE20/SPS1 homolog, yeast) (STK39), mRNA.                            |
| 2970703 | RNF125    | -1,3 | 8,4E-03 | Homo sapiens ring finger protein 125 (RNF125), mRNA.                                                          |
| 4210189 | TCEA1     | -1,3 | 8,8E-03 | Homo sapiens transcription elongation factor A (SII), 1 (TCEA1), transcript variant 1, mRNA.                  |
| 6770343 | ETFB      | -1,3 | 4,7E-03 | Homo sapiens electron-transfer-flavoprotein, beta polypeptide (ETFB), transcript variant 2, mRNA.             |
| 830768  | FLJ43681  | -1,3 | 9,4E-03 | PREDICTED: Homo sapiens similar to 60S ribosomal protein L23a (FLJ43681), miscRNA.                            |
| 7380270 | MRPS35    | -1,3 | 1,9E-02 | Homo sapiens mitochondrial ribosomal protein S35 (MRPS35), nuclear gene encoding mitochondrial protein, mRNA. |
| 3780451 | CORO1B    | -1,3 | 3,3E-02 | Homo sapiens coronin, actin binding protein, 1B (CORO1B), transcript variant 1, mRNA.                         |
| 6200685 | PARVG     | -1,3 | 1,3E-02 | Homo sapiens parvin, gamma (PARVG), mRNA.                                                                     |
| 6040286 | PER2      | -1,3 | 3,9E-03 | Homo sapiens period homolog 2 (Drosophila) (PER2), mRNA.                                                      |
| 1300239 | TRIM44    | -1,3 | 2,1E-03 | Homo sapiens tripartite motif-containing 44 (TRIM44), mRNA.                                                   |
| 4250670 | SLC43A3   | -1,3 | 1,8E-02 | Homo sapiens solute carrier family 43, member 3 (SLC43A3), mRNA.                                              |
| 6250553 | ITFG3     | -1,3 | 2,4E-02 | Homo sapiens integrin alpha FG-GAP repeat containing 3 (ITFG3), mRNA.                                         |
| 3420739 | SNTB1     | -1,3 | 2,6E-03 | Homo sapiens syntrophin, beta 1 (dystrophin-associated protein A1, 59kDa, basic component 1) (SNTB1), mRNA.   |
| 940471  | C5ORF13   | -1,3 | 1,8E-02 | Homo sapiens chromosome 5 open reading frame 13 (C5orf13), mRNA.                                              |
| 1170440 | AHCYL1    | -1,3 | 1,8E-03 | Homo sapiens adenosylhomocysteinase-like 1 (AHCYL1), mRNA.                                                    |
| 1170673 | TNFSF14   | -1,3 | 1,9E-02 | Homo sapiens tumor necrosis factor (ligand) superfamily, member 14 (TNFSF14), transcript variant 2, mRNA.     |
| 1050082 | KIAA1147  | -1,3 | 3,7E-02 | Homo sapiens KIAA1147 (KIAA1147), mRNA.                                                                       |

|         |              |      |         |                                                                                                               |
|---------|--------------|------|---------|---------------------------------------------------------------------------------------------------------------|
| 6550209 | KIF2A        | -1,3 | 1,7E-02 | Homo sapiens kinesin heavy chain member 2A (KIF2A), mRNA.                                                     |
| 7320041 | CHST15       | -1,3 | 3,9E-02 | Homo sapiens carbohydrate (N-acetylgalactosamine 4-sulfate 6-O) sulfotransferase 15 (CHST15), mRNA.           |
| 2340709 | ZMYM3        | -1,3 | 3,4E-02 | Homo sapiens zinc finger, MYM-type 3 (ZMYM3), transcript variant 2, mRNA.                                     |
| 5360121 | THYN1        | -1,4 | 3,4E-03 | Homo sapiens thymocyte nuclear protein 1 (THYN1), transcript variant 2, mRNA.                                 |
| 7330180 | AUH          | -1,4 | 1,1E-03 | Homo sapiens AU RNA binding protein/enoyl-Coenzyme A hydratase (AUH)                                          |
| 510452  | FHIT         | -1,4 | 4,2E-03 | Homo sapiens fragile histidine triad gene (FHIT), mRNA.                                                       |
| 6020468 | PPP1R14A     | -1,4 | 5,4E-04 | Homo sapiens protein phosphatase 1, regulatory (inhibitor) subunit 14A (PPP1R14A), mRNA.                      |
| 6620475 | ORC2L        | -1,4 | 2,7E-03 | Homo sapiens origin recognition complex, subunit 2-like (yeast) (ORC2L), mRNA.                                |
| 1070035 | ETFB         | -1,4 | 3,2E-03 | Homo sapiens electron-transfer-flavoprotein, beta polypeptide (ETFB), transcript variant 2, mRNA.             |
| 520184  | HPCAL1       | -1,4 | 4,7E-02 | Homo sapiens hippocalcin-like 1 (HPCAL1), transcript variant 2, mRNA.                                         |
| 4490520 | EBI2         | -1,4 | 4,8E-02 | Homo sapiens Epstein-Barr virus induced gene 2 (lymphocyte-specific G protein-coupled receptor) (EBI2), mRNA. |
| 6180440 | PSMC4        | -1,4 | 2,2E-02 | Homo sapiens proteasome (prosome, macropain) 26S subunit, ATPase, 4 (PSMC4), transcript variant 1, mRNA.      |
| 1340491 | SP110        | -1,4 | 3,8E-02 | Homo sapiens SP110 nuclear body protein (SP110), transcript variant b, mRNA.                                  |
| 7510392 | DIP2B        | -1,4 | 1,7E-04 | Homo sapiens DIP2 disco-interacting protein 2 homolog B (Drosophila) (DIP2B), mRNA.                           |
| 6270646 | MYC          | -1,4 | 2,8E-02 | Homo sapiens v-myc myelocytomatosis viral oncogene homolog (avian) (MYC), mRNA.                               |
| 7150059 | STAMBPL1     | -1,4 | 2,8E-03 | Homo sapiens STAM binding protein-like 1 (STAMBPL1), mRNA.                                                    |
| 7510367 | GPR160       | -1,4 | 3,2E-03 | Homo sapiens G protein-coupled receptor 160 (GPR160), mRNA.                                                   |
| 130433  | CTTN         | -1,4 | 2,1E-03 | Homo sapiens cortactin (CTTN), transcript variant 1, mRNA.                                                    |
| 4490053 | IL10RA       | -1,4 | 1,1E-02 | Homo sapiens interleukin 10 receptor, alpha (IL10RA), mRNA.                                                   |
| 6370414 | CLECL1       | -1,4 | 3,1E-02 | Homo sapiens C-type lectin-like 1 (CLECL1), mRNA.                                                             |
| 7560292 | LOC100134018 | -1,4 | 8,0E-04 | PREDICTED: Homo sapiens similar to hCG1774568 (LOC100134018), mRNA.                                           |
| 20491   | UBE2F        | -1,4 | 2,9E-03 | Homo sapiens ubiquitin-conjugating enzyme E2F (putative) (UBE2F), mRNA.                                       |
| 6350711 | LPP          | -1,4 | 2,0E-02 | Homo sapiens LIM domain containing preferred translocation partner in lipoma (LPP), mRNA.                     |
| 7050719 | C1ORF162     | -1,4 | 2,2E-02 | Homo sapiens chromosome 1 open reading frame 162 (C1orf162), mRNA.                                            |
| 2230201 | TARBP1       | -1,4 | 1,3E-02 | Homo sapiens TAR (HIV-1) RNA binding protein 1 (TARBP1), mRNA.                                                |
| 1340470 | CECR5        | -1,4 | 2,4E-02 | Homo sapiens cat eye syndrome chromosome region, candidate 5 (CECR5), transcript variant 2, mRNA.             |
| 770424  | CTGLF3       | -1,4 | 1,5E-02 | Homo sapiens centaurin, gamma-like family, member 3 (CTGLF3), mRNA.                                           |
| 6960397 | EPHX2        | -1,4 | 5,2E-03 | Homo sapiens epoxide hydrolase 2, cytoplasmic (EPHX2), mRNA.                                                  |
| 7040161 | HELLS        | -1,4 | 4,6E-02 | Homo sapiens helicase, lymphoid-specific (HELLS), mRNA.                                                       |
| 5050670 | NUP160       | -1,4 | 9,4E-03 | Homo sapiens nucleoporin 160kDa (NUP160), mRNA.                                                               |
| 4220605 | ETS2         | -1,4 | 8,9E-04 | Homo sapiens v-ets erythroblastosis virus E26 oncogene homolog 2 (avian) (ETS2), mRNA.                        |
| 4780196 | CD300A       | -1,4 | 2,5E-02 | Homo sapiens CD300a molecule (CD300A), mRNA.                                                                  |
| 6550600 | MYC          | -1,4 | 2,4E-02 | Homo sapiens v-myc myelocytomatosis viral oncogene homolog (avian) (MYC), mRNA.                               |
| 4760427 | AGTPBP1      | -1,4 | 3,1E-02 | Homo sapiens ATP/GTP binding protein 1 (AGTPBP1), mRNA.                                                       |
| 4050400 | HMMR         | -1,4 | 3,8E-04 | Homo sapiens hyaluronan-mediated motility receptor (RHAMM) (HMMR), transcript variant 1, mRNA.                |
| 1190452 | SYPL1        | -1,4 | 1,9E-03 | Homo sapiens synaptophysin-like 1 (SYPL1), transcript variant 2, mRNA.                                        |
| 6100372 | FIGNL1       | -1,4 | 4,4E-03 | Homo sapiens fidgetin-like 1 (FIGNL1), transcript variant 1, mRNA.                                            |

|         |           |      |         |                                                                                                               |
|---------|-----------|------|---------|---------------------------------------------------------------------------------------------------------------|
| 2140343 | AGAP8     | -1,4 | 5,9E-03 | Homo sapiens ArfGAP with GTPase domain, ankyrin repeat and PH domain 8 (AGAP8), mRNA.                         |
| 5260035 | LGALS14   | -1,4 | 5,2E-03 | Homo sapiens lectin, galactoside-binding, soluble, 14 (LGALS14), transcript variant 1, mRNA.                  |
| 110427  | TCEA1     | -1,4 | 3,6E-02 | Homo sapiens transcription elongation factor A (SII), 1 (TCEA1), transcript variant 2, mRNA.                  |
| 2640341 | FKBP5     | -1,4 | 7,6E-03 | Homo sapiens FK506 binding protein 5 (FKBP5), mRNA.                                                           |
| 3290685 | DPYSL2    | -1,4 | 2,8E-03 | Homo sapiens dihydropyrimidinase-like 2 (DPYSL2), mRNA.                                                       |
| 4050639 | PAICS     | -1,4 | 4,5E-03 | Homo sapiens phosphoribosylaminoimidazole carboxylase, PAICS, transcript variant 2, mRNA.                     |
| 160554  | ARID5A    | -1,4 | 3,0E-03 | Homo sapiens AT rich interactive domain 5A (MRF1-like) (ARID5A), mRNA.                                        |
| 1070279 | DLK2      | -1,4 | 1,0E-03 | Homo sapiens delta-like 2 homolog (Drosophila) (DLK2), transcript variant 2, mRNA.                            |
| 870563  | RNF138    | -1,4 | 7,2E-03 | Homo sapiens ring finger protein 138 (RNF138), transcript variant 1, mRNA.                                    |
| 1400037 | OXCT2     | -1,4 | 3,2E-03 | Homo sapiens 3-oxoacid CoA transferase 2 (OXCT2), mRNA.                                                       |
| 3800047 | AIF1      | -1,4 | 3,7E-02 | Homo sapiens allograft inflammatory factor 1 (AIF1), transcript variant 1, mRNA.                              |
| 6220242 | ETFB      | -1,4 | 3,2E-04 | Homo sapiens electron-transfer-flavoprotein, beta polypeptide (ETFB), transcript variant 1, mRNA.             |
| 2760068 | HS.481464 | -1,4 | 5,5E-03 | Homo sapiens cDNA FLJ13116 fis, clone NT2RP3002659                                                            |
| 5390246 | CCR7      | -1,4 | 2,1E-02 | Homo sapiens chemokine (C-C motif) receptor 7 (CCR7), mRNA.                                                   |
| 540368  | GAB2      | -1,4 | 4,0E-03 | Homo sapiens GRB2-associated binding protein 2 (GAB2), transcript variant 1, mRNA.                            |
| 6560564 | PRKCA     | -1,4 | 1,1E-02 | Homo sapiens protein kinase C, alpha (PRKCA), mRNA.                                                           |
| 780240  | C12ORF24  | -1,4 | 1,4E-02 | Homo sapiens chromosome 12 open reading frame 24 (C12orf24), mRNA.                                            |
| 6100468 | NPTX1     | -1,4 | 2,8E-02 | Homo sapiens neuronal pentraxin I (NPTX1), mRNA.                                                              |
| 5720424 | NRP1      | -1,4 | 1,5E-03 | Homo sapiens neuropilin 1 (NRP1), transcript variant 1, mRNA.                                                 |
| 2320017 | IL13      | -1,4 | 5,4E-04 | Homo sapiens interleukin 13 (IL13), mRNA.                                                                     |
| 3840593 | SP110     | -1,4 | 2,7E-02 | Homo sapiens SP110 nuclear body protein (SP110), transcript variant b, mRNA.                                  |
| 5560482 | UBQLN2    | -1,4 | 6,4E-05 | Homo sapiens ubiquilin 2 (UBQLN2), mRNA.                                                                      |
| 3610372 | C3ORF26   | -1,4 | 4,0E-02 | Homo sapiens chromosome 3 open reading frame 26 (C3orf26), mRNA.                                              |
| 2940403 | FAM60A    | -1,4 | 8,4E-03 | Homo sapiens family with sequence similarity 60, member A (FAM60A), transcript variant 1, mRNA.               |
| 5490068 | MCOLN2    | -1,4 | 5,0E-04 | Homo sapiens mucolipin 2 (MCOLN2), mRNA.                                                                      |
| 1090523 | RYK       | -1,4 | 8,9E-05 | Homo sapiens RYK receptor-like tyrosine kinase (RYK), transcript variant 1, mRNA.                             |
| 1440243 | SEPX1     | -1,4 | 2,2E-04 | Homo sapiens selenoprotein X, 1 (SEPX1), mRNA.                                                                |
| 3370372 | C3ORF18   | -1,4 | 5,4E-04 | Homo sapiens chromosome 3 open reading frame 18 (C3orf18), mRNA.                                              |
| 3190112 | SERPINB1  | -1,4 | 3,6E-03 | Homo sapiens serpin peptidase inhibitor, clade B (ovalbumin), member 1 (SERPINB1), mRNA.                      |
| 1230767 | IFITM2    | -1,5 | 1,4E-02 | Homo sapiens interferon induced transmembrane protein 2 (1-8D) (IFITM2), mRNA.                                |
| 160242  | C13ORF15  | -1,5 | 3,2E-02 | Homo sapiens chromosome 13 open reading frame 15 (C13orf15), mRNA.                                            |
| 4070053 | BCAR3     | -1,5 | 9,5E-05 | Homo sapiens breast cancer anti-estrogen resistance 3 (BCAR3), mRNA.                                          |
| 4040037 | EBI2      | -1,5 | 2,1E-02 | Homo sapiens Epstein-Barr virus induced gene 2 (lymphocyte-specific G protein-coupled receptor) (EBI2), mRNA. |
| 1030333 | CCL2      | -1,5 | 7,2E-03 | Homo sapiens chemokine (C-C motif) ligand 2 (CCL2), mRNA.                                                     |
| 4900653 | IFFO2     | -1,5 | 1,2E-02 | Homo sapiens intermediate filament family orphan 2 (IFFO2), mRNA.                                             |
| 5820551 | CT45A4    | -1,5 | 9,2E-04 | Homo sapiens cancer/testis antigen family 45, member A4 (CT45A4), mRNA.                                       |
| 5910541 | CTNS      | -1,5 | 3,7E-02 | Homo sapiens cystinosis, nephropathic (CTNS), transcript variant 2, mRNA.                                     |



|         |              |      |         |                                                                                                               |
|---------|--------------|------|---------|---------------------------------------------------------------------------------------------------------------|
| 2320079 | NME4         | -1,5 | 4,1E-02 | Homo sapiens non-metastatic cells 4, protein expressed in (NME4), nuclear gene encoding mitochondrial protein |
| 620092  | ATP6V0A2     | -1,5 | 1,6E-02 | Homo sapiens ATPase, H <sup>+</sup> transporting, lysosomal V0 subunit a2 (ATP6V0A2), mRNA.                   |
| 4830674 | BEX2         | -1,5 | 1,5E-02 | Homo sapiens brain expressed X-linked 2 (BEX2), mRNA.                                                         |
| 4850253 | TNFRSF8      | -1,5 | 3,1E-02 | Homo sapiens tumor necrosis factor receptor superfamily, member 8 (TNFRSF8), transcript variant 2, mRNA.      |
| 6760593 | OSBPL10      | -1,5 | 9,3E-05 | Homo sapiens oxysterol binding protein-like 10 (OSBPL10), mRNA.                                               |
| 6660768 | IRF2BP2      | -1,5 | 4,3E-02 | Homo sapiens interferon regulatory factor 2 binding protein 2 (IRF2BP2), transcript variant 1, mRNA.          |
| 580403  | DFNA5        | -1,5 | 3,3E-03 | Homo sapiens deafness, autosomal dominant 5 (DFNA5), transcript variant 1, mRNA.                              |
| 2810601 | LEF1         | -1,5 | 4,9E-03 | Homo sapiens lymphoid enhancer-binding factor 1 (LEF1), mRNA.                                                 |
| 1780402 | SEPN1        | -1,5 | 2,6E-04 | Homo sapiens selenoprotein N, 1 (SEPN1), transcript variant 2, mRNA.                                          |
| 5890102 | ENOPH1       | -1,5 | 2,5E-05 | Homo sapiens enolase-phosphatase 1 (ENOPH1), mRNA.                                                            |
| 1170575 | LOC100129882 | -1,5 | 2,2E-02 | PREDICTED: Homo sapiens similar to mCG49427 (LOC100129882), mRNA.                                             |
| 3890228 | MPZL2        | -1,5 | 9,8E-03 | Homo sapiens myelin protein zero-like 2 (MPZL2), transcript variant 1, mRNA.                                  |
| 2630563 | SLC39A14     | -1,5 | 3,3E-03 | Homo sapiens solute carrier family 39 (zinc transporter), member 14 (SLC39A14), mRNA.                         |
| 6770242 | MARCKSL1     | -1,5 | 2,3E-04 | Homo sapiens MARCKS-like 1 (MARCKSL1), mRNA.                                                                  |
| 4570255 | LEF1         | -1,5 | 2,4E-03 | Homo sapiens lymphoid enhancer-binding factor 1 (LEF1), mRNA.                                                 |
| 2640110 | EXOC2        | -1,5 | 1,7E-04 | Homo sapiens exocyst complex component 2 (EXOC2), mRNA.                                                       |
| 4810343 | ETV3         | -1,5 | 5,5E-03 | Homo sapiens ets variant 3 (ETV3), transcript variant 2, mRNA.                                                |
| 2070373 | DENND5A      | -1,6 | 7,5E-04 | Homo sapiens DENN/MADD domain containing 5A (DENND5A), mRNA.                                                  |
| 3170593 | PTPRA        | -1,6 | 5,6E-04 | Homo sapiens protein tyrosine phosphatase, receptor type, A (PTPRA), transcript variant 2, mRNA.              |
| 5080364 | ACTN1        | -1,6 | 1,8E-02 | Homo sapiens actinin, alpha 1 (ACTN1), mRNA.                                                                  |
| 2940291 | QPRT         | -1,6 | 1,2E-02 | Homo sapiens quinolinate phosphoribosyltransferase (QPRT), mRNA.                                              |
| 60706   | SDCCAG3      | -1,6 | 3,3E-04 | Homo sapiens serologically defined colon cancer antigen 3 (SDCCAG3), transcript variant 3, mRNA.              |
| 1030364 | NDFIP2       | -1,6 | 1,6E-04 | Homo sapiens Nedd4 family interacting protein 2 (NDFIP2), mRNA.                                               |
| 2320576 | RBM47        | -1,6 | 6,7E-06 | Homo sapiens RNA binding motif protein 47 (RBM47), transcript variant 2, mRNA.                                |
| 4920064 | CISH         | -1,6 | 4,9E-02 | Homo sapiens cytokine inducible SH2-containing protein (CISH), mRNA.                                          |
| 7040553 | SDCCAG3      | -1,6 | 1,1E-04 | Homo sapiens serologically defined colon cancer antigen 3 (SDCCAG3), transcript variant 3, mRNA.              |
| 1260064 | LOC25845     | -1,6 | 5,4E-04 | Homo sapiens hypothetical LOC25845 (LOC25845), non-coding RNA.                                                |
| 5910609 | IL4R         | -1,6 | 2,9E-03 | Homo sapiens interleukin 4 receptor (IL4R), transcript variant 1, mRNA.                                       |
| 7200301 | ARID5A       | -1,6 | 1,6E-03 | Homo sapiens AT rich interactive domain 5A (MRF1-like) (ARID5A), mRNA.                                        |
| 2030142 | CLC          | -1,6 | 2,2E-02 | Homo sapiens Charcot-Leyden crystal protein (CLC), mRNA.                                                      |
| 630315  | DHRS9        | -1,6 | 1,7E-03 | Homo sapiens dehydrogenase/reductase (SDR family) member 9 (DHRS9), transcript variant 1, mRNA.               |
| 5290626 | C14ORF4      | -1,6 | 2,9E-03 | Homo sapiens chromosome 14 open reading frame 4 (C14orf4), mRNA.                                              |
| 1260270 | AIM2         | -1,6 | 1,9E-04 | Homo sapiens absent in melanoma 2 (AIM2), mRNA.                                                               |
| 7000356 | RXRA         | -1,6 | 2,4E-02 | Homo sapiens retinoid X receptor, alpha (RXRA), mRNA.                                                         |
| 1820632 | PTGS2        | -1,7 | 2,9E-03 | Homo sapiens prostaglandin-endoperoxide synthase 2 (prostaglandin G/H synthase and cyclooxygenase)            |
| 6650242 | IFITM3       | -1,7 | 5,3E-03 | Homo sapiens interferon induced transmembrane protein 3 (1-8U) (IFITM3), mRNA.                                |
| 6980370 | IRF4         | -1,7 | 3,1E-04 | Homo sapiens interferon regulatory factor 4 (IRF4), mRNA.                                                     |

|         |           |      |         |                                                                                                           |
|---------|-----------|------|---------|-----------------------------------------------------------------------------------------------------------|
| 4120131 | KISS1R    | -1,7 | 1,3E-02 | Homo sapiens KISS1 receptor (KISS1R), mRNA.                                                               |
| 4200209 | RBKS      | -1,7 | 3,7E-02 | Homo sapiens ribokinase (RBKS), mRNA.                                                                     |
| 4850014 | ARID5A    | -1,7 | 1,1E-04 | Homo sapiens AT rich interactive domain 5A (MRF1-like) (ARID5A), mRNA.                                    |
| 4050491 | TCEA3     | -1,7 | 5,2E-03 | Homo sapiens transcription elongation factor A (SII), 3 (TCEA3), mRNA.                                    |
| 610113  | TNFSF14   | -1,7 | 4,9E-04 | Homo sapiens tumor necrosis factor (ligand) superfamily, member 14 (TNFSF14), transcript variant 1, mRNA. |
| 5360156 | IFITM1    | -1,7 | 3,9E-03 | Homo sapiens interferon induced transmembrane protein 1 (9-27) (IFITM1), mRNA.                            |
| 5420564 | NFIL3     | -1,7 | 9,9E-04 | Homo sapiens nuclear factor, interleukin 3 regulated (NFIL3), mRNA.                                       |
| 2640408 | DENND5A   | -1,7 | 2,9E-04 | Homo sapiens DENN/MADD domain containing 5A (DENND5A), mRNA.                                              |
| 2850576 | SEMA4A    | -1,7 | 5,1E-04 | Homo sapiens sema domain, immunoglobulin domain (Ig), transmembrane domain (TM) andSEMA4A                 |
| 70288   | HS.150067 | -1,7 | 1,6E-04 | Homo sapiens cDNA FLJ43367 fis, clone NT2RP8000435                                                        |
| 3840377 | IL4       | -1,8 | 1,2E-03 | Homo sapiens interleukin 4 (IL4), transcript variant 2, mRNA.                                             |
| 5910719 | GATA3     | -1,8 | 2,4E-05 | Homo sapiens GATA binding protein 3 (GATA3), transcript variant 2, mRNA.                                  |
| 6400243 | ABLIM1    | -1,8 | 2,5E-03 | Homo sapiens actin binding LIM protein 1 (ABLIM1), transcript variant 2, mRNA.                            |
| 450253  | PTK2      | -1,8 | 7,1E-06 | Homo sapiens PTK2 protein tyrosine kinase 2 (PTK2), transcript variant 2, mRNA.                           |
| 5270743 | PTPRA     | -1,8 | 4,0E-06 | Homo sapiens protein tyrosine phosphatase, receptor type, A (PTPRA), transcript variant 3, mRNA.          |
| 630278  | H1F0      | -1,8 | 2,5E-03 | Homo sapiens H1 histone family, member 0 (H1F0), mRNA.                                                    |
| 4780600 | RBM47     | -1,8 | 1,7E-06 | Homo sapiens RNA binding motif protein 47 (RBM47), transcript variant 1, mRNA.                            |
| 5720609 | DYNC2LI1  | -1,8 | 2,3E-04 | Homo sapiens dynein, cytoplasmic 2, light intermediate chain 1 (DYNC2LI1), transcript variant 1, mRNA.    |
| 4560328 | FSCN1     | -1,8 | 7,6E-03 | Homo sapiens fascin homolog 1, actin-bundling protein (Strongylocentrotus purpuratus) (FSCN1), mRNA.      |
| 3450136 | RNF144    | -1,8 | 7,4E-06 | Homo sapiens ring finger protein 144 (RNF144), mRNA.                                                      |
| 3420332 | SLC37A3   | -1,8 | 1,8E-05 | Homo sapiens solute carrier family 37 (glycerol-3-phosphate transporter), member 3 (SLC37A3)              |
| 240682  | ANKRD37   | -1,8 | 1,9E-02 | Homo sapiens ankyrin repeat domain 37 (ANKRD37), mRNA.                                                    |
| 6660161 | RNF144A   | -1,8 | 9,7E-07 | Homo sapiens ring finger protein 144A (RNF144A), mRNA.                                                    |
| 1990300 | SOCS1     | -1,9 | 1,3E-03 | Homo sapiens suppressor of cytokine signaling 1 (SOCS1), mRNA.                                            |
| 2140059 | C1ORF165  | -1,9 | 1,8E-05 | Homo sapiens chromosome 1 open reading frame 165 (C1orf165), mRNA.                                        |
| 2570112 | ABLIM1    | -1,9 | 1,6E-03 | Homo sapiens actin binding LIM protein 1 (ABLIM1), transcript variant 4, mRNA.                            |
| 540747  | HS.276860 | -1,9 | 3,3E-06 | 601441142F1 NIH_MGC_72 Homo sapiens cDNA clone IMAGE:3915971 5, mRNA sequence                             |
| 4120437 | RRS1      | -1,9 | 2,2E-02 | Homo sapiens RRS1 ribosome biogenesis regulator homolog (S. cerevisiae) (RRS1), mRNA.                     |
| 6100414 | UPRT      | -2,0 | 1,0E-03 | Homo sapiens uracil phosphoribosyltransferase (FUR1) homolog (S. cerevisiae) (UPRT), mRNA.                |
| 4220504 | SERPINB6  | -2,0 | 1,5E-05 | Homo sapiens serpin peptidase inhibitor, clade B (ovalbumin), member 6 (SERPINB6), mRNA.                  |
| 6280184 | MAN1C1    | -2,0 | 1,7E-07 | Homo sapiens mannosidase, alpha, class 1C, member 1 (MAN1C1), mRNA.                                       |
| 4880537 | LIMA1     | -2,0 | 3,1E-05 | Homo sapiens LIM domain and actin binding 1 (LIMA1), mRNA.                                                |
| 2570291 | IFNGR2    | -2,0 | 1,0E-05 | Homo sapiens interferon gamma receptor 2 (interferon gamma transducer 1) (IFNGR2), mRNA.                  |
| 2000709 | HS.266775 | -2,1 | 9,5E-03 | RST23048 Athersys RAGE Library Homo sapiens cDNA, mRNA sequence                                           |
| 2750280 | CDK5R1    | -2,1 | 1,7E-06 | Homo sapiens cyclin-dependent kinase 5, regulatory subunit 1 (p35) (CDK5R1), mRNA.                        |
| 1240730 | SPINT2    | -2,1 | 5,4E-04 | Homo sapiens serine peptidase inhibitor, Kunitz type, 2 (SPINT2), mRNA.                                   |
| 6550528 | MAOA      | -2,2 | 1,7E-04 | Homo sapiens monoamine oxidase A (MAOA), nuclear gene encoding mitochondrial protein, mRNA.               |

|         |          |      |         |                                                                                                              |
|---------|----------|------|---------|--------------------------------------------------------------------------------------------------------------|
| 1070152 | IL17RB   | -2,2 | 1,4E-03 | Homo sapiens interleukin 17 receptor B (IL17RB), mRNA.                                                       |
| 830201  | TSKU     | -2,2 | 6,5E-05 | Homo sapiens tsukushin (TSKU), mRNA.                                                                         |
| 150072  | IRF8     | -2,5 | 3,3E-04 | Homo sapiens interferon regulatory factor 8 (IRF8), mRNA.                                                    |
| 4540398 | BEND5    | -2,6 | 2,2E-05 | Homo sapiens BEN domain containing 5 (BEND5), mRNA.                                                          |
| 4180600 | IL9      | -2,8 | 5,3E-03 | Homo sapiens interleukin 9 (IL9), mRNA.                                                                      |
| 1510008 | GALR2    | -2,8 | 1,2E-04 | Homo sapiens galanin receptor 2 (GALR2), mRNA.                                                               |
| 7040605 | IL5      | -2,9 | 5,6E-04 | Homo sapiens interleukin 5 (colony-stimulating factor, eosinophil) (IL5), mRNA.                              |
| 2120167 | IL9      | -2,9 | 4,5E-03 | Homo sapiens interleukin 9 (IL9), mRNA.                                                                      |
| 7610131 | EPAS1    | -3,0 | 5,4E-04 | Homo sapiens endothelial PAS domain protein 1 (EPAS1), mRNA.                                                 |
| 1430634 | MGC33556 | -3,0 | 1,7E-06 | Homo sapiens hypothetical LOC339541 (MGC33556), mRNA.                                                        |
| 3310445 | MRPS26   | -3,1 | 2,9E-07 | Homo sapiens mitochondrial ribosomal protein S26 (MRPS26), nuclear gene encoding mitochondrial protein, mRNA |
| 3310050 | GNRH2    | -3,3 | 1,4E-04 | Homo sapiens gonadotropin-releasing hormone 2 (GNRH2), transcript variant 1, mRNA.                           |
| 4880678 | GNRH2    | -5,0 | 2,8E-05 | Homo sapiens gonadotropin-releasing hormone 2 (GNRH2), transcript variant 2, mRNA.                           |

**Supplemental Table 5:** Clinical parameters of HIV-infected study participants receiving viral-suppressive antiretroviral therapy (ART).

| <b>Participant ID</b> | <b>CD4 counts<sup>#</sup></b> | <b>CD8 counts<sup>#</sup></b> | <b>Plasma viral load<sup>&amp;</sup></b> | <b>Time since infection<sup>*</sup></b> | <b>ART</b>                                     | <b>Time of aviremia<sup>\$</sup></b> |
|-----------------------|-------------------------------|-------------------------------|------------------------------------------|-----------------------------------------|------------------------------------------------|--------------------------------------|
| <b>ART #1</b>         | 391                           | 620                           | <40                                      | 165                                     | Kivexa                                         | 54                                   |
| <b>ART #2</b>         | 581                           | 1060                          | <40                                      | 96                                      | Sustiva, Truvada                               | 5                                    |
| <b>ART #3</b>         | 796                           | 399                           | <40                                      | 8                                       | Stribild                                       | 1                                    |
| <b>ART #4</b>         | 459                           | 545                           | <40                                      | 189                                     | Truvada, Raltegravir                           | >12                                  |
| <b>ART #5</b>         | 616                           | 330                           | <40                                      | 180                                     | Viracept, Truvada                              | 30                                   |
| <b>ART #6</b>         | 963                           | 644                           | <40                                      | 123                                     | Prevista, Kivexa, Norvir                       | 111                                  |
| <b>COL #1</b>         | 601                           | 819                           | <40                                      | 267                                     | Darunavir, Ritonavir,<br>Raltegravir           | 58                                   |
| <b>COL #2</b>         | 528                           | 501                           | <40                                      | 248                                     | Tivicay                                        | 84                                   |
| <b>COL #3</b>         | 428                           | 1035                          | <40                                      | 351                                     | Etravirine, Raltegravir,<br>Norvir, Darunavir  | 109                                  |
| <b>COL #4</b>         | 935                           | 581                           | <40                                      | 364                                     | Truvada, Darunavir, Norvir                     | 111                                  |
| <b>COL #5</b>         | 439                           | 685                           | <40                                      | 297                                     | Norvir, Raltegravir,<br>Darunavir, Maraviroc   | 100                                  |
| <b>COL #6</b>         | 628                           | 1063                          | <40                                      | 71                                      | Tivicay                                        | 51                                   |
| <b>COL #7</b>         | 254                           | 689                           | <40                                      | 287                                     | Dolutegravir, Etravirine,<br>Darunavir, Norvir | 86                                   |
| <b>COL #8</b>         | 137                           | 481                           | <40                                      | 321                                     | Tenofovir, Ritonavir                           | 103                                  |
| <b>COL #9</b>         | 512                           | 615                           | <40                                      | 194                                     | Raltegravir, Truvada                           | 103                                  |
| <b>COL #10</b>        | 612                           | 1104                          | <40                                      | 271                                     | Reyataz, Complera,<br>Raltegravir              | 121                                  |

#, cells/ $\mu$ l; &, HIV RNA copies per ml plasma; \*, months; ART, antiretroviral therapy; \$, months;  
 NA, information not available; COL, colonoscopy

**Supplemental Table 6: Antibodies used for flow cytometry analysis**

|                    | <b>Fluorochrome</b> | <b>Clone</b> | <b>Vendor</b>                          |
|--------------------|---------------------|--------------|----------------------------------------|
| CCR6               | PE                  | 11A9         | BD Pharmingen                          |
| CCR5               | FITC                | 2D7/CCR5     | (San Diego, CA, USA)                   |
| Ki67               | FITC                | B56          |                                        |
| CD25               | BV421               | M-A251       |                                        |
| Integrin $\beta$ 7 | FITC                | FIB504       | eBioscience                            |
| phospho-mTOR       | FITC                | MRRBY        | (San Diego, CA, USA)                   |
| CD56               | FITC                | MEM188       |                                        |
| CD8                | PerCP-Cy5.5         | RPA-T8       | BioLegend                              |
| CD19               | PerCP-Cy5.5         | HIB19        | (San Diego, CA, USA)                   |
| CD66b              | PerCP-Cy5.5         | CG10F5       |                                        |
| CD8                | FITC                | BW135/80     | Miltenyi Biotech                       |
| CD19               | FITC                | LT19         | (Auburn, CA, USA)                      |
| CXCR6              | PE                  | 56811        | R&D Systems,<br>(Minneapolis, MN, USA) |
| HIV-p24            | FITC                | KC57         | Beckman Coulter<br>(Brea, CA, USA)     |
